# Supplementary material for: The Karavansalija Mineralized Center at the Rogozna Mountains in SW Serbia: Magma Evolution and Time Relationship of Intrusive Events and Skarn Au ± Cu–Pb–Zn Mineralization
Source: Frontiers journal article supplement (doi:10.3389/feart.2021.798701), 2022-01-18
Supplement: Table_2.XLSX [file Table_2.XLSX]

## Sheet: Table 3_MajorTraceElements
Sample		17103	1680	1687	723	727	1361A	1677	831	1259	1681
major		wt.%	wt.%	wt.%	wt.%	wt.%	wt.%	wt.%	wt.%	wt.%	wt.%
SiO2		59.3999	62.8973	59.7849	60.1346	60.2229	56.6483	57.4857	58.1756	56.5387	54.3246
TiO2		0.5878	0.576328	0.604347	0.501869	0.593401	0.698173	0.503034	0.647257	0.558805	0.725034
Al2O3		15.1434	16.2157	16.5239	15.4673	15.0387	13.8201	14.7982	14.8007	14.6753	11.6238
Fe2O3		2.50757	3.67201	3.73691	4.51869	5.09799	5.4099	4.48976	5.78559	5.21889	5.43543
FeO		0	0	0	0	0	0	0	0	0	0
MnO		0.0828949	0.0441819	0.102303	0.180374	0.0974386	0.110387	0.14359	0.122087	0.281704	0.166173
MgO		1.73514	1.86546	1.7922	1.41869	2.28591	3.09461	2.20453	3.05703	2.17722	4.54887
CaO		5.11876	5.32343	4.20959	5.0243	5.30358	5.51651	5.70793	5.75071	5.65525	7.32739
Na2O		1.85477	3.00339	3.72175	0.96542	2.56264	1.88507	0.44954	2.2654	1.99862	0.245082
K2O		4.84747	3.60328	2.50359	3.86916	4.05247	5.66464	3.26784	4.76044	3.95951	6.73697
P2O5		0.234555	0.215019	0.215026	0.188785	0.381959	0.556652	0.170806	0.588151	0.207135	0.940409
Cr2O3		0.00312526	0.000186548	0.000443028	0	0.00549711	0.00712915	0.00294908	0.00638694	0	0.0273535
NiO		0.0010069	0.00103699	0.000988422	0.000511385	0.0015499	0.00290543	0.00128979	0.00194814	0.000808321	0.00485526
LOI		5.63603	1.80385	5.18965	6.45892	2.5142	5.59632	5.84735	3.07528	7.87191	7.10973
Total		97.1524	99.2212	98.3855	98.7285	98.1582	99.0106	95.0725	99.0366	99.1439	99.2157
in ppm
P		952.522	840.515	878.015	739.489	1498.1	1964.47	674.232	2074.37	818.887	3218.52
Sc		12.0211	11.1494	10.8312	6.79784	12.5277	15.357	11.012	15.9563	9.47105	18.0995
Ti		3226.63	3084.54	3347.87	2717.66	3407.34	3797.44	2700.64	3532.98	3180.66	3947.66
V		101.074	77.5304	75.119	60.4854	91.4334	94.914	84.5533	106.818	88.3664	106.007
Cr		37.7129	22.5765	18.6332	0	56.9118	60.9459	37.9448	64.9083	19.182	181.874
Mn		619.718	328.98	759.364	1266.4	719.463	780.224	1012.39	855.53	2046.43	1182.22
Co		9.96368	9.84163	14.215	7.89773	13.6708	16.8846	10.7481	16.7914	10.6693	19.7136
Ni		12.7138	12.0712	11.3126	10.6494	14.1233	21.0334	11.5162	17.1966	8.91819	31.1559
Cu		14.8005	9.84246	15.1171	6.92118	10.0752	16.2604	8.99124	17.2816	7.95564	43.5413
Zn		58.6907	47.1902	111.628	56.1425	59.1445	60.4352	33.238	143.023	254.178	149.063
Ga		17.0272	16.4681	17.2988	16.4119	17.4983	15.8052	14.9195	15.9451	16.7684	13.5438
Ge		4.23282	5.09053	0	0	3.10088	4.78	3.15922	5.96321	2.50889	4.09823
As		31.4563	3.72719	8.19692	3.746	17.7227	3.49465	14.247	12.6668	2.63303
Rb		220.083	102.142	116.666	161.295	178.851	216.913	122.491	223.001	210.29	308.298
Sr		435.423	934.103	572.168	534.825	1018.07	556.28	437.804	1048.34	370.331	775.738
Y		19.0934	19.9804	18.4205	18.7622	21.821	20.9009	17.5989	21.7235	22.8145	19.6807
Zr		187.792	142.407	158.285	159.631	180.037	223.789	173.595	185.463	166.618	258.812
Nb		10.1237	9.61968	8.85999	9.48871	10.876	14.7078	8.72448	10.6606	9.4047	16.0488
Mo		1.2633	2.27671	1.66432	1.88971	3.17342	2.31758	1.39657	1.93629	1.2558	2.5086
Sn		156.396	4.35075	161.166	3.90711	177.778	7.3256	169.315	3.84867	172.957	6.91467
Sb		0.881485	1.09619	0.685109	0.876353	0.152318	0.641463	1.70195	1.23842	1.60417	1.09807
Te		0.55667	0	0.502877	0	0	0	0	0	0.421108	0.615397
Cs		4.91923	3.35654	4.18512	11.4026	3.2154	2.62363	4.97435	2.75232	20.0132	4.54775
Ba		1361.18	964.216	477.419	1744.88	1365.32	1449.69	738.299	1738.39	1188.18	1876.24
La		40.8504	41.5816	36.009	45.4959	46.777	43.0687	32.9056	59.4977	39.1382	34.1851
Ce		78.1607	80.6649	68.9273	84.5945	89.052	83.9563	60.7821	107.468	71.4388	72.4021
Pr		8.80071	8.96216	7.97876	9.5164	10.155	9.77522	6.79945	11.5176	7.93761	8.90523
Nd		32.5687	32.8294	29.6582	34.1837	37.6962	36.3596	26.7422	42.1548	30.3032	37.2659
Sm		5.78992	6.3411	5.72935	5.94055	6.76534	6.76398	4.99212	7.64449	5.9727	6.79385
Eu		1.48185	1.61063	1.33916	1.35699	1.65843	1.58397	0.991784	1.71652	1.31154	1.6638
Gd		4.65588	4.69882	4.58459	4.7535	5.48365	5.20936	4.26795	5.77166	4.83481	5.89195
Tb		0.645008	0.619492	0.642555	0.594191	0.691722	0.712782	0.545969	0.775475	0.641122	0.688312
Dy		3.54852	3.90304	3.76547	3.56069	4.23951	3.90433	3.0444	4.23098	4.10108	4.09411
Ho		0.70054	0.779559	0.738768	0.672011	0.757206	0.708751	0.592048	0.779371	0.763883	0.707715
Er		2.0604	1.99909	2.08092	1.92424	2.28986	2.20282	1.7975	2.10234	2.44967	1.91126
Tm		0.291681	0.25886	0.279736	0.255259	0.303135	0.288357	0.259278	0.303798	0.345413	0.286232
Yb		1.93859	2.15436	1.88158	1.7984	2.00525	2.04172	1.55766	1.93075	2.2887	1.67193
Lu		0.321747	0.25487	0.262603	0.292931	0.321926	0.268534	0.270946	0.276263	0.366072	0.235805
Hf		5.22247	4.03616	4.43316	4.30947	4.97309	5.95256	4.72013	5.19089	4.71484	7.22389
Ta		0.873706	0.933447	0.67018	0.773849	0.881768	0.951869	0.639797	0.725125	0.718686	0.992153
W		61.0888	67.871	88.7554	64.8565	96.0504	79.3396	12.8723	63.6432	21.0385	67.8897
Tl		3.48231	0.378695	1.38197	1.55366	1.08369	1.03803	1.71278	1.06744	4.00977	2.34876
Pb		63.2485	33.5031	102.459	21.7596	50.1984	27.7284	23.254	17.5543	207.572	81.7156
Bi		2.69203	0.212261	1.02712	0	0.636619	0.302921	6.78118	0.0853928	4.95529	0.153582
Th		18.5919	19.4303	14.8596	20.67	19.2667	26.8343	18.3441	24.1225	18.3627	24.4035
U		5.86947	7.26064	4.75834	6.78379	7.18675	10.9012	6.75812	6.61976	10.5409	10.9662

## Sheet: Table 4_LA-ICP-MS_Dating
LA_ICP_MS session 30.03.2017
sample	207Pb/235U	error (2σ)	206Pb/238U	error (2σ)	rho = 206Pb/238U vs 207Pb/235U	207Pb/206Pb	error (2σ)	Final age 207Pb/235U	error (2σ)	Final age 206Pb/238U	error (2σ)	Final age 207Pb/206Pb	error (2σ)
723
0723-1	0.0257	0.0017	0.00419	0.0002	0.44568	0.0446	0.0023	25.8	1.7	26.93	1.3	-60	100
0723-2	0.026	0.0014	0.00412	0.0002	0.34073	0.0459	0.0018	26.1	1.4	26.51	1.3	-5	84
0723-3	0.0284	0.0016	0.00435	0.00024	0.35378	0.0476	0.0021	28.4	1.6	28	1.5	75	95
0723-4	0.0279	0.0018	0.00423	0.00021	0.47333	0.0479	0.0022	27.9	1.7	27.19	1.4	91	97
0723-5	0.0282	0.0031	0.00426	0.00029	0.48984	0.0481	0.0044	28.2	3.1	27.4	1.9	100	200
0723-6	0.026	0.0019	0.00417	0.00024	0.73586	0.0452	0.0019	26.1	1.8	26.8	1.5	-33	86
0723-7	0.0285	0.0024	0.00432	0.00028	0.51644	0.048	0.0029	28.6	2.3	27.8	1.8	90	130
0723-8	0.028	0.0017	0.00426	0.00022	0.3384	0.0478	0.002	28.1	1.7	27.41	1.4	83	91
0723-9	0.0286	0.0017	0.00432	0.00022	0.47885	0.0481	0.0021	28.6	1.7	27.82	1.4	96	94
0723-10	0.0359	0.0026	0.00421	0.00021	0.64835	0.0617	0.0033	35.8	2.6	27.07	1.4	630	120
0723-11	0.0281	0.002	0.00421	0.00024	0.64859	0.0484	0.0022	28.1	2	27.1	1.5	113	98
0723-12	0.0297	0.0033	0.00418	0.00028	0.45623	0.0516	0.0046	29.7	3.2	26.9	1.8	250	200
0723-13	0.0276	0.0019	0.00435	0.00024	0.44289	0.046	0.0022	27.6	1.9	27.99	1.5	0	100
0723-14	0.02687	0.0013	0.00423	0.00023	0.56936	0.047	0.0016	26.92	1.3	27.19	1.5	49	76
0723-15	0.0279	0.003	0.00419	0.00028	0.43506	0.0484	0.0042	27.9	2.9	27	1.8	100	180
0723-16	0.0294	0.0014	0.0045	0.00022	0.2896	0.0475	0.0017	29.42	1.3	28.97	1.4	72	78
0723-17	0.0279	0.0018	0.004119	0.0002	0.41272	0.0492	0.0023	28	1.8	26.5	1.3	150	100
0723-18	0.0271	0.0015	0.00419	0.00021	0.13452	0.0471	0.0022	27.2	1.5	26.97	1.3	60	100
0723-19	0.0261	0.0022	0.00422	0.00022	0.70398	0.0448	0.0027	26.2	2.2	27.14	1.4	-50	120
0723-20	0.0261	0.0021	0.0041	0.00022	0.60073	0.046	0.0027	26.1	2.1	26.37	1.4	0	120
0723-21	0.0287	0.0023	0.00448	0.00029	0.63926	0.0466	0.0025	28.8	2.2	28.8	1.9	30	120
0723-22	0.0271	0.0017	0.00418	0.00021	0.21315	0.0471	0.0026	27.1	1.7	26.92	1.3	50	120
0723-23	0.0281	0.0019	0.00426	0.00021	0.64195	0.0477	0.002	28.1	1.8	27.4	1.3	83	93
0723-24	0.035	0.005	0.00434	0.00024	0.47137	0.0581	0.0073	34.9	4.9	27.9	1.6	410	260
0723-25	0.0278	0.0024	0.00445	0.00026	0.33016	0.0456	0.0033	27.9	2.3	28.6	1.7	-20	150
0723-26	0.0273	0.0018	0.00433	0.00022	0.49866	0.0458	0.0022	27.3	1.8	27.82	1.4	-9	98
0723-27	0.0287	0.002	0.00439	0.00024	0.72798	0.0474	0.002	28.8	2	28.2	1.5	69	90
0723-28	0.0265	0.0021	0.00416	0.0002	0.51378	0.0463	0.0028	26.6	2	26.74	1.3	20	130
0723-29	0.028	0.002	0.00428	0.00028	0.54169	0.0475	0.0025	28	2	27.6	1.8	70	110
0723-30	0.0285	0.0022	0.00426	0.00022	0.34925	0.0485	0.0031	28.5	2.1	27.41	1.4	110	130
0723-31	0.028	0.0017	0.0043	0.00022	0.54683	0.0472	0.002	28	1.7	27.66	1.4	59	89
0723-32	0.053	0.012	0.00458	0.00031	0.71647	0.083	0.016	53	12	29.4	2	1090	440
0723-33	0.0273	0.0018	0.00415	0.00021	0.66424	0.0476	0.0019	27.3	1.7	26.67	1.3	79	87
0723-34	0.0263	0.0023	0.0042	0.00021	0.48004	0.0453	0.0031	26.4	2.3	27.04	1.4	-30	140
0723-35	0.0262	0.0018	0.00413	0.00022	0.65191	0.0459	0.002	26.2	1.8	26.58	1.4	-4	90
0723-36	0.0283	0.0024	0.00422	0.00022	0.64506	0.0484	0.0029	28.3	2.4	27.13	1.4	110	130
0723-37	0.0285	0.0022	0.00435	0.00022	0.44021	0.0475	0.0028	28.6	2.1	28	1.4	70	130
0723-38	0.0288	0.0027	0.00426	0.00025	0.47325	0.049	0.0037	28.8	2.7	27.4	1.6	140	170
0723-39	0.0289	0.0018	0.00436	0.00024	0.56337	0.0481	0.002	28.9	1.8	28	1.6	98	91
0723-40	0.0279	0.002	0.00436	0.00023	0.39253	0.0464	0.0025	27.9	1.9	28.04	1.5	20	110
0723-41	0.0291	0.002	0.00441	0.00025	0.55489	0.0478	0.0023	29.1	2	28.3	1.6	80	100
0723-42	0.0304	0.0038	0.00441	0.00025	0.61485	0.0498	0.0049	30.4	3.7	28.4	1.6	150	200
0723-43	0.0269	0.0015	0.00429	0.00024	0.48576	0.0462	0.0019	27	1.5	27.62	1.5	9	85
0723-44	0.0282	0.0027	0.00446	0.00024	0.36018	0.0458	0.0036	28.2	2.7	28.7	1.6	-10	160
0723-45	0.226	0.055	0.0061	0.0006	0.96363	0.258	0.045	200	44	39.2	3.8	3080	310
0723-46	0.026	0.0016	0.004094	0.0002	0.28277	0.0461	0.0024	26	1.6	26.34	1.3	0	110
0723-47	0.0271	0.0017	0.00419	0.00022	0.31922	0.047	0.0024	27.2	1.7	26.97	1.4	50	110
0723-48	0.027	0.002	0.004199	0.0002	0.19528	0.0466	0.0029	27	2	27.01	1.3	30	130
0723-49	0.0287	0.0022	0.00431	0.00021	0.28898	0.0482	0.003	28.7	2.2	27.74	1.4	100	130
0723-50	0.0276	0.0022	0.00422	0.00026	0.66042	0.0473	0.0025	27.6	2.1	27.1	1.7	60	110
0723-51	0.028	0.0018	0.00424	0.00022	0.38083	0.048	0.0023	28.1	1.8	27.28	1.4	90	100
0723-52	0.0267	0.002	0.00404	0.00021	0.38109	0.0479	0.0028	26.8	2	25.98	1.3	90	130
0723-53	0.0271	0.0016	0.00428	0.00021	0.33844	0.046	0.0018	27.2	1.5	27.51	1.3	6	84
0723-54	0.0284	0.002	0.00424	0.00021	0.37775	0.0484	0.0026	28.4	2	27.29	1.4	110	120
0723-55	0.0426	0.0038	0.00563	0.00039	0.8253	0.0544	0.0027	42.3	3.7	36.2	2.5	360	110
0723-56	0.0272	0.0018	0.00417	0.00022	0.52754	0.0474	0.0023	27.3	1.8	26.83	1.4	60	100
0723-57	0.0281	0.0018	0.00426	0.00024	0.60339	0.0471	0.0019	28.1	1.7	27.43	1.5	56	86
0723-58	0.0288	0.0032	0.00415	0.00034	0.64147	0.0503	0.0041	28.8	3.2	26.7	2.2	190	180
0723-59	0.031	0.0035	0.00467	0.00026	0.58934	0.0472	0.0039	31	3.4	30	1.7	50	160
0723-60	0.0282	0.002	0.00428	0.00022	0.37868	0.0477	0.0027	28.2	2	27.5	1.4	80	120
0723-61	0.0266	0.0019	0.00426	0.00025	0.41117	0.0454	0.0025	26.6	1.9	27.4	1.6	-20	110
0723-62	0.0292	0.0023	0.00437	0.00025	0.60448	0.0484	0.0027	29.2	2.3	28.1	1.6	110	120
0723-63	0.0281	0.0021	0.00422	0.00023	0.68653	0.0482	0.0022	28.1	2.1	27.13	1.5	103	99
0723-64	0.0275	0.0018	0.00427	0.00022	0.70393	0.0466	0.0019	27.5	1.8	27.47	1.4	33	88
0723-65	0.0288	0.0027	0.00432	0.00032	0.63882	0.0483	0.0032	28.8	2.7	27.8	2	110	140
0723-66	0.0299	0.003	0.00442	0.00025	0.11402	0.0493	0.005	29.9	2.9	28.5	1.6	130	200
0723-67	0.0402	0.0036	0.00417	0.00021	0.29724	0.0698	0.0053	40	3.5	26.84	1.3	870	160
0723-68	0.0286	0.0019	0.00432	0.00024	0.70751	0.0478	0.0018	28.6	1.9	27.8	1.6	88	82
0723-69	0.0275	0.0018	0.00424	0.00024	0.5844	0.0469	0.0019	27.5	1.8	27.3	1.5	45	87
831
0831-1	0.0276	0.0021	0.00415	0.00023	0.3509	0.0484	0.003	27.6	2	26.72	1.5	110	130
0831-2	0.027	0.002	0.00424	0.00021	0.40965	0.0465	0.0027	27.1	2	27.27	1.3	20	120
0831-3	0.0272	0.0019	0.00428	0.00021	0.43347	0.0463	0.0024	27.2	1.9	27.51	1.3	10	110
0831-4	0.0281	0.0019	0.004184	0.0002	0.47069	0.049	0.0023	28.2	1.8	26.92	1.3	140	110
0831-5	0.0278	0.0017	0.0042	0.00021	0.75913	0.0482	0.0015	27.9	1.7	27.02	1.3	106	69
0831-6	0.0267	0.0018	0.00424	0.00023	0.48555	0.0459	0.0023	26.8	1.8	27.31	1.5	0	100
0831-7	0.0294	0.002	0.00429	0.00025	0.56052	0.05	0.0022	29.4	2	27.6	1.6	180	100
0831-8	0.028	0.0019	0.00428	0.00024	0.59293	0.0476	0.0021	28	1.9	27.56	1.5	75	96
0831-9	0.0558	0.0045	0.00465	0.00024	0.6458	0.0871	0.0051	55.1	4.3	29.92	1.5	1330	110
0831-10	0.029	0.0019	0.00433	0.00024	0.58248	0.0487	0.0022	29	1.9	27.84	1.5	130	100
0831-11	0.0276	0.0017	0.0043	0.00021	0.30006	0.0469	0.0024	27.6	1.7	27.66	1.4	40	110
0831-12	0.032	0.0023	0.00429	0.00023	0.65436	0.0542	0.0024	32	2.2	27.63	1.4	365	97
0831-13	0.0277	0.0015	0.004259	0.0002	0.4129	0.0474	0.0016	27.7	1.5	27.4	1.3	67	75
0831-14	0.0296	0.0022	0.00443	0.00022	0.29098	0.0488	0.003	29.6	2.1	28.5	1.4	120	130
0831-15	0.0274	0.0016	0.00422	0.00022	0.36512	0.0475	0.002	27.5	1.6	27.15	1.4	69	91
0831-16	0.0276	0.002	0.00424	0.00022	0.58405	0.0473	0.0024	27.6	2	27.28	1.4	60	110
0831-17	0.0283	0.0018	0.00421	0.00021	0.51367	0.049	0.0021	28.4	1.8	27.09	1.3	138	94
0831-18	0.0279	0.0022	0.0042	0.00024	0.66973	0.0484	0.0025	27.9	2.1	27	1.6	110	110
0831-19	0.0279	0.0015	0.00435	0.00023	0.46895	0.0468	0.0018	28	1.5	28.01	1.5	43	82
0831-20	0.0289	0.0016	0.00409	0.00022	0.51313	0.0515	0.0019	28.9	1.6	26.34	1.4	254	83
0831-21	0.076	0.016	0.00474	0.00029	0.78865	0.109	0.019	73	15	30.5	1.9	1400	360
0831-22	0.028	0.0018	0.00425	0.00022	0.50235	0.048	0.0021	28	1.8	27.31	1.4	92	95
0831-23	0.0278	0.0016	0.00436	0.00022	0.6131	0.0464	0.0016	27.8	1.5	28.06	1.4	20	73
0831-24	0.0317	0.0026	0.00445	0.0003	0.48132	0.0522	0.0035	31.7	2.6	28.6	1.9	260	140
0831-25	0.0289	0.0026	0.00423	0.00029	0.34793	0.05	0.0035	28.9	2.5	27.2	1.9	190	160
0831-26	0.0443	0.0037	0.0043	0.00023	0.659	0.0747	0.0045	44	3.6	27.68	1.5	1050	120
0831-27	0.033	0.0051	0.00444	0.00024	0.70593	0.0536	0.0067	32.9	5	28.6	1.6	280	260
0831-28	0.0268	0.0017	0.004292	0.0002	0.41094	0.0455	0.002	26.9	1.6	27.61	1.3	-19	92
0831-29	0.0275	0.0017	0.00417	0.00024	0.56943	0.048	0.0021	27.5	1.7	26.8	1.6	96	95
0831-30	0.0269	0.0023	0.00416	0.00028	0.67462	0.0469	0.0027	26.9	2.3	26.8	1.8	40	120
0831-31	0.0266	0.0016	0.00419	0.00021	0.4719	0.0463	0.0018	26.7	1.5	26.94	1.3	17	82
0831-32	0.0297	0.0026	0.00425	0.00021	0.49226	0.0507	0.0035	29.7	2.6	27.36	1.4	200	150
0831-33	0.026	0.0017	0.00432	0.00021	0.38705	0.0438	0.0021	26	1.6	27.81	1.3	-96	96
0831-34	0.0295	0.0016	0.00415	0.0002	0.60007	0.0517	0.0016	29.5	1.6	26.72	1.3	263	71
0831-35	0.027	0.0018	0.00425	0.00021	0.58562	0.0461	0.0021	27	1.8	27.33	1.3	9	97
0831-36	0.0652	0.0096	0.00465	0.00026	0.72997	0.1	0.012	63.9	9.2	29.9	1.7	1480	270
0831-37	0.0269	0.0016	0.004144	0.0002	0.48638	0.0472	0.0018	26.9	1.6	26.66	1.3	60	82
0831-38	0.0273	0.0016	0.00431	0.00022	0.49697	0.0462	0.0018	27.4	1.6	27.75	1.4	13	83
0831-39	0.029	0.0021	0.00429	0.00023	0.65672	0.0491	0.0022	29	2	27.62	1.5	143	97
0831-40	0.0319	0.0024	0.00429	0.00023	0.83671	0.0539	0.0023	31.9	2.4	27.57	1.5	347	97
0831-41	0.03	0.0023	0.00429	0.00024	0.41459	0.0511	0.0029	30	2.2	27.57	1.5	220	120
0831-42	0.0288	0.0022	0.00424	0.00025	0.5673	0.0494	0.0026	28.8	2.1	27.3	1.6	160	120
0831-43	0.0276	0.002	0.00422	0.00023	0.14458	0.0479	0.0032	27.7	2	27.12	1.4	80	140
0831-44	0.0267	0.0016	0.00431	0.00021	0.32891	0.0458	0.0024	26.7	1.6	27.73	1.4	-10	110
0831-45	0.0273	0.0035	0.00402	0.00025	0.49227	0.0493	0.0053	27.3	3.5	25.9	1.6	140	230
0831-46	0.055	0.0088	0.00454	0.00023	0.60966	0.086	0.012	54.1	8.5	29.21	1.5	1150	290
0831-47	0.02783	0.0014	0.00423	0.00021	0.4673	0.0489	0.0022	27.87	1.4	27.22	1.4	133	99
0831-48	0.0284	0.0018	0.00437	0.00024	0.43697	0.0474	0.0024	28.4	1.8	28.14	1.5	60	110
0831-49	0.0274	0.0015	0.00421	0.0002	0.5513	0.0473	0.0016	27.4	1.5	27.09	1.3	62	76
0831-50	0.0295	0.0032	0.00424	0.00022	0.5001	0.0504	0.0046	29.5	3.1	27.25	1.4	180	190
0831-51	0.029	0.0019	0.00436	0.00022	0.40809	0.0485	0.0024	29	1.9	28.05	1.4	110	110
0831-52	0.0285	0.002	0.00433	0.00022	0.42129	0.0478	0.0026	28.5	2	27.87	1.4	80	120
0831-53	0.0268	0.002	0.00415	0.00022	0.61414	0.0469	0.0025	26.8	2	26.68	1.4	50	120
0831-54	0.028	0.0021	0.004098	0.00019	0.029405	0.0497	0.0034	28	2.1	26.36	1.2	170	150
0831-55	0.0281	0.0031	0.00421	0.00025	0.5058	0.0486	0.0043	28.2	3	27.1	1.6	120	190
0831-56	0.0289	0.0023	0.00441	0.00023	0.65226	0.0475	0.0025	29	2.2	28.4	1.5	70	110
0831-57	0.0273	0.0028	0.00427	0.00028	0.5016	0.0464	0.0036	27.3	2.8	27.5	1.8	20	160
0831-58	0.0276	0.0018	0.00416	0.0002	0.64733	0.0482	0.0021	27.6	1.8	26.78	1.3	106	96
0831-59	0.0276	0.002	0.00423	0.00023	0.82615	0.0471	0.0023	27.6	2	27.24	1.5	50	100
0831-60	0.027	0.0015	0.00418	0.00021	0.15686	0.0473	0.0021	27.1	1.5	26.86	1.3	61	95
0831-61	0.0262	0.0017	0.00413	0.00022	0.41104	0.0462	0.0022	26.2	1.7	26.58	1.4	10	100
0831-62	0.027	0.0017	0.00428	0.00021	0.16014	0.046	0.0025	27	1.7	27.5	1.4	0	110
0831-63	0.0287	0.0018	0.00435	0.00022	0.48632	0.048	0.002	28.8	1.8	28	1.4	94	92
0831-64	0.0273	0.0019	0.00424	0.00021	0.65549	0.0466	0.0021	27.3	1.8	27.3	1.4	32	97
0831-65	0.029	0.0022	0.00433	0.00026	0.51541	0.0488	0.003	29	2.2	27.8	1.6	130	130
0831-66	0.0296	0.0022	0.00442	0.00025	0.41248	0.0487	0.003	29.6	2.2	28.5	1.6	130	140
0831-67	0.0288	0.002	0.00433	0.00025	0.67157	0.0483	0.0021	28.8	2	27.9	1.6	106	93
0831-68	0.0264	0.002	0.00409	0.00024	0.78727	0.0467	0.0019	26.4	1.9	26.3	1.5	36	88
1361A
1361A-1	0.0318	0.0024	0.00419	0.00021	0.29105	0.055	0.0034	31.8	2.3	26.95	1.4	380	140
1361A-2	0.0284	0.0021	0.00433	0.00023	0.4114	0.0472	0.0027	28.5	2.1	27.86	1.5	60	120
1361A-3	0.0337	0.0033	0.00432	0.00025	0.47702	0.0566	0.0047	33.6	3.3	27.8	1.6	430	180
1361A-4	0.0273	0.0015	0.00419	0.00021	0.60735	0.0472	0.0015	27.3	1.5	26.92	1.3	57	70
1361A-5	0.0278	0.002	0.0042	0.00025	0.36108	0.0482	0.0031	27.8	2	27	1.6	100	140
1361A-6	0.0288	0.0019	0.00446	0.00022	0.30383	0.0468	0.0025	28.8	1.9	28.67	1.4	40	110
1361A-7	0.0299	0.0025	0.00447	0.00027	0.59464	0.0482	0.0028	29.9	2.5	28.8	1.7	100	130
1361A-8	0.0301	0.0025	0.00417	0.00022	0.62678	0.0522	0.0028	30.1	2.4	26.81	1.4	280	120
1361A-9	0.0315	0.0033	0.0042	0.00024	0.3918	0.0543	0.0048	31.5	3.2	27	1.6	340	190
1361A-10	0.0284	0.0017	0.004298	0.00021	0.49958	0.0477	0.002	28.4	1.7	27.65	1.3	86	94
1361A-11	0.034	0.0036	0.00434	0.00027	0.66467	0.0565	0.0043	33.9	3.5	27.9	1.7	440	160
1361A-12	0.0311	0.0018	0.00437	0.00025	0.16841	0.0518	0.0029	31.1	1.7	28.1	1.6	260	130
1361A-13	0.0276	0.0017	0.00433	0.00024	0.2577	0.0463	0.0022	27.6	1.7	27.83	1.5	20	100
1361A-14	0.549	0.034	0.0702	0.0043	0.9277	0.0566	0.001	444	22	437	26	472	40
1361A-15	0.0272	0.002	0.00437	0.00022	0.49767	0.0451	0.0024	27.3	2	28.1	1.4	-40	110
1361A-16	0.0268	0.0014	0.0042	0.00022	0.078264	0.0464	0.002	26.9	1.4	27.03	1.4	22	89
1361A-17	0.0255	0.0021	0.00433	0.00023	0.3562	0.0427	0.0029	25.5	2	27.84	1.5	-150	130
1361A-18	0.0277	0.0017	0.00428	0.00022	0.67316	0.0468	0.0017	27.7	1.7	27.55	1.4	38	79
1361A-19	0.0274	0.0018	0.00435	0.00025	0.57009	0.0469	0.0029	27.5	1.8	28	1.6	30	120
1361A-20	0.0277	0.0023	0.00424	0.00027	0.55471	0.0473	0.0029	27.7	2.3	27.3	1.7	60	130
1361A-21	0.026	0.0018	0.00406	0.00021	0.53482	0.0463	0.0025	26.1	1.8	26.11	1.4	20	110
1361A-22	0.0297	0.0019	0.00456	0.00026	0.23224	0.0475	0.0027	29.7	1.9	29.3	1.7	70	120
1361A-23	0.0259	0.0014	0.00407	0.0002	0.60815	0.0461	0.0014	25.96	1.4	26.15	1.3	10	66
1361A-24	0.0272	0.0019	0.00425	0.00021	0.39241	0.0463	0.0026	27.2	1.9	27.32	1.4	10	110
1361A-25	0.0281	0.0023	0.00432	0.00025	0.54338	0.0469	0.0028	28.1	2.2	27.8	1.6	40	120
1361A-26	0.028	0.0017	0.00433	0.00022	0.48877	0.0468	0.002	28	1.7	27.86	1.4	43	91
1361A-27	0.027	0.0016	0.0042	0.0002	0.39205	0.0459	0.0017	27	1.6	27.02	1.3	25	90
1361A-28	0.0273	0.0018	0.00416	0.00021	0.67894	0.0474	0.002	27.3	1.8	26.74	1.4	68	91
1361A-29	0.0273	0.0019	0.00434	0.00021	0.27184	0.0455	0.0026	27.3	1.9	27.95	1.4	-20	120
1361A-30	0.0266	0.0015	0.004188	0.0002	0.60256	0.0463	0.0019	26.7	1.5	26.94	1.3	15	86
1361A-31	0.0277	0.0025	0.00432	0.00024	0.50674	0.0463	0.0033	27.7	2.5	27.8	1.6	10	150
1361A-32	0.0279	0.0017	0.00423	0.00021	0.39766	0.0477	0.0021	27.9	1.7	27.23	1.4	79	97
1361A-33	0.0278	0.0018	0.00432	0.00022	0.39232	0.0467	0.0022	27.8	1.7	27.77	1.4	30	97
1361A-34	0.0282	0.0019	0.00426	0.00022	0.43589	0.048	0.0024	28.2	1.8	27.38	1.4	90	110
1361A-35	0.0286	0.0016	0.00434	0.00021	0.50145	0.0477	0.0017	28.6	1.6	27.89	1.3	82	79
1361A-36	0.0275	0.0018	0.00426	0.00021	0.49255	0.0466	0.0021	27.5	1.8	27.43	1.4	31	98
1361A-37	0.0279	0.0017	0.00421	0.00021	0.47691	0.048	0.002	28	1.7	27.09	1.4	95	91
1361A-38	0.0263	0.002	0.00418	0.00021	0.46407	0.0455	0.0026	26.3	2	26.86	1.4	-20	120
1361A-39	0.0276	0.0021	0.00416	0.00021	0.53981	0.0479	0.0027	27.7	2.1	26.79	1.3	90	120
1361A-40	0.0274	0.0017	0.00421	0.00023	0.65894	0.0471	0.0018	27.5	1.7	27.1	1.5	55	83
1361A-41	0.0276	0.0018	0.00416	0.0002	0.51617	0.0475	0.0022	27.6	1.8	26.76	1.3	67	98
1361A-42	0.246	0.017	0.032	0.0022	0.69776	0.0559	0.0024	223	14	203	14	427	96
1361A-43	0.0285	0.0019	0.0043	0.00024	0.3342	0.0481	0.0026	28.5	1.9	27.6	1.5	90	110
1361A-44	0.028	0.0024	0.00434	0.00029	0.40468	0.047	0.0036	28	2.3	27.9	1.9	40	160
1361A-45	0.0289	0.0029	0.00423	0.00023	0.38163	0.0493	0.004	28.9	2.8	27.19	1.5	150	170
1361A-46	0.0337	0.0022	0.00452	0.00026	0.74367	0.0539	0.0019	33.7	2.2	29.1	1.6	356	79
1361A-47	0.02678	0.0014	0.00415	0.00019	0.36271	0.0467	0.0016	26.83	1.4	26.69	1.2	38	72
1361A-48	0.0278	0.0017	0.00413	0.00021	0.058397	0.0488	0.0028	27.9	1.7	26.6	1.4	130	120
1361A-49	0.0264	0.002	0.00423	0.00023	0.42288	0.0451	0.0028	26.4	2	27.21	1.5	-40	130
1361A-50	0.0298	0.0016	0.00431	0.00021	0.58716	0.0501	0.0016	29.9	1.6	27.73	1.4	191	71
1361A-51	0.0274	0.0016	0.00418	0.00021	0.39816	0.0474	0.0019	27.4	1.5	26.9	1.3	68	88
1361A-52	0.0337	0.0029	0.00433	0.00025	0.59502	0.055	0.0028	33.7	2.9	27.9	1.6	430	130
1361A-53	0.0279	0.0018	0.00421	0.00021	0.39829	0.048	0.0022	27.9	1.7	27.06	1.3	93	98
1361A-54	0.027	0.0015	0.004181	0.0002	0.53005	0.0467	0.0017	27.1	1.5	26.9	1.3	36	77
1361A-55	0.0285	0.0025	0.00426	0.00023	0.14477	0.0486	0.0038	28.6	2.5	27.41	1.5	110	160
1361A-56	0.0295	0.0029	0.00436	0.00025	0.52765	0.0489	0.0039	29.5	2.9	28.1	1.6	130	170
1361A-57	0.0268	0.0018	0.00423	0.00022	0.22793	0.046	0.0026	26.8	1.8	27.2	1.4	0	120
1361A-58	0.0299	0.0035	0.00438	0.00031	0.55198	0.0494	0.0047	29.9	3.4	28.2	2	140	190
1361A-59	0.0269	0.0017	0.00427	0.00022	0.052229	0.0466	0.0028	26.9	1.6	27.44	1.4	20	120
1361A-60	0.0283	0.0016	0.00436	0.00023	0.38083	0.0471	0.0021	28.4	1.6	28.04	1.5	52	91
1361A-61	0.0275	0.0016	0.00429	0.00023	0.40642	0.0473	0.0023	27.6	1.6	27.59	1.5	60	100
1361A-62	0.02743	0.0014	0.00434	0.00022	0.39333	0.0453	0.0014	27.47	1.4	27.92	1.4	-28	65
1361B
1361B-1	0.0258	0.0017	0.00416	0.00022	0.47502	0.0448	0.0021	25.9	1.7	26.76	1.4	-52	97
1361B-2	0.0289	0.0029	0.00444	0.00026	0.64373	0.0468	0.0035	28.9	2.9	28.6	1.7	30	150
1361B-3	0.028	0.0017	0.00436	0.00023	0.35681	0.0466	0.0021	28	1.7	28.02	1.4	30	97
1361B-4	0.0293	0.0031	0.0045	0.00025	0.45065	0.047	0.004	29.3	3.1	28.9	1.6	40	180
1361B-5	0.0276	0.0019	0.00414	0.0002	0.57341	0.0481	0.0023	27.6	1.8	26.63	1.3	100	100
1361B-6	0.171	0.038	0.00573	0.0005	0.94483	0.199	0.035	157	34	36.8	3.2	2490	420
1361B-7	0.0282	0.002	0.0044	0.00023	0.5076	0.0462	0.0024	28.2	2	28.33	1.5	10	110
1361B-8	0.0274	0.0019	0.00432	0.00022	0.54875	0.0458	0.0022	27.5	1.9	27.78	1.4	-6	98
1361B-9	0.0268	0.0017	0.00417	0.00022	0.18321	0.0466	0.0026	26.8	1.7	26.81	1.4	30	120
1361B-10	0.0283	0.0017	0.00409	0.00021	0.55149	0.0496	0.0019	28.3	1.7	26.3	1.3	168	87
1361B-11	0.0266	0.0017	0.00414	0.00022	0.47247	0.0465	0.0022	26.7	1.7	26.61	1.4	28	99
1361B-12	0.0286	0.0021	0.00443	0.00024	0.52801	0.0466	0.0026	28.6	2.1	28.51	1.5	30	120
1361B-13	0.0271	0.0017	0.00422	0.00021	0.1796	0.0465	0.0024	27.1	1.7	27.18	1.3	20	110
1361B-14	0.0273	0.0021	0.00421	0.00024	0.43492	0.0469	0.0027	27.3	2	27.1	1.5	40	120
1361B-15	0.0261	0.0016	0.004091	0.0002	0.55978	0.046	0.002	26.1	1.6	26.32	1.3	1	90
1361B-16	0.0266	0.0019	0.00417	0.00023	0.34212	0.0463	0.0027	26.6	1.9	26.8	1.5	10	120
1361B-17	0.0381	0.0041	0.00446	0.00025	0.68221	0.0613	0.005	38	4	28.7	1.6	600	180
1361B-18	0.0269	0.0023	0.00424	0.00023	0.70852	0.0455	0.0028	26.9	2.3	27.27	1.5	-20	130
1361B-19	0.0262	0.0016	0.00407	0.00022	0.018308	0.0467	0.0027	26.2	1.5	26.19	1.4	30	120
1361B-20	0.0269	0.0016	0.00423	0.00021	0.46658	0.046	0.0018	26.9	1.5	27.22	1.4	2	84
1361B-21	0.03	0.0027	0.00446	0.00032	0.28612	0.0488	0.0039	30	2.7	28.7	2.1	130	180
1361B-22	0.0287	0.0019	0.00425	0.00029	0.53326	0.049	0.0026	28.7	1.9	27.3	1.9	140	120
1361B-23	0.0292	0.0021	0.004298	0.00021	0.23138	0.0491	0.003	29.2	2.1	27.65	1.3	140	130
1361B-24	0.0291	0.0029	0.00449	0.00031	0.34711	0.0471	0.0041	29.1	2.8	28.9	2	50	190
1361B-25	0.0266	0.0017	0.00413	0.00021	0.50239	0.0464	0.002	26.6	1.6	26.59	1.4	21	89
1361B-26	0.059	0.014	0.00455	0.00038	0.42122	0.093	0.018	58	13	29.3	2.4	1300	380
1361B-27	0.0263	0.0023	0.00421	0.00024	0.47469	0.045	0.0031	26.3	2.3	27.1	1.5	-40	140
1361B-28	0.0273	0.0016	0.00435	0.00022	0.43402	0.0454	0.0019	27.4	1.5	27.99	1.4	-22	86
1361B-29	0.0274	0.0022	0.00451	0.00028	0.30446	0.0441	0.0033	27.4	2.1	29	1.8	-90	150
1361B-30	0.0278	0.0019	0.00425	0.00021	0.47743	0.0468	0.0023	27.9	1.9	27.36	1.4	40	110
1361B-31	0.0272	0.0018	0.00425	0.00021	0.48929	0.0462	0.0022	27.2	1.8	27.36	1.3	10	100
1361B-32	0.0289	0.0024	0.00421	0.0002	0.42236	0.0495	0.0033	28.9	2.3	27.07	1.3	150	140
1361B-33	0.0279	0.0018	0.00418	0.00019	0.46716	0.0481	0.0022	27.9	1.8	26.89	1.3	97	98
1361B-34	0.062	0.013	0.00448	0.00024	0.30852	0.1	0.02	61	12	28.84	1.5	1250	400
1361B-35	0.0298	0.0027	0.00449	0.00022	0.71141	0.047	0.0027	29.9	2.6	28.86	1.4	50	120
1361B-36	0.0265	0.0018	0.00412	0.0002	0.38558	0.046	0.0024	26.5	1.7	26.48	1.3	0	110
1361B-37	0.0276	0.0022	0.00433	0.00023	0.51473	0.045	0.0022	27.6	2.1	27.88	1.4	-10	120
1361B-38	0.027	0.0018	0.00423	0.00021	0.67931	0.0459	0.0019	27	1.8	27.21	1.4	0	87
1361B-39	0.0283	0.0025	0.00426	0.00025	0.50928	0.0479	0.0032	28.3	2.5	27.4	1.6	80	140
1361B-40	0.0279	0.0019	0.00417	0.00021	0.26321	0.0478	0.0028	28	1.9	26.84	1.3	80	120
1361B-41	0.0268	0.0019	0.00419	0.00023	0.61363	0.0463	0.0022	26.9	1.9	26.93	1.5	20	100
1361B-42	0.0281	0.0022	0.00429	0.00025	0.53991	0.0473	0.0026	28.1	2.1	27.6	1.6	60	120
1361B-43	0.0274	0.0015	0.004164	0.00019	0.56839	0.0475	0.0016	27.5	1.5	26.79	1.2	71	72
1361B-44	0.0274	0.0016	0.00431	0.00024	0.58835	0.046	0.0017	27.4	1.6	27.7	1.5	0	79
1361B-45	0.0267	0.002	0.00423	0.00021	0.53587	0.0456	0.0026	26.8	1.9	27.18	1.3	-20	120
1361B-46	0.0316	0.0031	0.00411	0.0002	0.4827	0.0547	0.0043	31.6	3	26.44	1.3	360	170
1361B-47	0.0279	0.0017	0.0042	0.00022	0.46865	0.048	0.0022	27.9	1.7	26.99	1.4	97	98
1361B-48	0.0284	0.0022	0.00431	0.00029	0.48463	0.0477	0.003	28.4	2.2	27.7	1.8	80	130
1361B-49	0.0275	0.0019	0.00441	0.00024	0.54978	0.0451	0.0022	27.6	1.9	28.37	1.5	-40	100
1361B-50	0.028	0.002	0.00417	0.00024	0.41802	0.0486	0.0027	28	2	26.8	1.5	120	120
1361B-51	0.0254	0.0016	0.00398	0.0002	0.48991	0.046	0.0018	25.5	1.5	25.61	1.3	5	85
1361B-52	0.0331	0.0026	0.00431	0.00022	0.40797	0.0554	0.0034	33	2.6	27.7	1.4	410	130
1361B-53	0.0292	0.0023	0.00455	0.00025	0.52336	0.0463	0.0029	29.2	2.3	29.3	1.6	10	130
1361B-54	0.027	0.0017	0.00427	0.00021	0.33069	0.0457	0.0021	27.1	1.6	27.48	1.3	-10	95
1361B-55	0.13	0.014	0.00511	0.00029	0.76953	0.181	0.013	123	12	32.9	1.8	2620	130
1361B-56	0.0284	0.0021	0.00421	0.00021	0.48568	0.0485	0.0027	28.4	2.1	27.07	1.3	110	120
1361B-57	0.0277	0.0018	0.00414	0.00025	0.33459	0.0486	0.0027	27.8	1.8	26.6	1.6	120	120
1361B-58	0.0296	0.0022	0.00434	0.00026	0.55156	0.0493	0.0027	29.6	2.2	27.9	1.7	150	120
1361B-59	0.0272	0.002	0.00411	0.00021	0.34625	0.0473	0.0028	27.2	1.9	26.46	1.4	60	120
1361B-60	0.027	0.0018	0.00419	0.00022	0.68836	0.0457	0.0019	27	1.8	26.97	1.4	-10	88
1361B-61	0.248	0.032	0.0353	0.0037	0.94366	0.0507	0.003	223	25	223	23	210	130
1361B-62	0.0275	0.0018	0.00435	0.00021	0.32996	0.0458	0.0024	27.6	1.8	27.96	1.4	-10	110
1361B-63	0.0268	0.0018	0.00428	0.00021	0.38219	0.0452	0.0022	26.9	1.7	27.53	1.3	-36	98
1361B-64	0.027	0.0023	0.0041	0.00023	0.28682	0.0477	0.0036	27	2.3	26.4	1.5	70	160
1361B-65	0.0283	0.0029	0.0044	0.00026	0.61362	0.0462	0.0035	28.3	2.9	28.3	1.6	0	150
1361B-66	0.029	0.0024	0.00422	0.00021	0.38919	0.0496	0.0036	29	2.4	27.13	1.4	150	150
1361B-67	0.029	0.0028	0.0046	0.00027	0.65315	0.0454	0.0031	29	2.8	29.6	1.7	-20	140
1681
1681-1	0.0272	0.0016	0.004101	0.0002	0.49203	0.0483	0.0019	27.3	1.6	26.38	1.3	107	86
1681-2	0.0287	0.002	0.00445	0.00024	0.47535	0.0469	0.0024	28.7	1.9	28.61	1.5	50	110
1681-3	0.0275	0.0019	0.00413	0.0002	0.022465	0.0486	0.003	27.5	1.9	26.54	1.3	120	130
1681-4	0.0271	0.0017	0.00419	0.00022	0.32109	0.0472	0.0023	27.2	1.7	26.96	1.4	60	100
1681-5	0.0289	0.0022	0.00425	0.00022	0.66119	0.0493	0.0024	28.9	2.1	27.37	1.4	150	110
1681-6	0.134	0.018	0.00525	0.00031	0.88864	0.181	0.018	127	16	33.8	2	2590	190
1681-7	0.0276	0.0016	0.00417	0.00021	0.62487	0.048	0.0018	27.6	1.6	26.83	1.3	95	83
1681-8	0.0382	0.0037	0.00436	0.00022	0.49994	0.0635	0.005	38.1	3.6	28.07	1.4	670	180
1681-9	0.0282	0.0021	0.004227	0.0002	0.50825	0.0484	0.0028	28.3	2.1	27.19	1.3	100	120
1681-10	0.0314	0.0035	0.00428	0.00024	0.77037	0.052	0.0038	31.4	3.4	27.53	1.5	260	160
1681-11	0.0275	0.0018	0.00429	0.00021	0.49624	0.0466	0.0021	27.6	1.8	27.61	1.4	32	97
1681-12	0.0282	0.0024	0.00405	0.00022	0.73147	0.0504	0.0028	28.2	2.3	26.05	1.4	200	120
1681-13	0.0271	0.0015	0.004262	0.0002	0.30454	0.0462	0.0017	27.1	1.5	27.42	1.3	11	80
1681-14	0.0281	0.0016	0.00429	0.00021	0.27933	0.0478	0.0019	28.2	1.6	27.6	1.4	85	89
1681-15	0.0412	0.0053	0.00463	0.00022	0.34135	0.0645	0.0075	40.9	5.1	29.76	1.4	640	230
1681-16	0.0269	0.0015	0.00418	0.00022	0.57663	0.0468	0.0015	26.9	1.5	26.88	1.4	42	70
1681-17	0.027	0.0019	0.00413	0.00021	0.43181	0.0475	0.0025	27	1.9	26.6	1.4	70	110
1681-18	0.0299	0.0026	0.00443	0.00026	0.60207	0.049	0.0029	29.9	2.5	28.5	1.7	130	130
1681-19	0.0283	0.0018	0.0044	0.00023	0.57188	0.0468	0.0021	28.3	1.8	28.29	1.5	38	93
1681-20	0.0289	0.0027	0.00423	0.0003	0.58811	0.0498	0.0047	28.9	2.7	27.2	1.9	160	190
1681-21	0.0263	0.0015	0.00411	0.00021	0.22563	0.0465	0.0021	26.3	1.5	26.46	1.3	26	96
1681-22	0.028	0.0018	0.00429	0.00021	0.53285	0.0473	0.0021	28	1.8	27.61	1.4	64	94
1681-23	0.0312	0.0021	0.00443	0.00026	0.71232	0.0512	0.0019	31.2	2.1	28.5	1.6	237	86
1681-24	0.0287	0.0025	0.00418	0.00022	0.099078	0.05	0.004	28.7	2.4	26.91	1.4	180	170
1681-25	0.028	0.002	0.00428	0.00023	0.52379	0.0476	0.0026	28.1	2	27.5	1.4	70	110
1681-26	0.034	0.004	0.00437	0.00029	0.42385	0.0565	0.0055	33.9	3.9	28.1	1.8	440	200
1681-27	0.0597	0.0084	0.00434	0.00025	0.72947	0.099	0.011	58.8	8	27.9	1.6	1550	240
1681-28	0.0287	0.0018	0.00437	0.00022	0.39853	0.0478	0.0022	28.7	1.7	28.08	1.4	83	99
1681-29	0.0286	0.0016	0.00428	0.00021	0.25636	0.0485	0.002	28.6	1.5	27.55	1.3	118	89
1681-30	0.0278	0.0019	0.00427	0.00023	0.21728	0.0487	0.0034	27.9	1.9	27.47	1.5	120	150
1681-31	0.029	0.003	0.00419	0.00023	0.6346	0.0501	0.0041	29.1	3	26.98	1.5	170	170
1681-32	0.0295	0.0038	0.00438	0.00027	0.37023	0.0489	0.0055	29.5	3.7	28.2	1.8	130	240
1681-33	0.0283	0.0019	0.00437	0.00023	0.40904	0.0471	0.0024	28.3	1.9	28.14	1.5	50	110
1681-34	0.0294	0.0025	0.00432	0.00023	0.16968	0.0495	0.0038	29.4	2.5	27.81	1.5	150	160
1681-35	0.0296	0.0039	0.00429	0.00035	0.3635	0.0499	0.0047	29.6	3.9	27.6	2.2	180	210
1681-36	0.0278	0.0019	0.00429	0.00024	0.47116	0.0471	0.0024	27.8	1.9	27.62	1.5	50	110
1681-37	0.0286	0.0016	0.00447	0.00023	0.52885	0.0465	0.0016	28.6	1.6	28.77	1.4	25	74
1681-38	0.0266	0.0018	0.00432	0.00023	0.31834	0.0449	0.0024	26.7	1.8	27.77	1.5	-50	110
1681-39	0.0275	0.0015	0.00418	0.00022	0.61475	0.0479	0.0016	27.5	1.5	26.88	1.4	90	76
1681-40	0.0304	0.0025	0.00416	0.00025	0.46923	0.0532	0.0035	30.4	2.4	26.8	1.6	320	150
1681-41	0.0271	0.0018	0.00425	0.00021	0.62388	0.0463	0.002	27.2	1.8	27.31	1.3	21	90
1681-42	0.0277	0.0016	0.004262	0.0002	0.20846	0.0473	0.0019	27.8	1.6	27.42	1.3	60	89
1681-43	0.0401	0.0034	0.00431	0.00024	0.67678	0.0675	0.0038	39.9	3.3	27.71	1.5	830	120
1681-44	0.0276	0.0017	0.0042	0.00021	0.47455	0.0478	0.002	27.7	1.7	27	1.4	86	92
1681-45	0.026	0.0017	0.00415	0.00021	0.65285	0.0454	0.0018	26.1	1.7	26.72	1.4	-22	83
1681-46	0.0285	0.0018	0.00428	0.00023	0.31547	0.0486	0.0023	28.6	1.8	27.52	1.5	120	100
1681-47	0.0274	0.0019	0.00411	0.00023	0.56078	0.0489	0.0026	27.5	1.9	26.44	1.5	180	140
1681-48	0.0268	0.0015	0.004174	0.00019	0.38537	0.0467	0.0018	26.9	1.5	26.85	1.2	32	83
1681-49	0.0281	0.0021	0.00427	0.00022	0.54535	0.0476	0.0025	28.1	2.1	27.49	1.4	80	110
1681-50	0.0272	0.0021	0.0043	0.00022	0.52853	0.0459	0.0024	27.3	2	27.67	1.4	-10	110
1681-51	0.0274	0.0021	0.00425	0.00023	0.053871	0.047	0.0033	27.4	2.1	27.33	1.5	50	150
1681-52	0.0267	0.0013	0.004184	0.0002	0.1857	0.0464	0.0017	26.75	1.3	26.91	1.3	21	76
1681-53	0.0271	0.0015	0.004146	0.0002	0.41133	0.0476	0.0018	27.2	1.5	26.67	1.3	74	80
1681-54	0.0275	0.002	0.00418	0.00023	0.66464	0.0476	0.0023	27.5	2	26.92	1.5	70	100
1681-55	0.0284	0.002	0.00435	0.00024	0.60177	0.0475	0.0024	28.5	2	28	1.5	70	110
1681-56	0.2349	0.012	0.0328	0.0017	0.90327	0.05206	0.00078	214.2	9.6	207.8	11	285	35
1681-57	0.0314	0.0031	0.00441	0.00026	0.58119	0.0515	0.0039	31.4	3.1	28.4	1.7	240	170
1681-58	0.0311	0.0029	0.00442	0.00024	0.45877	0.051	0.0038	31.1	2.8	28.42	1.5	220	160
1681-59	0.0322	0.0027	0.00416	0.00028	0.59401	0.0563	0.0032	32.2	2.7	26.7	1.8	440	130
1681-60	0.0276	0.0019	0.00433	0.00022	0.52567	0.0463	0.0022	27.7	1.9	27.84	1.4	20	100
727
0727-1	0.0269	0.0012	0.004105	0.00011	0.34783	0.0473	0.0017	26.94	1.2	26.41	0.71	64	75
0727-2	0.0275	0.0013	0.004245	0.00012	0.24609	0.0468	0.0019	27.5	1.3	27.31	0.76	41	86
0727-3	0.0276	0.0014	0.004197	0.00011	0.19945	0.0477	0.0022	27.7	1.4	27	0.74	78	96
0727-4	0.0272	0.0014	0.004187	0.00011	0.12783	0.0471	0.0022	27.2	1.4	26.93	0.73	49	95
0727-5	0.0273	0.0013	0.004125	0.00011	0.058528	0.0486	0.0022	27.4	1.3	26.53	0.7	113	93
0727-6	0.0279	0.0013	0.004229	0.00011	0.32127	0.0481	0.0019	27.9	1.3	27.2	0.72	94	85
0727-7	0.0265	0.0011	0.004188	0.00012	0.24658	0.0457	0.0015	26.5	1.1	26.94	0.74	-8	68
0727-8	0.0606	0.0078	0.0048	0.00015	0.64087	0.09	0.01	59.4	7.4	30.86	0.98	1220	230
0727-9	0.0267	0.0014	0.004208	0.00011	0.20495	0.046	0.0022	26.8	1.4	27.07	0.7	1	100
0727-10	0.0268	0.0014	0.004163	0.00011	0.11947	0.0466	0.0022	26.9	1.4	26.78	0.68	27	98
0727-11	0.0265	0.0018	0.004127	0.00012	0.072829	0.0467	0.003	26.6	1.8	26.55	0.74	30	120
0727-12	0.027	0.0014	0.004117	0.00011	0.33258	0.0476	0.0021	27.1	1.4	26.49	0.7	70	95
0727-13	0.0296	0.0017	0.004136	0.00011	0.30631	0.0526	0.0026	29.6	1.6	26.61	0.73	270	110
0727-14	0.02636	0.001	0.004176	0.00011	0.068342	0.0459	0.0015	26.41	0.99	26.86	0.71	-2	67
0727-15	0.0275	0.002	0.004127	0.00011	0.013503	0.0486	0.003	27.6	2	26.55	0.73	100	120
0727-16	0.0276	0.0013	0.004219	0.00011	0.050047	0.0476	0.002	27.7	1.2	27.14	0.73	74	90
0727-17	0.0272	0.0012	0.004193	0.00012	0.31652	0.0471	0.0017	27.3	1.2	26.98	0.75	51	79
0727-18	0.0308	0.0016	0.004158	0.00011	0.22619	0.0537	0.0023	30.8	1.5	26.75	0.72	320	98
0727-19	0.0281	0.0024	0.004215	0.00012	0.00098759	0.0483	0.0041	28.1	2.4	27.12	0.76	100	150
0727-20	0.0278	0.0016	0.00424	0.00011	0.19052	0.0474	0.0024	27.8	1.6	27.28	0.74	60	110
0727-21	0.0357	0.0029	0.004546	0.00013	0.64261	0.0577	0.0041	35.6	2.8	29.24	0.86	450	140
0727-22	0.0264	0.0012	0.004193	0.00011	0.016224	0.0456	0.0019	26.4	1.1	26.97	0.72	-15	84
0727-23	0.0276	0.0017	0.004171	0.00011	0.13702	0.0478	0.0027	27.6	1.7	26.83	0.7	80	120
0727-24	0.0316	0.0017	0.004407	0.00012	0.35462	0.0523	0.0028	31.6	1.6	28.35	0.8	250	110
0727-25	0.0268	0.0023	0.004152	0.00011	0.078635	0.0468	0.003	26.8	2.3	26.71	0.7	60	130
0727-26	0.0261	0.0011	0.004102	0.00011	0.30367	0.0462	0.0018	26.2	1.1	26.39	0.73	12	82
0727-27	0.0263	0.0013	0.004128	0.00012	0.17699	0.0462	0.0022	26.3	1.3	26.55	0.76	10	96
0727-28	0.0286	0.0014	0.004431	0.00012	0.4822	0.0467	0.0019	28.6	1.4	28.5	0.8	32	86
0727-29	0.0287	0.0017	0.00428	0.00012	0.20044	0.0489	0.0025	28.7	1.7	27.53	0.77	120	110
0727-30	0.0316	0.0054	0.004226	0.00013	0.48737	0.0541	0.0076	31.6	5.2	27.19	0.83	330	210
0727-31	0.0261	0.0011	0.004088	0.00011	0.21944	0.0464	0.0017	26.18	1.1	26.3	0.71	20	79
0727-32	0.0273	0.0014	0.00414	0.00011	0.34647	0.0479	0.002	27.4	1.4	26.63	0.73	84	89
0727-33	0.0267	0.0014	0.004263	0.00011	0.056151	0.0455	0.0021	26.7	1.4	27.42	0.73	-20	95
0727-34	0.0275	0.0013	0.004187	0.00011	0.20266	0.0476	0.0019	27.6	1.3	26.94	0.7	74	86
0727-35	0.0274	0.0013	0.004236	0.00011	0.043073	0.0468	0.002	27.4	1.3	27.25	0.73	37	90
0727-36	0.0319	0.0022	0.004281	0.00012	0.46993	0.054	0.0031	31.9	2.1	27.54	0.76	330	120
0727-37	0.0272	0.001	0.004183	0.00011	0.16085	0.047	0.0016	27.25	1	26.91	0.72	47	72
0727-38	0.028	0.0026	0.004186	0.00011	0.092817	0.0487	0.0041	28	2.5	26.93	0.72	120	140
0727-39	0.0267	0.0013	0.004095	0.00011	0.045548	0.0475	0.002	26.7	1.3	26.34	0.7	65	91
0727-40	0.0282	0.0012	0.004244	0.00012	0.20051	0.0482	0.0017	28.18	1.2	27.3	0.74	104	74
0727-41	0.0262	0.0013	0.004167	0.00011	0.042895	0.0458	0.0021	26.2	1.3	26.81	0.72	-7	93
0727-42	0.0285	0.0016	0.004302	0.00012	0.1307	0.0483	0.0025	28.5	1.6	27.67	0.78	100	110
0727-43	0.029	0.0014	0.00418	0.00012	0.22819	0.0503	0.0021	29	1.4	26.89	0.76	200	90
0727-44	0.0272	0.0012	0.004174	0.00011	0.091887	0.0473	0.0019	27.2	1.2	26.85	0.73	59	85
0727-45	0.02693	0.0012	0.004148	0.00011	0.23295	0.0475	0.0018	26.98	1.1	26.68	0.72	70	80
0727-46	0.0262	0.0084	0.004162	0.00015	0.28218	0.046	0.011	26.3	8	26.77	0.93	0	270
0727-47	0.0273	0.0019	0.004134	0.00012	0.032389	0.048	0.0027	27.3	1.9	26.59	0.76	90	110
0727-48	0.0273	0.0012	0.004226	0.00011	0.076728	0.047	0.002	27.4	1.2	27.19	0.71	46	87
0727-49	0.0277	0.024	0.004223	0.003	0.18263	0.0478	0.0023	27.8	21	27.17	19	80	99
0727-50	0.0277	0.0013	0.004155	0.00011	0.25203	0.0484	0.002	27.7	1.3	26.73	0.7	109	88
0727-51	0.0277	0.0014	0.00418	0.00011	0.093629	0.0484	0.0021	27.8	1.4	26.89	0.72	108	94
0727-52	0.0286	0.0012	0.004283	0.00011	0.23368	0.0487	0.0018	28.6	1.2	27.55	0.73	123	78
0727-53	0.02721	0.0011	0.004153	0.00011	0.13094	0.0478	0.0018	27.26	1.1	26.71	0.72	81	79
0727-54	0.0271	0.0014	0.004137	0.00011	0.35337	0.0477	0.0021	27.2	1.4	26.62	0.74	80	93
0727-55	0.0287	0.0016	0.004165	0.00012	0.31915	0.0504	0.0026	28.7	1.6	26.79	0.74	170	110
0727-56	0.0261	0.0013	0.004164	0.00011	0.51062	0.046	0.002	26.2	1.3	26.79	0.7	0	87
0727-57	0.027	0.0016	0.00437	0.00013	0.37207	0.0451	0.0024	27.1	1.7	28.12	0.82	-40	100
0727-58	0.0355	0.0039	0.004266	0.00012	0.71136	0.0601	0.0058	35.4	3.8	27.44	0.76	470	190
0727-59	0.0279	0.0015	0.004261	0.00012	0.097464	0.0478	0.0023	27.9	1.4	27.41	0.74	78	98
0727-60	0.02715	0.0012	0.004176	0.00011	0.022999	0.0474	0.0018	27.2	1.1	26.87	0.7	63	78
0727-61	0.0313	0.0015	0.0042	0.00011	0.25081	0.0544	0.0022	31.3	1.5	27.02	0.71	359	89
0727-62	0.0283	0.0013	0.004193	0.00012	0.008707	0.0493	0.0021	28.3	1.3	26.98	0.75	150	92
0727-63	0.0284	0.0014	0.004187	0.00011	0.023264	0.0496	0.0022	28.4	1.4	26.93	0.7	160	92
1259
1259-1	0.0286	0.0017	0.004353	0.00012	0.27492	0.048	0.0029	28.7	1.6	28	0.8	80	120
1259-2	0.0317	0.002	0.004505	0.00013	0.033908	0.0506	0.0031	31.7	1.9	28.98	0.81	220	130
1259-3	0.0274	0.0014	0.004423	0.00012	0.11165	0.0451	0.0023	27.4	1.4	28.45	0.79	-20	110
1259-4	0.0356	0.0045	0.004471	0.00013	0.17139	0.0595	0.0066	35.4	4.3	28.75	0.86	430	210
1259-5	0.0286	0.0016	0.004341	0.00012	0.046462	0.048	0.0023	28.7	1.5	27.92	0.77	90	100
1259-6	0.0281	0.0016	0.004473	0.00013	0.24095	0.0457	0.0023	28.2	1.6	28.77	0.82	-10	100
1259-7	0.045	0.0085	0.004477	0.00014	0.17437	0.073	0.012	44.5	8.1	28.8	0.9	800	260
1259-8	0.00489	0.00055	0.000738	2.6e-05	0.13073	0.0497	0.0058	4.95	0.55	4.76	0.17	90	230
1259-9	0.0281	0.0018	0.004264	0.00012	0.097027	0.0478	0.0028	28.1	1.8	27.43	0.75	70	120
1259-10	0.0488	0.0041	0.004682	0.00014	0.69305	0.0782	0.0051	48.3	3.9	30.11	0.9	1090	140
1259-11	0.0294	0.0017	0.004371	0.00012	0.02824	0.0488	0.0026	29.4	1.7	28.12	0.75	120	110
1259-12	0.0304	0.0035	0.00448	0.00013	0.31266	0.0493	0.0048	30.4	3.5	28.81	0.82	140	170
1259-13	0.0273	0.0015	0.004374	0.00012	0.04022	0.0449	0.0022	27.3	1.5	28.13	0.76	-30	100
1259-14	0.0296	0.0017	0.004514	0.00013	0.28287	0.0477	0.0025	29.6	1.7	29.03	0.86	70	110
1259-15	0.0298	0.0017	0.004502	0.00012	0.1672	0.0482	0.0025	29.8	1.6	28.96	0.78	90	110
1259-16	0.0295	0.0016	0.004552	0.00013	0.1118	0.0477	0.0026	29.5	1.6	29.28	0.82	70	110
1259-17	0.0303	0.0016	0.004489	0.00012	0.017661	0.0489	0.0024	30.3	1.6	28.87	0.78	130	100
1259-18	0.0284	0.0015	0.004416	0.00012	0.17635	0.0466	0.0022	28.4	1.5	28.49	0.83	25	98
1259-19	0.0282	0.0017	0.004413	0.00012	0.23761	0.0465	0.0025	28.2	1.7	28.38	0.78	20	110
1259-20	0.03	0.0018	0.004443	0.00013	0.4711	0.0493	0.0023	30	1.9	28.58	0.81	150	100
1259-21	0.0277	0.0013	0.004368	0.00012	0.050971	0.0462	0.002	27.8	1.3	28.1	0.76	12	91
1259-22	0.0276	0.0014	0.004399	0.00012	0.18044	0.0455	0.002	27.6	1.3	28.3	0.77	-20	88
1259-23	0.0293	0.002	0.004404	0.00013	0.35752	0.0481	0.0028	29.3	1.9	28.33	0.81	90	120
1259-24	0.0285	0.0014	0.004451	0.00014	0.16748	0.0466	0.0019	28.5	1.3	28.63	0.87	28	87
1259-25	0.0282	0.0016	0.00446	0.00012	0.17742	0.0461	0.0026	28.2	1.6	28.69	0.8	10	110
1259-26	0.0312	0.0022	0.004398	0.00012	0.24	0.0516	0.0029	31.2	2.1	28.29	0.8	240	120
1259-27	0.0285	0.0017	0.004374	0.00012	0.32764	0.0473	0.0022	28.5	1.7	28.14	0.75	60	110
1259-28	0.0282	0.0015	0.00436	0.00012	0.20967	0.0469	0.0022	28.2	1.5	28.04	0.8	38	97
1259-29	0.028	0.0085	0.00435	0.00015	0.18442	0.0469	0.011	28	8.1	28.01	0.97	40	270
1259-30	0.0291	0.0017	0.004434	0.00012	0.092592	0.0478	0.0027	29.1	1.7	28.52	0.78	70	120
1259-31	0.0291	0.0018	0.004435	0.00012	0.070324	0.0474	0.0028	29.1	1.8	28.53	0.79	50	120
1259-32	0.0301	0.0024	0.00439	0.00013	0.47501	0.0485	0.0033	30.1	2.3	28.26	0.84	110	140
1259-33	0.0277	0.0014	0.004378	0.00012	0.20912	0.0459	0.0021	27.7	1.4	28.16	0.78	-1	94
1259-34	0.0286	0.0016	0.004496	0.00012	0.10502	0.0462	0.0024	28.6	1.6	28.92	0.78	10	110
1259-35	0.0597	0.0059	0.004711	0.00015	0.48527	0.0914	0.0082	58.8	5.7	30.3	0.94	1400	230
1259-36	0.0292	0.0018	0.004358	0.00012	0.26064	0.0486	0.0027	29.2	1.8	28.03	0.77	110	110
1259-37	0.0501	0.006	0.004755	0.00015	0.47836	0.0759	0.0082	49.5	5.8	30.58	0.96	970	200
1259-38	0.0298	0.0019	0.00449	0.00013	0.047741	0.0482	0.003	29.8	1.9	28.88	0.82	90	130
1259-39	0.0295	0.0031	0.004501	0.00014	0.59556	0.0474	0.0042	29.5	3	28.95	0.89	70	160
1259-40	0.0299	0.0018	0.004431	0.00013	0.058837	0.049	0.0028	29.9	1.8	28.5	0.82	120	120
1259-41	0.0301	0.002	0.004599	0.00014	0.27214	0.0474	0.0032	30.1	2	29.58	0.88	70	140
1259-42	0.0289	0.0017	0.004389	0.00012	0.25708	0.0478	0.0025	28.9	1.7	28.23	0.79	80	110
1259-43	0.0301	0.0022	0.004442	0.00013	0.43742	0.0488	0.0031	30	2.2	28.57	0.81	110	130
1259-44	0.0292	0.002	0.004358	0.00013	0.18459	0.049	0.0034	29.2	1.9	28.03	0.83	110	140
1259-45	0.03	0.0018	0.004466	0.00012	0.045492	0.0488	0.0028	29.9	1.8	28.72	0.79	110	120
1259-46	0.0304	0.0018	0.00442	0.00012	0.1141	0.0499	0.0028	30.4	1.8	28.43	0.8	170	120
1259-47	0.0296	0.002	0.004445	0.00012	0.18548	0.0483	0.0031	29.6	2	28.59	0.78	90	130
1259-48	0.028	0.0016	0.004371	0.00012	0.094836	0.0465	0.0024	28	1.6	28.12	0.79	20	110
1259-49	0.028	0.0015	0.004404	0.00013	0.030315	0.0458	0.0022	28	1.5	28.33	0.81	10	100
1677
1677-1	0.0275	0.0013	0.004331	0.00012	0.15018	0.0462	0.002	27.5	1.3	27.86	0.77	13	90
1677-2	0.2594	0.0092	0.03648	0.001	0.57716	0.0518	0.0012	234	7.4	231	6.4	266	51
1677-3	0.03	0.0064	0.00439	0.00015	0.56899	0.0505	0.0087	30	6.5	28.21	0.93	190	200
1677-4	0.0276	0.0013	0.004307	0.00011	0.26042	0.0467	0.0019	27.6	1.3	27.7	0.73	32	87
1677-5	0.02804	0.0011	0.004436	0.00012	0.023034	0.046	0.0016	28.08	1.1	28.53	0.77	1	73
1677-6	0.0292	0.0014	0.004389	0.00012	0.027699	0.0485	0.0021	29.2	1.4	28.23	0.76	113	92
1677-7	0.0279	0.0013	0.004375	0.00011	0.085554	0.0463	0.002	27.9	1.3	28.14	0.73	17	90
1677-8	0.0279	0.0012	0.004336	0.00012	0.044799	0.0469	0.0018	27.9	1.2	27.89	0.76	57	87
1677-9	0.0282	0.0035	0.004507	0.00021	0.11124	0.0456	0.0033	28.2	3.4	28.99	1.3	-20	140
1677-10	0.0282	0.0013	0.00436	0.00012	0.10449	0.047	0.0019	28.2	1.3	28.05	0.75	44	84
1677-11	0.0293	0.0013	0.004341	0.00011	0.23155	0.0491	0.0018	29.3	1.2	27.92	0.73	140	79
1677-12	0.0299	0.0017	0.004365	0.00012	0.33463	0.0499	0.0024	29.9	1.6	28.08	0.74	170	100
1677-13	0.0275	0.0015	0.004383	0.00012	0.18351	0.0456	0.0022	27.5	1.4	28.19	0.76	-16	97
1677-14	0.0365	0.0045	0.004457	0.00014	0.33114	0.0619	0.0078	36.3	4.4	28.67	0.9	510	220
1677-15	0.0278	0.0012	0.004318	0.00012	0.013104	0.047	0.0019	27.8	1.2	27.78	0.74	45	86
1677-16	0.0283	0.0013	0.004325	0.00012	0.14969	0.0477	0.0021	28.4	1.3	27.82	0.77	75	94
1677-17	0.0286	0.0017	0.004318	0.00012	0.13304	0.0483	0.0026	28.7	1.6	27.77	0.74	100	110
1677-18	0.0293	0.0016	0.004402	0.00013	0.16749	0.0485	0.0023	29.3	1.6	28.32	0.82	110	100
1677-19	0.0351	0.015	0.004457	0.00019	0.08622	0.0574	0.017	35	14	28.67	1.2	460	290
1677-20	0.0316	0.0018	0.004394	0.00012	0.32199	0.0522	0.0026	31.5	1.8	28.26	0.76	270	110
1677-21	0.0375	0.0048	0.004333	0.00013	0.73984	0.0619	0.0068	37.2	4.6	27.87	0.84	500	200
1677-22	0.0299	0.0015	0.004366	0.00012	0.10864	0.0498	0.0022	29.9	1.5	28.08	0.74	166	95
1677-23	0.0282	0.0016	0.004427	0.00012	0.2249	0.0463	0.0023	28.3	1.6	28.47	0.79	10	100
1677-24	0.0321	0.0019	0.004389	0.00012	0.012352	0.0532	0.0029	32	1.9	28.23	0.78	300	110
1677-25	0.0276	0.0014	0.0044	0.00012	0.20791	0.0452	0.0019	27.6	1.4	28.3	0.76	-15	90
1677-26	0.028	0.0014	0.004295	0.00011	0.18446	0.0474	0.002	28	1.4	27.63	0.73	61	90
1677-27	0.028	0.0014	0.004408	0.00012	0.020309	0.0462	0.0022	28	1.4	28.35	0.76	8	98
1677-28	0.031	0.0018	0.004622	0.00015	0.1948	0.0487	0.0027	30.9	1.8	29.73	0.94	110	120
1677-29	0.0283	0.0013	0.004376	0.00012	0.24952	0.0469	0.0018	28.4	1.3	28.15	0.74	43	79
1677-30	0.0298	0.0016	0.004498	0.00013	0.027615	0.0484	0.0024	29.8	1.6	28.93	0.84	100	100
1677-31	0.0284	0.0015	0.004366	0.00012	0.03203	0.0474	0.0023	28.4	1.4	28.09	0.77	60	100
1677-32	0.0273	0.0013	0.004407	0.00012	0.001754	0.0451	0.002	27.4	1.3	28.35	0.79	-37	92
1677-33	0.0452	0.0056	0.00456	0.00014	0.70715	0.0708	0.0076	44.7	5.4	29.33	0.89	780	220
1677-34	0.0281	0.0015	0.004313	0.00012	0.18293	0.0474	0.0023	28.1	1.5	27.75	0.76	60	99
1677-35	0.0297	0.0016	0.004338	0.00013	0.16625	0.05	0.0025	29.8	1.6	27.91	0.85	170	110
1677-36	0.027	0.0013	0.004184	0.00011	0.11542	0.0469	0.002	27.1	1.2	26.91	0.72	40	88
1677-37	0.0481	0.0036	0.00464	0.00013	0.31593	0.075	0.0051	47.7	3.4	29.84	0.84	990	150
1677-38	0.033	0.002	0.004494	0.00013	0.24444	0.0532	0.0029	32.9	2	28.91	0.81	300	120
1677-39	0.0281	0.0013	0.004509	0.00012	0.20283	0.0452	0.0017	28.2	1.3	29	0.78	-34	78
1677-40	0.0275	0.0014	0.004312	0.00012	0.25366	0.0465	0.0021	27.6	1.4	27.74	0.76	20	91
1677-41	0.0282	0.0015	0.004309	0.00012	0.068691	0.0477	0.0022	28.3	1.4	27.72	0.74	75	99
1677-42	0.029	0.0015	0.004358	0.00012	0.083248	0.048	0.002	29	1.5	28.03	0.78	120	95
1677-43	0.0281	0.0012	0.004274	0.00012	0.034653	0.0478	0.0018	28.1	1.2	27.5	0.77	84	82
1677-44	0.0283	0.0013	0.004456	0.00013	0.24657	0.0467	0.002	28.3	1.3	28.66	0.85	29	88
1677-45	0.0288	0.0014	0.004349	0.00011	0.16601	0.0483	0.0022	28.8	1.4	27.98	0.74	101	98
1677-46	0.0278	0.0015	0.004416	0.00013	0.036704	0.046	0.0022	27.9	1.5	28.4	0.82	-1	98
1677-47	0.0291	0.0016	0.004413	0.00012	0.044687	0.0479	0.0024	29.1	1.5	28.38	0.78	80	110
1677-48	0.0287	0.0016	0.004451	0.00013	0.1966	0.047	0.0023	28.8	1.6	28.63	0.81	40	100
1677-49	0.0279	0.0013	0.004332	0.00012	0.051719	0.0469	0.002	28	1.3	27.87	0.75	43	89
1677-50	0.02829	0.0011	0.00429	0.00011	0.15726	0.0479	0.0016	28.32	1.1	27.6	0.72	90	74
1677-51	0.0273	0.0013	0.004232	0.00012	0.10938	0.047	0.002	27.4	1.3	27.22	0.76	45	89
1677-52	0.0284	0.0016	0.004333	0.00012	0.32378	0.0483	0.0026	28.5	1.6	27.87	0.77	90	110
1677-53	0.0296	0.0017	0.004438	0.00013	0.18233	0.048	0.0023	29.6	1.7	28.55	0.8	110	110
1677-54	0.0304	0.0016	0.004477	0.00012	0.23853	0.0493	0.0022	30.4	1.6	28.79	0.76	150	98
1677-55	0.0298	0.0019	0.004472	0.00013	0.092937	0.0486	0.003	29.8	1.9	28.77	0.86	130	130
1687
1687-1	0.0298	0.0015	0.004529	0.00012	0.017757	0.0474	0.0022	29.8	1.5	29.13	0.8	59	98
1687-2	0.0281	0.0013	0.004373	0.00012	0.24331	0.0463	0.0019	28.1	1.3	28.13	0.77	15	84
1687-3	0.0293	0.0015	0.004472	0.00012	0.02261	0.0474	0.0022	29.3	1.5	28.76	0.78	65	99
1687-4	0.0302	0.0016	0.00458	0.00013	0.29745	0.0475	0.0022	30.2	1.6	29.46	0.85	60	95
1687-5	0.0276	0.0017	0.004403	0.00012	0.1832	0.0452	0.0025	27.6	1.6	28.32	0.75	-40	110
1687-6	0.0356	0.0021	0.004488	0.00012	0.31761	0.0574	0.0027	35.5	2	28.87	0.77	470	110
1687-7	0.0291	0.0017	0.004383	0.00012	0.05014	0.048	0.0028	29.1	1.7	28.19	0.79	80	120
1687-8	0.02823	0.0012	0.004374	0.00012	0.029327	0.0471	0.0015	28.26	1.1	28.14	0.76	52	68
1687-9	0.0276	0.0015	0.004416	0.00012	0.35008	0.045	0.0021	27.7	1.5	28.4	0.76	-20	100
1687-10	0.0282	0.0014	0.004381	0.00012	0.24094	0.0465	0.002	28.2	1.4	28.18	0.78	26	88
1687-11	0.0284	0.0014	0.004316	0.00013	0.14548	0.0477	0.0018	28.5	1.3	27.76	0.84	76	81
1687-12	0.0377	0.0028	0.004443	0.00013	0.27845	0.06	0.0036	37.5	2.7	28.58	0.81	610	140
1687-13	0.0299	0.0033	0.004403	0.00014	0.4061	0.0504	0.0045	29.9	3.3	28.32	0.88	160	170
1687-14	0.0283	0.0014	0.004363	0.00012	0.14567	0.0469	0.0022	28.3	1.4	28.07	0.79	37	97
1687-15	0.0285	0.0017	0.004362	0.00012	0.044592	0.0471	0.0027	28.5	1.7	28.06	0.75	50	120
1687-16	0.0284	0.0018	0.004401	0.00012	0.3283	0.0465	0.0027	28.4	1.8	28.31	0.78	20	120
1687-17	0.031	0.011	0.0044	0.00016	0.010153	0.0514	0.014	31	10	28.3	1	240	280
1687-18	0.0285	0.0017	0.004442	0.00013	0.12555	0.0466	0.0027	28.5	1.6	28.57	0.81	20	110
1687-19	0.0274	0.0015	0.004378	0.00012	0.23907	0.0459	0.0022	27.4	1.5	28.16	0.79	-10	100
1687-20	0.0487	0.0049	0.00606	0.00037	0.88713	0.0571	0.0029	48.2	4.7	39	2.4	450	110
1687-21	0.0303	0.0028	0.004493	0.00013	0.000226	0.0491	0.0044	30.3	2.8	28.9	0.8	120	160
1687-22	0.0465	0.0034	0.004643	0.00013	0.26977	0.0722	0.0052	46.1	3.5	29.86	0.81	910	160
1687-23	0.0291	0.0015	0.004276	0.00012	0.37927	0.0492	0.0022	29.1	1.4	27.51	0.74	143	95
1687-24	0.0292	0.011	0.004422	0.00014	0.26212	0.048	0.015	29.2	10	28.44	0.92	90	290
1687-25	0.029	0.0013	0.004329	0.00012	0.12278	0.0486	0.002	29	1.3	27.85	0.78	120	90
1687-26	0.0452	0.02	0.00485	0.00022	0.61665	0.076	0.023	44.6	18	31.17	1.4	810	360
1687-27	0.0297	0.0018	0.004467	0.00012	0.22527	0.0481	0.0026	29.7	1.8	28.73	0.78	80	110
1687-28	0.0297	0.0016	0.004565	0.00013	0.0026076	0.0476	0.0025	29.7	1.6	29.36	0.82	70	110
1687-29	0.0316	0.0015	0.00455	0.00017	0.4682	0.0505	0.0019	31.6	1.5	29.3	1.1	200	80
1687-30	0.029	0.0018	0.004415	0.00012	0.015229	0.0478	0.0029	29	1.8	28.4	0.77	70	120
1687-31	0.0289	0.0027	0.004588	0.00014	0.0025309	0.046	0.0043	28.9	2.7	29.51	0.93	-30	180
1687-32	0.0297	0.0016	0.004351	0.00012	0.16613	0.0497	0.0025	29.7	1.6	27.98	0.79	160	110
1687-33	0.0289	0.0013	0.004416	0.00013	0.28372	0.048	0.002	28.9	1.3	28.41	0.8	89	87
1687-34	0.0287	0.0017	0.004358	0.00012	0.032505	0.0479	0.0027	28.7	1.7	28.03	0.75	80	120
1687-35	0.0311	0.0014	0.004483	0.00013	0.22756	0.0506	0.0019	31.1	1.4	28.83	0.82	226	89
1687-36	0.0292	0.0021	0.004412	0.00012	0.0054597	0.0476	0.003	29.2	2	28.38	0.79	100	120
1687-37	0.0294	0.0015	0.004442	0.00013	0.083002	0.0481	0.0022	29.4	1.5	28.57	0.8	92	98
1687-38	0.0289	0.0015	0.00446	0.00012	0.22191	0.047	0.0021	28.9	1.5	28.69	0.78	45	95
1687-39	0.0284	0.0016	0.004344	0.00012	0.2298	0.0477	0.0023	28.4	1.5	27.94	0.78	74	99
1687-40	0.0273	0.0016	0.004285	0.00011	0.25989	0.0456	0.0022	27.4	1.6	27.57	0.74	0	110
1687-41	0.145	0.015	0.0192	0.0019	0.96516	0.0551	0.0015	136	13	122	12	402	61
1687-42	0.0304	0.0019	0.004476	0.00012	0.22663	0.0491	0.0029	30.4	1.9	28.79	0.77	120	120
1687-43	0.0319	0.0018	0.004456	0.00013	0.085097	0.0522	0.0027	31.9	1.8	28.66	0.8	260	110
1687-44	0.0289	0.0018	0.004469	0.00012	0.056706	0.0466	0.0026	28.9	1.8	28.75	0.8	40	120
1687-45	0.109	0.013	0.00777	0.0008	0.94508	0.1007	0.0051	104	12	49.8	5.1	1597	97
1687-46	0.0288	0.0015	0.004334	0.00012	0.01107	0.0483	0.0023	28.8	1.4	27.88	0.76	100	100
1687-47	0.0285	0.0016	0.004367	0.00012	0.1241	0.0476	0.0025	28.6	1.6	28.09	0.76	70	110
1687-48	0.0296	0.0015	0.004428	0.00012	0.47095	0.0485	0.0019	29.6	1.5	28.48	0.8	110	89
1687-49	0.0287	0.0015	0.004456	0.00012	0.050977	0.0464	0.0022	28.8	1.5	28.66	0.77	40	100
1687-50	0.0308	0.0016	0.004423	0.00014	0.020258	0.0507	0.0023	30.8	1.5	28.45	0.87	200	95
1687-51	0.0293	0.0016	0.004415	0.00013	0.22752	0.0481	0.0023	29.3	1.6	28.4	0.8	90	100
1687-52	0.0308	0.0015	0.0045	0.00012	0.070574	0.0498	0.0023	30.8	1.5	28.94	0.79	170	98
1687-53	0.0383	0.0025	0.004489	0.00012	0.33135	0.0621	0.0035	38.1	2.5	28.87	0.79	640	110
1687-54	0.0295	0.0019	0.004414	0.00012	0.12208	0.0485	0.0029	29.5	1.8	28.39	0.79	100	120
1687-55	0.0341	0.0018	0.004415	0.00012	0.14118	0.0561	0.0027	34	1.8	28.4	0.78	420	110
1687-56	0.0322	0.0022	0.004537	0.00013	0.26869	0.0516	0.0031	32.2	2.1	29.18	0.84	220	120
17103
17103-1	0.0307	0.0018	0.004366	0.00012	0.020379	0.0509	0.0028	30.6	1.8	28.08	0.76	210	120
17103-2	0.0296	0.0019	0.004459	0.00013	0.19883	0.0477	0.0029	29.6	1.9	28.68	0.86	90	130
17103-3	0.029	0.0013	0.00437	0.00012	0.27931	0.0482	0.0018	29.1	1.3	28.11	0.78	96	81
17103-4	0.0278	0.0017	0.004358	0.00012	0.065987	0.0464	0.0027	27.9	1.7	28.03	0.78	10	120
17103-5	0.031	0.0031	0.004475	0.00013	0.025608	0.0503	0.0041	31	3	28.78	0.82	190	140
17103-6	0.0313	0.0019	0.004429	0.00012	0.10314	0.0512	0.0029	31.3	1.9	28.49	0.8	220	120
17103-7	0.0302	0.0026	0.004333	0.00013	0.25718	0.0504	0.0036	30.2	2.9	27.87	0.82	190	150
17103-8	0.0295	0.0017	0.004491	0.00013	0.10191	0.0478	0.0026	29.5	1.7	28.88	0.82	80	110
17103-9	0.029	0.0021	0.004496	0.00012	0.034263	0.0469	0.0033	29	2.1	28.91	0.8	30	140
17103-10	0.0335	0.0015	0.004796	0.00013	0.21998	0.0506	0.0019	33.4	1.5	30.84	0.85	205	83
17103-11	0.029	0.0012	0.004402	0.00013	0.074046	0.0478	0.0017	29	1.2	28.31	0.83	104	76
17103-12	0.0281	0.002	0.004399	0.00013	0.086044	0.0466	0.0033	28.1	2	28.3	0.86	10	140
17103-13	0.0387	0.003	0.004237	0.00012	0.66463	0.0654	0.0043	38.5	2.9	27.26	0.78	700	140
17103-14	0.0296	0.0018	0.004481	0.00012	0.092729	0.0478	0.0027	29.6	1.8	28.82	0.79	80	120
17103-15	0.0293	0.0014	0.004441	0.00012	0.23083	0.0478	0.0022	29.3	1.3	28.57	0.78	79	96
17103-16	0.0321	0.0031	0.004445	0.00013	0.024164	0.0523	0.0045	32.1	3	28.59	0.84	260	160
17103-17	0.0361	0.0063	0.004463	0.00014	0.41428	0.0585	0.0083	36	6	28.7	0.9	490	210
17103-18	0.0298	0.0017	0.0045	0.00014	0.23014	0.0476	0.0022	29.8	1.6	28.95	0.87	90	100
17103-19	0.0295	0.0014	0.004423	0.00012	0.20989	0.0483	0.0021	29.5	1.4	28.45	0.79	102	91
17103-20	0.0426	0.0048	0.004586	0.00014	0.47896	0.0668	0.0068	42.2	4.7	29.5	0.89	670	190
17103-21	0.0292	0.0017	0.004403	0.00012	0.16972	0.0481	0.0026	29.2	1.7	28.32	0.8	90	110
17103-22	0.109	0.012	0.00518	0.00018	0.72013	0.15	0.015	104	11	33.29	1.1	2190	200
17103-23	0.0284	0.0016	0.004418	0.00012	0.069062	0.0466	0.0024	28.5	1.6	28.42	0.75	20	110
17103-24	0.0316	0.002	0.004412	0.00012	0.0096562	0.052	0.0031	31.6	2	28.38	0.79	240	130
17103-25	0.0281	0.0016	0.004457	0.00012	0.18217	0.0457	0.0024	28.1	1.6	28.67	0.79	-20	100
17103-26	0.0296	0.0025	0.004572	0.00012	0.20771	0.047	0.0036	29.6	2.5	29.41	0.79	40	140
17103-27	0.0302	0.0018	0.004504	0.00013	0.047237	0.0482	0.0025	30.2	1.7	28.97	0.8	120	110
17103-28	0.0283	0.0016	0.004384	0.00012	0.12659	0.0469	0.0026	28.3	1.6	28.2	0.76	40	110
17103-29	0.0285	0.0013	0.00439	0.00012	0.14071	0.0469	0.0019	28.5	1.3	28.24	0.78	44	87
17103-30	0.0285	0.0015	0.004454	0.00012	0.0062622	0.0464	0.0022	28.6	1.5	28.65	0.78	17	97
17103-31	0.0275	0.0014	0.004293	0.00011	0.097863	0.0463	0.0021	27.5	1.4	27.62	0.74	60	110
17103-32	0.0298	0.0012	0.004566	0.00013	0.27564	0.0471	0.0016	29.81	1.2	29.37	0.83	53	70
17103-33	0.0279	0.0016	0.004327	0.00012	0.17025	0.046	0.0022	27.9	1.5	27.83	0.75	20	100
17103-34	0.0298	0.0019	0.004417	0.00013	0.11484	0.0488	0.0029	29.8	1.9	28.41	0.81	110	120
17103-35	0.0269	0.0015	0.004424	0.00013	0.29213	0.044	0.0022	26.9	1.5	28.45	0.8	-90	98
17103-36	0.0298	0.003	0.004349	0.00012	0.0337	0.0497	0.0046	29.8	2.9	27.97	0.78	150	160
17103-37	0.0301	0.0019	0.004462	0.00012	0.11012	0.0488	0.0028	30.1	1.8	28.7	0.78	110	120
17103-38	0.0303	0.0019	0.004618	0.00013	0.10373	0.0475	0.0028	30.2	1.8	29.7	0.82	60	120
17103-39	0.0288	0.0018	0.004423	0.00012	0.062891	0.0467	0.0025	28.8	1.7	28.45	0.8	50	120
17103-40	0.0286	0.0017	0.004402	0.00012	0.11069	0.0478	0.0029	28.6	1.7	28.32	0.8	70	120
17103-41	0.0298	0.0036	0.00454	0.00013	0.020122	0.0476	0.0052	29.8	3.5	29.2	0.86	70	180
17103-42	0.0313	0.002	0.004534	0.00014	0.3118	0.0499	0.0028	31.3	2	29.16	0.9	160	120
17103-43	0.0339	0.002	0.00476	0.00016	0.41086	0.0515	0.0025	33.8	2	30.61	1.1	230	110
17103-44	0.0293	0.0018	0.004474	0.00012	0.2735	0.0476	0.0026	29.3	1.8	28.78	0.79	70	110
17103-45	0.0314	0.0017	0.004367	0.00012	0.2104	0.0522	0.0025	31.4	1.7	28.09	0.78	263	100
17103-46	0.0285	0.0014	0.00439	0.00012	0.25068	0.0468	0.002	28.5	1.4	28.24	0.8	38	89
17103-47	0.0362	0.0025	0.004565	0.00013	0.33018	0.0573	0.0036	36.1	2.5	29.36	0.82	440	130
17103-48	0.0287	0.0017	0.004376	0.00013	0.016676	0.0477	0.0027	28.7	1.6	28.15	0.81	70	110
17103-49	0.0304	0.0017	0.004442	0.00012	0.040014	0.0493	0.0024	30.4	1.7	28.57	0.77	150	110
17103-50	0.0277	0.002	0.004447	0.00012	0.23639	0.0451	0.003	27.7	1.9	28.61	0.79	-40	130
17103-51	0.0302	0.0019	0.004551	0.00013	0.0040287	0.0483	0.003	30.2	1.9	29.27	0.86	90	120
17103-52	0.0293	0.0016	0.004516	0.00013	0.19585	0.047	0.0022	29.3	1.5	29.05	0.8	44	95
17103-53	0.0286	0.0086	0.004324	0.00015	0.020868	0.048	0.011	28.6	8.2	27.82	0.98	90	250
17103-54	0.0295	0.0016	0.004461	0.00012	0.31065	0.0479	0.0022	29.5	1.6	28.69	0.79	83	98

## Sheet: Table 5_CA-TIMS
	Dates (Ma)												Isotopic Ratios
KMC			206Pb/
	206Pb/	±2σ	238U	±2σ	207Pb/	±2σ	207Pb/	±2σ	Corr.	Th/	Pb*	Pbc	Pb*/	206Pb/	206Pb/		207Pb/		207Pb/
Fraction	238U a	abs	<Th> b	abs	235U a	abs	206Pb a	abs	coef.	U d	(pg) e	(pg) f	Pbc g	204Pb i	238U j	±2σ	235U j	±2σ	206Pb j	±2σ
727
zr41	27.4854	0.0313262	27.5828	0.0315882	27.637	0.0393757	40.8326	2.03823	0.807549	0.293089	58.2211	0.368897	157.825	9961.12	0.00427278	0.114217	0.0275921	0.144423	0.0468352	0.083971
zr33	27.5578	0.0134022	27.6564	0.01386	27.7123	0.0261856	41.1258	0	2.146	0.26095	34.0414	0.207191	164.3	10464.2	0.00428406	0.0487371	0.0276683	0.095786	0.046841	0
zr33a	27.5639	0.0103986	27.6625	0.0110112	27.7341	0.0277837	42.5019	2.21209	0.414637	0.261349	34.0536	0.198633	171.44	10916.7	0.004285	0.037806	0.0276903	0.101553	0.0468679	0.0913679
zr9	27.6656	0.010764	27.7636	0.0114266	27.8338	0.0246268	42.3711	1.92237	0.443559	0.276525	50.6875	0.252645	200.628	12717	0.00430085	0.038991	0.0277912	0.0896964	0.0468653	0.0790745
zr16	27.6893	0.0142239	27.7896	0.0150143	27.8676	0.02881	43.2708	2.07994	0.562136	0.270855	86.4992	0.536228	161.311	10244.6	0.00430454	0.0514802	0.0278255	0.104807	0.0469039	0.0807554
831
zr24	27.5076	0.0153353	27.6074	0.0161355	27.6006	0.0645965	35.7024	3.71826	1.33104	0.287761	21.0021	0.115739	181.461	11468.2	0.00427624	0.0558684	0.0275553	0.237236	0.0467558	0.151894
zr11	27.5644	0.0142241	27.6644	0.0150709	27.7113	0.0396943	40.4707	2.93355	0.58056	0.281288	34.8521	0.260182	133.953	8485.43	0.00428508	0.0517136	0.0276673	0.145206	0.046849	0.118291
zr3a	27.5869	0.0161152	27.6883	0.0166478	27.7253	0.0377064	39.7352	2.51825	0.703396	0.236208	53.629	0.276775	193.764	12425.4	0.00428859	0.0585413	0.0276815	0.137865	0.0468346	0.100163
zr3b	27.5903	0.0159461	27.6917	0.016482	27.734	0.0388005	40.1984	2.31069	0.860552	0.236282	51.7378	0.263999	195.978	12566.8	0.00428912	0.0579199	0.0276903	0.141822	0.0468437	0.0910119
zr2	27.6541	0.0197385	27.7519	0.0201165	27.7994	0.0466575	40.3776	3.44291	0.548466	0.280597	71.043	0.516421	137.568	8715.86	0.00429905	0.0715297	0.0277564	0.170144	0.0468263	0.143196
zr1	27.6651	0.016587	27.7632	0.0170154	27.8509	0.032015	43.9078	2.39116	0.513075	0.273567	44.1117	0.163632	269.579	17095.2	0.00430077	0.0600853	0.0278086	0.116535	0.0468955	0.0989704
zr6	27.7147	0.0141584	27.8133	0.0152782	27.853	0.0502727	39.8061	3.70202	0.648853	0.324545	17.5797	0.108104	162.619	10172.5	0.0043085	0.0511963	0.0278108	0.182979	0.046836	0.151323
1361B
zr22	27.5191	0.00970067	27.6186	0.0102297	27.5297	0.0633397	28.4481	4.91207	0.828896	0.237858	23.7611	0.209778	113.267	7269.23	0.00427803	0.0353259	0.0274835	0.233211	0.0465936	0.204371
zr7c	27.5862	0.0117194	27.6868	0.0126103	27.723	0.036409	39.5909	2.89689	0.430072	0.262344	20.3301	0.14693	138.366	8811.92	0.00428848	0.0425739	0.0276791	0.133133	0.0468318	0.11668
zr15c	27.5943	0.012597	27.6948	0.0134475	27.7273	0.0327625	39.27	2.42983	0.55901	0.26543	52.5122	0.245125	214.226	13621.1	0.00428974	0.0457484	0.0276835	0.11978	0.0468255	0.0962624
zr13	27.6326	0.0163539	27.7323	0.017154	27.8122	0.0583616	43.3568	4.69833	0.40225	0.29218	92.8322	1.3454	68.9999	4366.11	0.00429571	0.0593103	0.0277695	0.212729	0.0469056	0.193839
zr5	27.6669	0.030045	27.7651	0.0302859	27.7842	0.0579097	37.9334	4.63288	0.413409	0.273183	53.6568	0.296595	180.909	11480.7	0.00430106	0.108829	0.027741	0.211292	0.0467785	0.193042
zr3	27.6693	0.0537238	27.768	0.0538285	27.5626	0.0896982	18.268	4.64686	0.851066	0.257685	25.1049	0.225472	111.344	7106.83	0.00430142	0.194581	0.0275168	0.329872	0.0463964	0.192905
1361A
zr27	27.6212	0.0379979	27.7192	0.0381808	27.6571	0.0712971	30.7789	4.3133	0.761903	0.276066	48.1157	0.314073	153.199	9718.22	0.00429393	0.137863	0.0276125	0.261316	0.0466389	0.179404
zr34	27.6644	0.0140865	27.7645	0.0149197	27.7758	0.038109	37.4215	2.8219	0.566984	0.277371	95.7434	0.686784	139.408	8840.55	0.00430066	0.0510284	0.0277325	0.139088	0.0467894	0.113374
zr8d	27.7117	0.0194562	27.8115	0.0201121	27.8639	0.042463	41.0094	2.89104	0.653569	0.287628	100.242	0.845296	118.588	7500.65	0.00430803	0.0703603	0.0278218	0.154495	0.0468596	0.11646
zr5a	27.7758	0.0516152	27.8745	0.0519289	27.8993	0.0636551	38.5506	2.92907	0.849674	0.322066	44.4907	0.224798	197.914	12385.2	0.00431802	0.186229	0.0278576	0.231309	0.0468114	0.118051
zr37	27.869	0.00846661	27.9693	0.00973288	28.0148	0.0422065	40.5346	3.36	0.486744	0.270855	86.2322	0.768971	112.14	7127.76	0.00433254	0.0304457	0.0279745	0.152746	0.0468503	0.136689
zr43	28.0074	0.0277903	28.1071	0.0282609	28.143	0.0736536	39.7418	5.54288	0.504449	0.290869	74.6265	1.15137	64.8156	4104.26	0.00435409	0.0994406	0.0281043	0.265355	0.0468347	0.229418
zr45	28.0333	0.0254027	28.1327	0.0259638	28.1318	0.0391538	36.55	2.1631	0.78015	0.302965	128.914	0.671637	191.94	12077.2	0.00435814	0.0908133	0.028093	0.141117	0.0467723	0.0843686
zr1a	28.7623	0.0169825	28.8594	0.0174647	28.9978	0.0696089	48.5579	5.01813	0.647056	0.299214	18.7988	0.166985	112.578	7097.51	0.00447172	0.0591762	0.0289702	0.243493	0.0469868	0.209603
1677
zr9	28.8721	0.00455553	28.964	0.00754291	29.0514	0.0286973	43.9027	2.31953	0.276184	0.433465	38.2479	0.25034	152.784	9274.76	0.00448883	0.0158137	0.0290245	0.100201	0.0468954	0.0959411
zr32	29.1298	0.0617826	29.2234	0.0623807	29.2939	0.0659366	42.7719	1.82437	0.942595	0.485865	87.6497	0.421636	207.88	12435.2	0.00452899	0.212573	0.0292703	0.228349	0.0468941	0.0690986
zr28	29.2459	0.00723505	29.3393	0.0113711	29.4367	0.0916957	45.0338	7.29546	0.466876	0.494742	16.0817	0.338777	47.4698	2846.96	0.00454708	0.0247948	0.029415	0.316039	0.0469385	0.303531
17103
zr15	29.2546	0.0288668	29.343	0.0297305	29.325	0.15819	35.1035	11.8399	0.598449	0.522604	16.534	0.41252	40.0804	2389.41	0.00454843	0.0988987	0.0293019	0.547263	0.0467232	0.494254
zr31	29.3656	0.0108955	29.4587	0.0140954	29.5225	0.0678704	42.3109	5.38958	0.287544	0.503907	9.68538	0.145587	66.5263	3972.94	0.00456573	0.0371876	0.0295021	0.233252	0.0468851	0.223055
zr10	29.3666	0.0138722	29.4592	0.0166473	29.6383	0.0490912	51.7147	3.71679	0.392182	0.518426	12.2427	0.115992	105.548	6267.28	0.00456588	0.0473456	0.0296194	0.168064	0.04707	0.152311
zr10a	29.4281	0.00445611	29.5181	0.0080113	29.592	0.0600778	42.9181	4.83462	0.284084	0.480395	13.7453	0.188532	72.9069	4379.76	0.00457547	0.015177	0.0295725	0.205993	0.0468761	0.201685
a Isotopic dates calculated using the decay constants lambda238 = 1.55125E-10 and lambda235 = 9.8485E-10 (Jaffey et al. 1971).
b Corrected for initial Th/U disequilibrium using radiogenic 208Pb and Th/U[magma] specified.
c % discordance = 100 - (100 * (206Pb/238U date) / (207Pb/206Pb date))
d Th contents calculated from radiogenic 208Pb and the 207Pb/206Pb date of the sample and assuming concordance between U-Th and Pb systems.
e Total mass of radiogenic Pb.
f Total mass of common Pb.
g Ratio of radiogenic Pb (including 208Pb) to common Pb.
h Th/U ratio of magma from which mineral crystallized.
i Measured ratio corrected for fractionation and spike contribution only.
j Measured ratios corrected for fractionation and tracer and blank.

## Sheet: Table 7_LA-ICP-MS-Tracing
	P_ppm	Ti_ppm	Sr_ppm	Y_ppm	Nb_ppm	La_ppm	Ce_ppm	Pr_ppm	0 _ppm	Sm_ppm	Eu_ppm	Gd_ppm	Tb_ppm	Dy_ppm	Ho_ppm	Er_ppm	Tm_ppm	Yb_ppm	Lu_ppm	Hf_ppm	Ta_ppm	Pb_ppm	Pb_ppm	Th_ppm	U_ppm
1361A	4900	2.97	41	605	1.58	46	106	12.5	55	11.2	1.21	18.1	4.48	50.7	19.43	91.2	22.39	232.8	46.7	11300	1.22	23.85	1.23	399	1495
1361A	88.3	2.77	0.216	486	1.4	0	16.67	0.0282	0.44	1.11	0.553	6.8	2.5	33.1	14.66	76.5	20.3	231	49.8	11100	0.694	10.3	0.55	204.4	590
1361A	2500	3.01	21	717	2.27	24	60	6.4	28	6.1	0.85	14.1	4.37	53.9	22.66	114.6	29.01	315.3	66.3	11440	1.64	19.44	0.78	237	1241
1361A	143	2.23	0.4	628	1.81	0.5	9.33	0.182	1.38	2.28	0.523	11.13	4.04	48.4	19.52	94.7	23.49	245.6	48.6	11230	1.37	25.3	1.1	453	1607
1361A	76	4.54	0.19	655	1.67	0	25.1	0.076	0.99	2.26	1.01	12.17	3.98	50.4	20.72	100.2	26	279.7	57.7	10880	0.865	13.07	0.94	358	843
1361A	197	2.03	0.61	617	2.18	0.141	14.25	0.066	0.74	1.52	0.641	10.39	3.5	46.9	19.07	92.6	23.9	258	50.8	11610	1.36	22.7	1.04	382	1414
1361A	138	4.26	0	678	2.15	0	24.3	0.067	0.98	2.07	0.87	11.5	4.02	49.9	21.1	106.9	28	301	63.8	10210	1.14	13.13	0.774	281	726
1361A	2400	2.26	16.3	494.7	1.25	21	51	5.6	25	5.9	0.75	11.3	3.27	38.5	15.66	74.8	19.39	209.5	41.7	11690	1.083	19.06	0.841	252.2	1215
1361A	80.6	4.87	0.82	752	2.78	0.26	35.1	0.135	1.19	2.5	0.94	13.2	4.59	58	23.6	114	29.2	323	65	11080	1.34	16.86	1.51	501	1116
1361A	149	2.49	0.62	512	1.22	0.78	7.5	0.2	1.59	1.73	0.379	8.93	3.07	40.3	16.1	80.2	20.22	214	42.75	11530	1.086	19.73	0.685	265	1242
1361A	2260	2.42	13	488	1.28	18.5	44	4.4	18	4	0.65	9.7	3.13	35.6	14.87	77.6	19.59	215.9	44.1	12120	1.073	17.95	0.83	229.7	1165
1361A	126	4.25	0.55	1036	2.37	0.065	30	0.145	2.09	4.33	1.49	20.5	6.93	83.6	32.6	159.7	39	418	82.1	10460	1.168	16.92	1.34	480	1050
1361A	86.7	2.87	0	417	1.04	0.041	7.01	0.042	0.57	1.27	0.316	6.99	2.54	31.2	12.83	65.5	16.75	184.9	37.7	11060	0.874	16.37	0.594	239.3	1042
1361A	1519	12.7	0.46	3915	1.13	0.019	1.068	0.113	2.18	6.84	0.131	56.6	23	301.9	121.5	546	121.1	1126	194.3	12350	0.663	98.6	2.51	59.8	339.1
1361A	80.5	2.38	0	554	1.77	0	9.29	0.039	0.59	1.52	0.501	9.18	3.34	42.4	17.59	86.8	21.88	230.7	46.5	11510	1.155	21.01	0.71	293.5	1294
1361A	146	2.37	1.22	637	2.41	0.66	21.4	0.21	1.91	1.74	0.758	10.32	3.79	48.3	20.24	99.3	25.61	275	56.5	11330	1.221	21.31	1.23	471	1357
1361A	60.7	1.64	0.14	273	0.8	0	3.93	0.0164	0.231	0.71	0.178	3.91	1.44	19.6	8.4	43.3	11.57	131.3	27.1	12370	0.795	8.95	0.204	84.2	507
1361A	162	2.97	0.239	1373	3.74	0.043	28.1	0.141	2.18	4.93	1.82	26.8	8.98	112.8	45.1	213.6	51.9	537	105.8	11220	1.69	27.22	1.57	633	1690
1361A	83.2	2.74	0	520	1.3	0	6.69	0.035	0.464	1.11	0.357	7.79	2.861	37.11	15.94	82.2	21.62	241.3	51.7	10940	1.115	13.81	0.438	175.8	847
1361A	518	2.6	2.3	500	1.19	1.65	10.3	0.47	2.19	1.88	0.372	8.73	3.12	39.2	15.32	77	19.91	215.4	42	11870	1.16	20.43	0.63	283	1357
1361A	95	5.46	0.46	2380	7.61	0.069	203	0.564	8.05	10.46	4.29	46	13.86	157.6	62.4	296	70.3	707	137.9	8760	1.24	42.7	7.38	3320	2660
1361A	81.6	2.61	0.25	575	2.08	0	20.28	0.033	0.77	1.6	0.632	9.36	3.3	41.8	17.73	90.7	23.14	259	54	11510	1.173	21.71	1.38	483	1275
1361A	207	5.15	0.338	2940	18.99	0.051	70.6	0.265	4.72	11.28	3.96	59.9	20.04	236	86.3	378	85.3	803	142.5	10610	4.59	65.2	7.06	3050	4130
1361A	81	2.24	0.299	491	1.33	0	7.75	0.034	0.52	1.5	0.414	8.01	2.75	36.2	15.15	77.8	19.88	221	46.1	10920	1.161	16.49	0.634	229	1036
1361A	93.9	3.16	0.207	613	1.73	0.0114	17.97	0.041	0.67	1.74	0.685	9.54	3.47	44.6	18.6	97	25.58	279.2	59.3	10850	1.157	12.29	0.596	241.7	754
1361A	1500	2.77	12	496	1.54	15.2	36	3.8	15.7	3.9	0.57	9.41	3.09	39.2	15.76	77.9	20.18	213.7	42.5	11700	1.097	20.02	0.71	226.8	1249
1361A	111.1	2.65	0.28	956	4.24	0	22.55	0.047	0.92	2.49	0.985	16.65	5.95	74.4	30.35	149.8	37.4	388	77.7	11840	2.327	25.3	1.26	471	1595
1361A	240	2.08	1.27	447	1.19	1.42	11.5	0.5	2.6	1.56	0.432	7.37	2.52	32.67	13.86	70.7	17.95	195	40.93	11640	1.05	18.04	0.658	251.2	1144
1361A	143	3.18	1	763	2.21	0.69	25.2	0.27	2.09	2.34	1.008	12.7	4.54	56.1	23.3	118.6	29.7	324	68.5	11200	1.024	17.12	0.996	411.6	1065
1361A	74.6	2.23	0	590	1.63	0	5.39	0.024	0.61	1.43	0.388	8.44	3.33	42.9	18.03	93.1	24.45	269.8	56	11750	1.401	15.88	0.376	166.6	990
1361A	56.8	2.66	0	341	1.04	0	11.52	0.0136	0.42	0.72	0.388	4.68	1.85	24.13	10.59	55	14.63	161.9	34.6	11680	0.804	6.91	0.331	114.1	380
1361A	116	2.64	0.26	623	1.91	0.109	8.37	0.043	0.64	1.39	0.446	9.99	3.7	47.7	19.64	97.8	24.56	263.1	53	11950	1.469	24.82	0.843	306.5	1582
1361A	631	2.15	3.7	514	1.41	4.79	15	1.04	4.89	2.14	0.441	9	3.17	39.1	15.87	78.7	20.05	213.8	42.77	11350	1.086	19.92	0.614	249.6	1230
1361A	320	2.35	0.99	529.3	1.26	0.78	7.9	0.28	1.51	1.62	0.283	8.87	3.1	40	16.49	82.2	20.81	220.8	44.47	11750	1.163	20.35	0.766	252.1	1265
1361A	420	3.69	1.5	1021	2.62	2.4	35.5	0.74	4.6	4.45	1.58	20	6.63	81.4	32.1	158.5	40.1	421	84.3	10910	1.22	19.09	1.4	511	1187
1361A	84.1	1.74	0	544	1.55	0	8.45	0.0258	0.61	1.69	0.411	8.62	3.21	39.8	16.52	84.2	21.15	234.5	48.42	11710	1.228	17.95	0.631	262.2	1150
1361A	130	1.82	0.53	475	1.33	0.58	7.7	0.151	1.15	1.44	0.355	8.23	2.82	35.6	14.79	74.5	19.44	206.7	42.5	11550	1.037	18.75	0.605	247.8	1179
1361A	79.7	1.84	0	539	1.39	0	5.32	0.03	0.59	1.45	0.303	8.72	3.15	39.5	16.9	84.6	21.53	232.8	47.26	11350	1.082	18.04	0.517	219.2	1133
1361A	192	2.93	0.34	1090	3.86	0	25.7	0.058	1.33	3.11	1.18	19.2	6.58	85.5	35.1	174	44.1	463	90.9	11280	1.97	23.6	1.29	554	1540
1361A	74.8	1.82	0	410	1.16	0	7.57	0.0141	0.57	1.2	0.319	6.29	2.37	29.8	12.46	63.4	16.87	184.8	37.85	11480	0.966	16.12	0.584	223.2	1023
1361A	640	1.62	1.8	611.5	1.68	2.3	10.6	0.63	2.8	1.55	0.437	9.68	3.46	44.9	19.16	95.6	24.27	270.2	56.1	11230	1.463	16.12	0.561	176	1015
1361A	350	62	0.4	2100	1.83	0.09	4	0.256	4.24	9	0.431	50.2	16.9	197.3	71.9	296	59.9	516	87.8	10150	0.903	40.1	3.68	183.2	304
1361A	70	2.34	0.21	351.5	1.14	0.146	6.5	0.051	0.399	0.74	0.24	5.23	1.96	25.1	10.63	54.3	14.7	162.8	33.74	12170	0.856	12.2	0.426	141.9	740
1361A	0	3.16	0.28	599	2.05	0	21.7	0	0.62	1.45	0.641	8.38	3.14	41.3	17.83	96.9	26.6	300	64.3	10820	0.998	11.79	0.693	244.8	735
1361A	740	5.03	6.1	1453	3.11	7.6	43.2	1.91	10.5	6.86	2.11	29.7	9.74	119.7	46.6	221	53	544	108.9	11020	1.6	25.7	1.87	641	1498
1361A	146	2.11	0.26	779	3.79	0.16	7.32	0.05	0.7	1.74	0.454	11.24	4.78	62.5	25.22	121	29.12	300.7	58	12700	3.23	46.7	0.93	370	2997
1361A	410	2.59	1.52	493	1.29	1.27	9.2	0.51	2.7	1.88	0.336	8.57	3.03	38.1	15.59	76.6	19.7	207.4	41.17	11760	1.055	20.19	0.579	257.9	1306
1361A	76	2.57	0.216	446	1.17	0	7.07	0.022	0.459	1.39	0.301	7.22	2.63	32.1	13.67	69.3	18.26	198.1	41.6	11120	0.959	17.42	0.524	225	1044
1361A	214	2.65	0.94	505	1.37	1.2	11.4	0.31	1.58	1.79	0.511	8.19	2.98	37.9	15.52	79.1	20.88	226.4	45.5	11480	1.24	22.58	0.898	334.8	1442
1361A	119	2.35	0.44	1232	1.4	0.21	11.62	0.157	2.4	5.39	1.5	26.7	9.03	106.5	40.26	185.9	44.81	452	87.3	11260	1.072	22.43	1.045	425.1	1431
1361A	1410	3.1	14.7	579	1.52	40.2	44.8	4.41	18.3	4.17	0.561	12.3	3.69	45.9	18.2	92.9	22.2	244	44.6	12700	1.35	21.5	0.76	330	1650
1361A	158.8	3.62	0.38	1089	3.75	0.163	21.4	0.104	1.4	3.34	1.22	18.6	6.87	85.7	34.5	170	41.3	436	86.8	11740	1.86	23.6	1.28	505	1520
1361A	102	2.25	0.34	493	1.22	0.18	7.4	0.074	0.79	1.33	0.39	8.28	2.92	36.1	15.06	76.8	19.7	209.3	43.5	11340	1.076	20.03	0.707	284	1266
1361A	70.1	2.4	0.25	603	1.99	2.6	8.14	0.02	0.73	1.7	0.48	8.5	3.45	43.4	19.09	96.2	25.1	295	60.1	12270	1.44	15.38	0.51	205.3	1044
1361A	86	2.36	0.189	622	1.91	0	7.16	0.02	0.52	1.16	0.416	9.21	3.53	46.3	19.22	99.3	26.34	286.5	58.9	11480	1.48	16.15	0.465	173.6	1016
1361A	86.6	3.67	0.39	738	1.87	0.049	15.8	0.08	1	2.14	0.96	12.7	4.18	54.1	21.6	109.1	29.3	320	63.4	11600	1.14	12.11	0.607	241	805
1361A	97.4	3.52	0.223	902	2.71	0.112	22.92	0.105	1.29	2.59	0.99	15.2	5.29	68.2	28.1	143.4	37.1	405	83.9	11160	1.39	20.5	1.16	470	1298
1361A	95	2.43	0.207	592	1.98	0	12.03	0.0181	0.81	1.47	0.554	9.48	3.61	45.6	18.78	92.9	23.49	249.5	49.2	11400	1.243	20.24	0.69	306.2	1246
1361A	146	2.86	0.3	856	2.41	0.076	14.45	0.076	1.03	2.32	0.94	15.7	5.57	69.1	27.1	132.1	33.24	344.3	69	10780	1.18	18.2	0.728	263	1105
1361A	92.5	2.39	0.34	1067	6.89	0.0026	14.17	0.0227	0.51	1.64	0.649	13.06	5.43	76.2	33.1	171.4	44.7	493	101.1	12000	2.95	30.4	0.833	298.7	1864
1361B	100.7	2.07	0	595	1.99	0	10.14	0.028	0.55	1.7	0.559	9.62	3.53	46.2	18.89	93.1	23.61	249.4	50.4	11570	1.4	23.38	0.926	354	1423
1361B	120	3.11	0.31	553	1.64	0.046	18.69	0.026	0.71	1.54	0.668	7.34	2.8	37.2	16.25	86	23.06	269.5	58.1	11040	0.738	12.11	0.494	240	753
1361B	81.6	1.41	0.223	600	1.77	0	7.33	0.0178	0.52	1.63	0.429	9.48	3.45	45.5	18.71	94.5	24.58	262.7	53.6	11200	1.42	18.03	0.557	214.8	1126
1361B	51.6	2.77	0.27	809	1.19	0	15.2	0.048	0.99	2.56	1.27	14.2	4.8	59.5	24.6	123.1	32	355	75.2	11890	0.604	15	0.81	333	914
1361B	96.9	2.41	0.22	649	1.99	0	9.57	0.032	0.52	1.64	0.587	10.14	3.83	47.7	20.33	100.1	26.37	279	57.3	11850	1.53	19.24	0.705	268	1242
1361B	9400	5.9	94	650	1.81	176	370	43	182	33	4.9	31.6	5.9	52	19.2	96	23.9	261	58.6	10940	0.51	17.2	4.28	310	778
1361B	115	2.74	0.25	629	2.12	0	14.45	0.036	0.69	1.89	0.633	10.68	3.9	49.1	20.39	97.5	24.44	257.3	52.1	11370	1.37	23.14	0.979	408	1406
1361B	86.2	2.22	0.21	477	1.35	0	6.05	0.028	0.64	1.41	0.344	8.63	2.96	36.15	14.81	72.3	18.78	198.9	40.26	11230	1.013	19.6	0.67	239.3	1195
1361B	80.2	3.16	0	553	1.53	0	20.68	0.041	0.78	1.5	0.583	8.21	2.94	38.6	16.73	86.6	23.58	264	58	10850	0.961	12.99	0.716	277	812
1361B	890	2.45	6.9	615	1.98	7.7	28.1	2.1	9.7	3.69	0.762	11.32	3.83	47.4	19.77	95.7	23.79	248.4	50.26	11550	1.314	20.27	0.867	315.9	1284
1361B	95.1	2.11	0.317	542	1.72	0.028	9.4	0.049	0.87	1.66	0.51	9.75	3.34	42.6	17.44	86.3	21.93	228.9	45.7	11340	1.205	19.63	0.713	300.8	1264
1361B	119.9	4.07	0.263	740	2.29	0	24.18	0.048	0.95	2.18	0.921	12.12	4.09	51	22.02	114.1	30.03	331.1	70.8	10240	0.999	13.83	0.803	296.9	819
1361B	85.5	2.51	0.18	580	1.98	0	9.18	0.033	0.52	1.43	0.519	9.24	3.44	43.4	18.25	90.6	23.34	249.8	49.8	11410	1.255	18.46	0.592	240.7	1174
1361B	84.5	3.48	0.29	637	2.21	0.059	18.5	0.048	0.74	2.02	0.703	10.79	3.71	47	19.57	100.6	26.07	283.2	59.8	10880	1.235	12.77	0.671	265	790
1361B	86.9	2.21	0.285	512	1.37	0	6.91	0.0158	0.49	1.42	0.373	8.68	3.22	39.82	15.98	79	20.24	210.1	42.72	11720	1.179	21.1	0.632	279.2	1386
1361B	80.6	2.74	0	635	1.91	0	7.21	0.032	0.52	1.48	0.486	9.54	3.56	47	19.61	102.1	26.99	293.7	60	11180	1.404	16.65	0.538	191.8	1061
1361B	5300	2.15	41	630	1.88	43	98	11	48	9.7	1.23	15.1	4.24	48.5	19.98	97.4	26.18	279.7	57.9	11340	1.509	15.86	0.71	173.9	987
1361B	117.4	3.16	0.24	1082	1.67	0	24.5	0.161	2.76	5	1.89	24.2	7.6	88.8	34.6	165	40.1	427	83.5	10490	0.921	15.6	1.11	448	958
1361B	590	2.14	3.5	565	1.66	4.1	15	1.05	4.8	2.14	0.443	9.82	3.53	42.6	17.58	85.4	21.29	223.1	46.1	11560	1.21	23.65	0.803	320.7	1515
1361B	91.7	2.08	0.37	740	2.46	0	9.06	0.043	0.64	1.76	0.587	11.64	4.22	55.6	23.47	118.8	30.82	334.4	69	11100	1.681	19.79	0.587	234.7	1226
1361B	103	3.7	0.44	556	1.43	0.035	8.26	0.058	0.66	1.32	0.438	10.09	3.39	42.8	17.92	86.1	21.42	222.5	46.1	10960	1.15	20.63	0.8	282.6	1194
1361B	910	2.63	4.9	490	1.44	5.9	21.1	1.64	6.9	3.31	0.563	8.97	3.23	40	16.25	76.4	19.61	205.3	41.6	11500	1.22	18.72	0.77	260.1	1235
1361B	930	2.49	6.9	514	1.25	8.2	24	2.2	10.5	3.08	0.482	9.76	3.3	39.9	15.89	78.6	20.07	213.2	41.96	11430	1.07	18.54	0.668	240.1	1173
1361B	211	3.08	0.61	542	1.39	0.71	16.2	0.15	1.3	1.96	0.67	9.9	3.34	41.9	17.2	86.3	21.8	234	48.6	10540	0.84	9.71	0.54	189	525
1361B	380	2.85	2.6	588	1.78	2.2	22.5	0.65	3	2.04	0.645	9.55	3.48	43.7	18.35	91.7	23.86	260.9	55	11580	1.108	20.18	0.94	371.5	1275
1361B	121.8	8.4	3.4	1130	1.81	0.39	20.7	0.279	3.72	5.15	1.84	26.1	8.14	95.7	36.2	169.8	39.9	394	80.3	9050	0.816	15.8	1.95	437	868
1361B	81.8	2.13	0.2	588	1.63	0.08	5.96	0.0248	0.49	1.35	0.395	9.15	3.27	43.5	18.41	92.7	23.88	259.8	53.5	11220	1.326	14.41	0.37	167.1	912
1361B	79.4	1.93	0.3	491	1.36	0	6.45	0.02	0.61	1.36	0.379	8.13	2.98	37.2	15.52	77.7	19.31	210.8	42	11490	1.106	19.85	0.629	240	1226
1361B	93	3.58	0.29	797	3.33	0.038	29.2	0.024	0.95	1.86	0.9	10.73	3.94	53.5	24.13	127.6	35.2	399	85.8	10850	1.43	16.53	0.85	338.2	1038
1361B	85.2	2.25	0.224	496	1.5	0.05	6.68	0.041	0.6	1.4	0.457	8.42	3.01	38.4	15.35	77.3	19.3	206.6	41.5	11600	1.107	18.74	0.602	231.7	1161
1361B	71.9	2.06	0.2	451	1.48	0.047	6.44	0.02	0.38	0.99	0.32	7.53	2.55	33.5	14.08	71.1	18.14	195.3	39.6	11730	1.053	16.74	0.567	196.3	1057
1361B	400	3.07	3.4	530	1.47	4.2	16	0.97	4.8	2.52	0.5	9.99	3.41	40.7	16.77	81.2	20.33	218.8	43	11430	1.097	18.71	0.731	289	1207
1361B	78.8	2.39	0.19	610	2.15	0	17.43	0.035	0.6	1.57	0.61	9.18	3.38	42.9	18.54	96.4	25.68	288.9	62.6	11710	1.106	21.77	0.98	381	1373
1361B	89.5	11	6.1	1041	3.43	1.37	31.9	0.311	2.54	3.2	1.33	17.5	5.89	73.5	30.8	154.5	40.4	449	95.1	9940	0.937	24.9	3.43	642	1482
1361B	280	2.51	1.3	663	1.7	1.9	10.8	0.53	3	2.32	0.432	11.3	4.1	50.5	21.04	105.2	26.5	284.4	59.1	11120	1.5	18.85	0.592	252.1	1199
1361B	80.6	2.27	0.25	539.6	2.02	0	11.55	0.0247	0.5	1.39	0.547	8.2	3.13	41.4	17.42	87	22.35	234.8	48.4	11370	1.249	17.52	0.669	242	1042
1361B	98	2.37	0.28	741	2.58	0.019	10.05	0.03	0.74	1.86	0.519	11.83	4.33	54.9	23.08	117.7	30.2	320.6	66.4	11100	1.678	20.62	0.672	265	1286
1361B	153	3.77	0.55	891	3.48	0.6	28.4	0.23	1.31	2.58	1.08	13.62	5.35	66	27.92	144.3	38.02	419.7	86.6	10400	1.61	16.28	0.8	326.6	1023
1361B	75.4	1.9	0.14	463	1.59	0.032	7.67	0.014	0.44	1.24	0.403	6.87	2.77	35.6	14.86	73.4	19.43	206.3	41.7	12130	1.18	17.7	0.534	199.1	1131
1361B	95	3.86	0.15	585	1.89	0	27.7	0.053	0.95	1.75	0.799	10.58	3.59	45.8	18.75	91.9	23.37	250.5	50.9	10740	1.049	15.46	1.13	407	986
1361B	65	3	0	620	2.3	3.1	7.7	0.038	0.11	2.3	0.33	15	4.5	57	21	100	27	270	53	13000	1.5	20	0.58	250	1500
1361B	199	3.15	0.31	1800	10.75	0	12.64	0.046	1.34	4.17	0.97	31.1	11.7	144	57.7	269	63.9	625	115	11020	3.8	39.3	1.29	498	2460
1361B	85.9	4.06	0.24	602	2.16	0	28.9	0.051	0.77	2.22	0.839	11.05	3.7	46.9	18.76	93.8	23.73	245.8	50.6	10770	1.129	16.59	1.14	443	1015
1361B	90	2.32	0.225	518	1.72	0	9.94	0.021	0.43	1.19	0.51	8.85	2.91	39.41	16.34	81.1	20.81	224.1	44.9	11840	1.23	19.04	0.633	258.1	1199
1361B	3800	2.71	25	656	2.15	29	66	6.8	35	8.7	1.05	15.7	4.57	53.2	20.3	97.4	24.7	252.5	50.5	11090	1.31	25.9	1.14	442	1683
1361B	154	2.45	0.25	557	1.82	0.082	7.45	0.076	0.95	2.04	0.45	10.52	3.61	44.1	17.72	86.9	21.74	231.5	45.2	11420	1.115	19	0.68	277.5	1240
1361B	116	2.98	0.22	519	1.63	0	17.09	0.023	0.46	1.08	0.557	7.36	2.88	37	15.74	82.8	22.5	251	51.4	11430	0.83	10.23	0.54	197	658
1361B	71.6	2.56	0.16	469	1.75	0	16.54	0.023	0.48	1.23	0.51	7.03	2.61	34.2	14.4	74.2	19.65	217	47.2	11440	0.809	15.55	0.735	298.9	925
1361B	190	2.12	0.24	531	1.39	0.014	6.54	0.04	0.64	1.71	0.362	8.87	3.28	41.8	17.25	84.3	21.4	227.2	44.7	11720	1.131	18.07	0.558	223.8	1165
1361B	86.2	2.06	0.2	608	2.14	0	10.29	0.03	0.52	1.77	0.519	10.59	3.9	48.2	19.89	95.2	23.64	240.2	49.1	11900	1.437	22.45	0.813	336.2	1460
1361B	111	2.78	0.37	716	1.81	0.042	15.5	0.057	1.06	2.24	1	12.9	4.54	54.4	22.5	112.7	28.6	306	63.6	11100	1.03	13.29	0.686	233	801
1361B	95.2	2.04	0.19	540	1.45	0.037	6.09	0.017	0.67	1.52	0.285	8.99	3.39	40.7	16.59	82.5	20.83	221	45.4	11350	1.027	18.59	0.631	231.7	1121
1361B	93.2	1.91	0.29	575	1.53	0.157	6.57	0.065	0.92	1.47	0.415	9.59	3.49	44.6	18	89.7	22.6	239	48.3	11530	1.281	17.42	0.521	208	1095
1361B	350	3.54	2.8	1040	2.38	18.5	25.3	0.74	4.3	4.92	1.51	22.2	7.3	90	35.1	164	40.4	414	80.6	10730	1.23	20.8	3.82	398	1150
1361B	423	1.74	1.1	494.8	1.41	0.77	9.3	0.25	1.33	1.17	0.457	8.47	3	37.6	15.76	78	19.88	208.6	42.55	11780	1.126	17.86	0.531	213.8	1112
1361B	102	2.99	0.27	1017	1.36	0.087	25.5	0.164	2.33	4.78	1.65	22.4	7.14	84.3	32.8	154	37.9	397	77.5	10700	0.8	14.9	1.25	485	910
1361B	75.4	2.95	0.2	685	1.67	0	18.85	0.063	1.04	2.05	0.83	11.85	3.98	50.6	21.24	108.4	27.96	306.3	65.8	10910	0.879	12.42	0.737	273.1	761
1361B	75.6	2.02	0.21	594.2	1.86	0.021	8.91	0.0144	0.49	1.17	0.51	8.7	3.35	42.8	18.59	95.1	25.26	266.1	55.56	11190	1.38	13.57	0.442	172.5	830
1361B	149	4.17	0.32	752	0.49	0	4.8	0.03	0.89	2.49	0.788	16.7	5.72	70.6	26.1	117.2	27	261	50.5	11960	0.268	10.2	0.66	31.5	66
1361B	74.7	1.97	0.32	471	1.51	0	6.92	0.024	0.51	1.47	0.393	8.5	2.92	36.2	14.46	72.5	18.58	199.7	42.5	11940	0.93	19.18	0.632	246.9	1170
1361B	109	2.13	0.19	798	3.21	0.025	19.13	0.036	0.79	2.08	0.759	13.05	4.71	61.6	25.19	123.7	31.67	331.1	66.5	11170	1.796	22.46	1.09	397	1392
1361B	67.3	1.72	0.262	329	0.97	0.022	3.7	0.024	0.266	0.84	0.164	4.97	1.89	25.1	10.41	52.4	13.64	151.9	30.5	12500	0.788	10.93	0.299	111.5	701
1361B	74	3.16	0	860	1.21	0.124	20.4	0.113	1.84	3.4	1.37	18.2	6.1	70	27.9	133	32.1	335	68.7	11130	0.6	12.3	0.89	348	715
1361B	910	2.87	6.1	502	1.82	7.5	30.3	1.36	6	1.86	0.62	7.24	2.66	34.5	15.55	81.7	23.04	268.4	57.7	11670	0.922	11.63	0.66	202.9	764
1361B	87	1.3	0.24	1040	2.09	0	13.6	0.035	1.15	3.13	1.08	19.3	6.8	87	33.1	159	38.9	391	77	12130	1.18	17	0.85	306	1020
831	83.6	2.41	0	549	1.36	0	8.56	0.027	0.6	1.47	0.357	8.71	3.01	39.1	16.14	83.1	21.21	228.7	48.4	11810	1.091	17.06	0.647	253	1052
831	65	3.61	0.22	510	1.55	0	18.21	0.028	0.54	1.37	0.54	7.4	2.61	35.1	15	79.6	20.9	238	53.5	11480	0.781	10.99	0.612	230.7	655
831	84.8	2.33	0	544.9	1.74	0	7.57	0	0.62	1.51	0.409	8.96	3.34	41.1	17.25	83.8	21.29	226.3	46.94	12010	1.152	19.17	0.622	264.3	1187
831	161	3.06	0.22	1040	1.86	0	23.3	0.122	1.87	3.99	1.49	20.1	6.73	83	33.3	158	40.1	422	87	10250	0.989	19	1.41	570	1170
831	240	2.05	1.7	551	1.37	2.7	14.1	0.69	2.9	2	0.48	9.64	3.03	40	16.84	86.8	22.05	238.5	49.7	12270	1.128	18.51	0.64	279.3	1206
831	69.5	2.36	0	517	1.62	0	13.6	0	0.53	1.05	0.514	6.78	2.66	35.4	15.64	81.7	21.81	240.8	53.7	11750	0.912	13.99	0.63	238.2	876
831	1310	1.47	10.4	550	1.42	12	30	3.1	13.2	3.5	0.54	11	3.42	42	16.76	83	20.79	218.8	45.5	11870	1.2	20.7	0.694	265	1255
831	83.1	2.87	0.36	918	1.55	0.076	24.9	0.143	2.09	3.77	1.45	18.3	5.76	69.3	28.3	140.2	36.2	391	82.7	11290	0.806	15.25	1.11	460	956
831	14300	2.57	118	571	1.31	151	322	38.1	160	28.5	2.64	28.4	5.19	49.1	18.39	86.6	21.99	233	48.3	11500	1.142	18.43	1.44	223.1	1057
831	0	3.21	0	1690	1.98	0	22	0	5.4	9.4	2.43	43	13.6	151	54.7	246	55.7	539	104.3	9920	1.01	21.2	1.58	603	1276
831	60.2	2.12	0.21	413.5	1.5	0	10.71	0.018	0.257	0.95	0.409	5.97	2.094	28.38	12.42	66.4	18.11	211.4	46.16	13170	0.993	18.01	0.631	233.7	1123
831	105	5.11	0.7	734	3.13	0.34	24.45	0.122	1.18	2.62	0.833	12.85	4.51	57.5	23.05	113.9	28.95	308.6	63.2	11200	1.549	20.6	1.28	473	1230
831	240	2.23	0.7	589	1.76	0.64	10.1	0.21	1.4	1.51	0.435	10.42	3.59	44.8	18.36	90.6	22.38	235.7	48.4	11740	1.28	24	0.896	366	1486
831	135	4.64	0.377	1045	3.3	0	31.3	0.1	1.47	2.91	1.32	17.62	6.38	80.1	33.1	161.9	39.8	405	82.2	10920	1.284	12.83	0.88	346	756
831	93	1.78	0.29	554	1.56	0.099	7.02	0.069	0.83	1.6	0.401	9.55	3.4	41.9	17.05	85.4	21.23	223.7	46.7	12050	1.217	19.74	0.618	254.1	1217
831	102.9	3.43	0.23	685	2.28	0.022	28.13	0.054	0.89	1.71	0.794	10.97	3.77	49.8	20.88	106.2	27.42	298.5	65	11400	1.23	16.84	1.131	460	1050
831	80.9	2.95	0	579	2.04	0	22.67	0.035	0.71	1.66	0.678	9.85	3.37	43.7	17.89	89.3	23.61	251.5	52.8	11900	1.237	16.11	0.951	376	1011
831	119	3.51	0.29	664	1.79	0	23	0.061	0.98	2.01	0.776	10	3.56	45.1	20	105.6	27.9	315	71.4	10670	0.677	13.8	0.95	346	852
831	156	2.28	0.34	463	1.2	0.13	8.49	0.063	0.63	1.45	0.4	7.87	2.77	34.3	14.1	72.3	18.64	204.8	42.28	11390	0.98	19.54	0.722	273.7	1183
831	0	6.7	0	819	8.35	0	61.5	0	2.46	3.67	1.13	17.6	5.63	63.6	24.2	111	27.5	285	54.7	11630	2.11	54.8	6.2	2580	3450
831	103	2.82	0.35	638	2.13	0.068	8.93	0.066	0.95	2.53	0.614	12.96	4.31	51.2	20.6	97.4	24.8	258	51.1	11540	1.329	18.37	0.713	274	1086
831	120	2.74	0.289	690	2.09	0.044	21.9	0.064	0.84	2.08	0.82	11.1	3.9	49	20.1	100	25.7	284	59	9900	1.01	10.3	0.81	280	610
831	90.4	2.33	0	693	2.25	0	8.29	0.0176	0.51	1.47	0.496	9.91	3.79	49.1	21.03	108	27.7	304	65.3	11020	1.55	16.8	0.525	179	990
831	12160	3.1	100.5	731	1.66	124.9	258	32.6	141.2	29.1	2.69	31.8	6.8	62.9	22.9	107.7	25.9	273	56.6	11940	1.33	23.79	1.49	297	1405
831	0	3.7	0	1430	1.81	23	28.6	0	0	6	2.51	31.2	10.3	119	45.6	214	50.8	500	100	11980	1.09	17.6	1.32	560	1180
831	87.6	2.71	0	1136	1.27	0	20.45	0.113	1.91	4.26	1.743	24.25	7.95	95	37.36	175.4	42.67	440.3	88.6	11850	0.785	19	1.228	482	1179
831	283	4.4	0.53	2010	4.35	0.21	46.3	0.3	4.2	7.9	2.6	41	13.6	158	62	288	68	672	133	10860	1.98	29.5	2.45	1010	1790
831	280	2.3	0.54	481	1.07	0.31	6.22	0.14	0.78	1.55	0.296	8.36	2.88	35.8	14.92	76.2	19.03	201.7	41.5	11630	0.96	18.8	0.551	216.2	1120
831	136.8	3.76	0.33	1201	5.79	0	37.2	0.092	1.71	3.86	1.67	22.2	7.76	96.2	38.6	183.2	45.2	465.7	93.6	11770	2.14	30.8	2.28	859	1920
831	4800	1.1	42	1100	1.1	14	180	18	85	20	2.4	38	8.9	99	36	170	44	410	79	11000	1.2	18	1.2	360	1200
831	91.6	1.77	0	529	1.52	0	8.79	0.034	0.54	1.37	0.421	8.56	3.15	40.3	16.58	83.5	21.61	227.1	47.1	12010	1.173	19.39	0.746	283.6	1206
831	106.4	3.15	0.44	1090	2.58	0.088	20.53	0.126	1.69	3.56	1.365	19.1	6.83	83.2	34.6	168.9	42.8	453	96	11630	1.282	20.89	1.178	435	1315
831	80.7	2.4	0.28	494	1.26	0.046	7.64	0.035	0.517	1.44	0.387	7.83	2.93	36.3	15.08	76.3	19.89	213.6	45.2	11910	1.238	18.35	0.675	248.4	1152
831	439	2.64	2.91	703	2.04	4	18.7	1.12	5.2	2.79	0.719	13.27	4.61	54.4	22.35	109.4	26.97	278.5	56.7	11970	1.56	28.47	1.216	484	1819
831	90.4	2.16	0	509	1.32	0	6.56	0.024	0.53	1.61	0.381	9.23	3.17	39.7	16.25	80.9	20.61	219	44.5	11960	1.145	21.74	0.742	273.7	1330
831	460	2.25	3	541	1.63	3.3	13.6	0.91	4	2.24	0.518	10.34	3.45	42.7	17.19	84.3	21.19	222.9	44.4	11690	1.198	22.25	0.806	304.6	1382
831	2220	2.17	21.3	642	2.32	26.8	76	7.3	30	6.4	1.02	14.8	4.27	47.7	19.55	98.4	24.9	270.5	53.4	12930	1.57	22.16	1.08	369	1544
831	79	2.5	0.18	610	1.6	6	18.73	0.049	0.78	1.7	0.65	9.79	3.39	44.5	19.19	99.3	26.36	298	63.1	11730	0.848	13.93	0.676	307	912
831	350	3.12	0.38	650	1.86	0.28	21.4	0.136	1.07	1.94	0.829	10.09	3.67	47.6	20.22	103.3	27	293	62.5	11220	0.924	11.75	0.691	249.9	703
831	116	2.18	0.321	614	1.66	0.032	6.16	0.033	0.58	1.52	0.332	9.23	3.43	45.1	18.81	96.7	24.75	263.8	56.1	11680	1.344	16.46	0.509	201.4	1020
831	112	2.48	0.47	490	1.29	0.126	6.61	0.063	0.68	1.4	0.444	7.91	2.77	36.4	15.48	76.7	19.16	196.3	41.92	11630	1.16	19.54	0.68	250.4	1200
831	0	8.9	3.7	811	1.89	0	23.1	0	1.66	2.89	1.12	15.8	5.22	63.6	25.6	127.3	31.1	328	69.6	10790	0.942	14.09	1.68	343	787
831	82.5	1.93	0	505	1.28	0	8.3	0	0.5	1.32	0.379	8.11	2.94	37.4	15.8	80	20.44	218.9	46.49	11480	1.127	17.39	0.62	244.5	1079
831	167	1.73	0.58	578	1.43	0.57	7.05	0.138	1.01	1.74	0.354	10.03	3.64	44.9	18.22	90.1	22.79	235.1	48.39	11870	1.274	24.47	0.908	330	1523
831	97	3.37	0.39	1012	1.83	0.233	21.2	0.162	2.23	3.65	1.4	19.5	6.64	77.7	32	156	39.8	433	87	11560	0.96	19.6	1.15	485	1210
831	88.5	2.46	0	505	1.2	0	7	0.03	0.6	1.25	0.365	7.96	2.84	37.2	15.51	78	19.41	208.6	44.8	11820	1.12	18.57	0.612	240.7	1146
831	120	2.86	0.38	740	2.02	0	7.98	0.037	0.67	2.07	0.515	12.26	4.34	55.5	22.8	115.8	29.7	317	66.7	11980	1.3	18.58	0.531	220	1198
831	192	2.36	0.34	500	1.33	0.21	6.03	0.085	0.85	1.62	0.328	9.09	2.82	38.1	15.21	78.8	19.71	205.7	43.66	11890	1.1	20.01	0.56	240.5	1221
831	320	2.6	1	542	1.21	2.9	9.4	0.21	3	2.07	0.399	9.19	3.23	40.8	16.84	82.4	20.96	223.2	46	11350	1.13	22.03	0.92	319	1354
831	85.8	2.22	0.151	493	1.31	0.018	9.06	0.029	0.61	1.34	0.381	8.11	2.817	36.9	15.17	76.3	19.84	209.5	44.24	11550	1.076	19.06	0.725	271.6	1141
831	59	2.9	0.19	419	0.95	0	12.86	0.021	0.46	1.02	0.41	6.04	2.25	30.8	12.96	66.3	17.74	192.1	41.5	11920	0.701	8.15	0.421	145.2	462
831	200	2.51	1.4	582	1.65	1.4	9.1	0.38	1.7	1.9	0.439	10.3	3.47	44.2	18.22	89.9	23.14	246.8	50.5	11510	1.26	18.86	0.689	250	1202
831	136.2	3.39	0.245	969	2.11	0	22.3	0.109	1.91	3.45	1.36	18.6	6.06	75.3	30.1	147.7	37.2	395	82.2	11050	0.962	17.2	1.037	398	1072
831	96.2	2.32	0.21	722	2.07	0	7.05	0.034	0.66	1.63	0.422	10.44	4.03	52	22.4	113.8	29.35	312.4	67.2	11640	1.532	17.63	0.557	222.7	1116
831	86	3.37	0.32	551	1.96	0	19.05	0.045	0.7	1.67	0.596	9.82	3.28	40.6	17.08	85.1	21.29	227	47.86	11980	1.249	16.12	0.88	340.2	992
831	89.8	2.93	0.34	984	1.55	0	21.68	0.104	1.91	3.78	1.55	20.4	6.85	80.4	31.6	151.5	36.9	383	78	11030	0.855	14.77	0.981	401	899
831	80	1.88	0.32	486.2	1.1	0	5.97	0.027	0.52	1.14	0.337	7.17	2.621	35.37	14.72	77.8	20.22	222.5	47.79	11370	1.036	12	0.356	145.7	734
831	78	3.13	0.4	1240	1.37	0.048	23.2	0.164	2.6	4.88	2.12	26.4	8.64	103.5	40.9	193.6	47.6	490	98.5	11470	0.85	16.53	1.19	499	1073
831	92.4	2.48	0	461	1.38	0.021	8.54	0.042	0.52	1.28	0.388	7.32	2.78	33.7	13.86	70.5	18.48	197.9	41.9	12040	1.14	17.54	0.593	241	1076
831	83.3	2.94	0.175	560	2.12	0.101	11.33	0.038	0.61	1.36	0.498	8.65	3.11	42.24	17.55	89.2	22.76	237.9	50.2	11700	1.374	16.78	0.63	239.1	1002
831	278	2.55	1.23	697	1.86	1.6	11.8	0.45	2.13	2.37	0.498	11.35	4.05	54.2	21.7	110.3	27.7	289	60.3	11690	1.463	23.11	0.85	343	1501
1681	213	2.11	1.09	550	1.4	1.32	9.2	0.31	1.72	1.77	0.396	9.6	3.32	42.8	17.37	84.6	21.91	231.9	46.06	11780	1.206	23.52	0.905	315.3	1501
1681	125	3.23	0.28	775	2.17	0	20.71	0.082	1.24	2.47	0.95	13.3	4.67	58.3	24.7	121.9	31.2	338	71.6	11300	1.151	17.82	1.01	373	1082
1681	350	2.44	1.6	502	1.23	2.2	9.5	0.53	2.8	1.98	0.383	9.21	3.06	39.5	15.44	78	19.68	208.1	42	11670	1.1	17.93	0.625	221.5	1131
1681	0	2.99	0	789	3.07	0	17.71	0	0	1.34	0.705	11.45	4.1	55.5	24.1	124.5	32.8	361	75.3	11800	1.54	15.51	0.652	246	962
1681	410	2.41	1.7	575	1.72	1.9	12.1	0.56	2.3	2.17	0.503	10.05	3.57	44.6	18.07	91.7	22.75	239.7	48.3	11550	1.227	20.8	0.804	290.9	1290
1681	550	67	37.5	1400	3.38	6.2	23.1	1.17	6.2	5.68	1.55	28.7	9.74	114.2	44.7	206.6	48.7	484	94.9	8350	1.141	20.46	4.78	500	1024
1681	250	2	1.13	547	1.39	1.5	10.8	0.43	2.3	1.9	0.434	9.33	3.31	43.1	17.14	85.7	21.56	225	44.97	11390	1.126	21.25	0.741	290.6	1300
1681	7300	2.43	55	610	1.74	65	152	17.9	78	14.9	1.87	19.4	4.73	50.5	19.01	94.8	22.97	241	49	12000	1.213	21.31	1.32	293	1300
1681	134	3.91	0.5	992	3.13	0.117	30.9	0.103	1.59	3.39	1.38	17.2	5.78	72.7	30.5	152	39.4	422	87.1	10640	1.26	19.7	1.46	560	1230
1681	87	1.85	0.3	396	1.38	0.173	6.59	0.055	0.44	1.25	0.318	6.77	2.27	29.6	12.12	61.7	15.94	169.8	35.3	11820	0.945	14.71	0.58	195.8	920
1681	83.4	1.85	0.21	483.3	1.37	0	6.96	0.029	0.6	1.2	0.347	7.44	2.83	36.1	14.9	75.3	20.01	210.8	44.34	12010	1.095	19.66	0.596	247.4	1222
1681	136	4.6	0.38	973	3.46	0.079	39.2	0.069	1.03	2.55	1.21	15.3	5.55	71	29.6	150	38.6	413	88.7	10360	1.51	20.8	1.48	611	1270
1681	118	2.6	0.45	550	1.51	0.19	7.84	0.086	0.88	1.55	0.435	9.59	3.44	42.6	17.33	85.4	21.13	219.4	45.1	11530	1.214	23.55	0.93	353	1474
1681	472	2.64	3.9	431.9	1.3	5.5	19.8	1.34	5.7	1.94	0.409	8.09	2.49	32.5	13.3	68.4	17.63	193.3	40.3	11550	1.001	16.86	0.749	249.7	1041
1681	2150	6.69	12.1	1056	3.32	19	71	4	16.5	6.1	1.82	21	7.13	87	33.9	165.6	41	423	85.5	10380	1.582	16.8	2.17	635	950
1681	0	2.31	0	609	1.65	0	7.35	0	0	2.04	0.408	10.54	3.91	47.7	19.17	94.7	23.56	249.2	50.3	11610	1.313	23.4	0.917	350.6	1462
1681	260	2.54	1.32	528	1.32	2.1	12.2	0.52	2.7	1.57	0.4	8.48	3.05	39.1	16.44	84.9	22.37	240.1	52.2	11320	1.123	15.69	0.582	219.1	981
1681	72	2.45	0.255	402.4	1.18	0	6.58	0.0177	0.46	1.15	0.325	6.12	2.31	30.3	12.13	63.2	16.61	181.4	38.11	11870	0.995	15.55	0.459	176.8	929
1681	108	3.8	0.42	795	1.82	0.11	20.8	0.124	1.91	2.55	1.2	15	5.19	63.9	24.8	123	30	314	67.8	11030	0.815	13.95	1.13	376	831
1681	92.1	2.58	0.281	547	1.31	0	8.8	0.025	0.71	1.46	0.348	8.68	3.38	41.3	16.92	85.8	21.59	229.2	46.98	12180	1.26	20.34	0.768	297.1	1333
1681	86.3	2.19	0	534	1.32	0	7.22	0.039	0.74	1.62	0.389	9.26	3.26	40.08	16.2	81.9	21.11	224.6	46.3	11230	1.051	19.52	0.734	270.9	1208
1681	97	2.73	0.44	752	2.27	0.069	20.4	0.051	0.73	1.82	0.87	10	3.81	49.6	22.3	118.2	31.3	349	80.2	11280	0.93	18.9	1.05	384	1128
1681	1090	2.27	8.3	479	1.14	10.7	30	2.6	11	2.97	0.53	9.35	2.8	35	15.01	73.9	19.3	208.5	41.74	11320	0.959	18.07	0.7	274.1	1162
1681	0	2.36	0	540	1.61	0	9.95	0	0	1.54	0.393	8.22	3.23	40.4	16.67	82.3	21.52	232.4	48.12	11700	1.278	20.49	0.745	281	1266
1681	3300	3.12	27	572	1.65	37	82	9.1	38	8.1	1.01	14.2	3.85	45.6	18.44	88.2	23.21	244.3	48.6	12540	1.44	24.28	1.04	332	1574
1681	0	33	11.1	1237	4.86	0	41.6	0	3.66	6.05	2.08	31.7	9.9	113.6	42.6	189.5	44.4	424	80	9620	1.97	32	5.65	1538	1987
1681	94.9	0	0.272	566	1.47	0.052	8.34	0.055	0.65	1.85	0.475	9.46	3.57	43	17.75	86.6	21.79	232.9	46.9	11790	1.246	23.25	0.818	328.3	1432
1681	99.7	3.88	0	971	2.26	0.017	28.7	0.116	1.8	3.33	1.48	17.09	5.94	73.3	29.87	149.2	37.92	422	89.5	11170	1.106	21.42	1.3	533	1339
1681	85.3	3.58	0.26	489	1.72	0	23	0.029	0.61	1.37	0.636	8.14	2.94	35.7	15.42	74.4	19.15	209	44.1	11180	0.869	14.82	0.862	356	928
1681	870	2.24	3.4	515	1.28	5.3	17	1.5	6.8	2.7	0.49	9.56	3.33	39.7	16.2	80	19.76	207.3	42.5	11590	1.12	18.1	0.71	274	1130
1681	1150	1.84	7	641	1.92	8.1	26.6	2.4	11.8	4.1	0.97	12.7	4.14	50.9	20.82	100.2	23.7	250	51	11560	1.41	24.58	1.02	338	1436
1681	111	3.19	0.39	920	1.64	0.089	22.1	0.152	2.47	3.8	1.58	20.2	6.6	76	29.4	142	35.5	380	82.8	12510	0.813	18.9	1.16	416	1138
1681	2100	3.42	17.7	642	1.94	20.9	54	5.5	22.9	6.2	0.92	14.1	4.33	51.7	20.4	98.3	24.52	253.4	50.8	11130	1.307	20.59	0.99	333	1294
1681	1080	1.19	3	424	1.3	4.6	15.1	1.15	4.9	2.03	0.27	6.91	2.7	32.9	13.52	67.1	16.65	184	37.4	11540	0.91	18.37	0.636	229	1081
1681	440	2.66	0.94	548	1.54	0.68	7.8	0.23	1.15	1.6	0.454	9.13	3.31	41.1	16.99	86	22.49	240.6	49.7	11650	1.287	16.7	0.502	181.5	1033
1681	88.6	2.79	0.35	549	1.41	0.076	8.81	0.067	0.94	1.49	0.452	9.83	3.44	43	17.12	85.4	21.5	226.2	47.1	11340	1.237	21.58	0.863	331	1317
1681	74.3	2.89	0.22	447	1.66	0	17.02	0.035	0.391	1.19	0.471	6.79	2.59	33.6	13.85	71.1	18.57	201.8	42.3	11640	1.008	15.56	0.834	309	954
1681	93	2.78	0.24	878	3.29	0	9.15	0.029	0.51	1.53	0.599	10.96	4.77	63.3	27.21	140.4	36.7	401	85.1	12180	1.625	36.6	0.92	330	2400
1681	171	1.95	0.24	545	1.37	0.13	9.4	0.067	0.94	1.41	0.392	8.21	3.05	38.6	16.32	83.7	22.69	247	51.6	11900	1.28	18.19	0.799	251.2	1194
1681	84.9	2.64	0	560	1.43	0	8	0	0.67	1.52	0.421	9.84	3.32	42.3	17.38	87.2	22.26	235.3	48.97	11430	1.179	18.68	0.784	286.4	1170
1681	90.8	2.83	0.35	819	3.35	0	17.18	0.034	0.72	1.76	0.68	11.77	4.1	58.1	25.39	132.6	35.1	388	83.9	11250	1.67	17.82	1.185	269.6	1135
1681	270	2.91	1.8	531	1.56	2	14	0.34	2.6	1.87	0.534	9.31	3.29	40.9	16.58	83.5	21.23	227.1	47.27	11300	1.131	20.42	0.92	378	1302
1681	0	1.76	0	564	1.64	0	7.11	0	0	1.23	0.399	8.42	3.14	41.1	17.51	88.3	23.16	250	53.2	12000	1.423	21.06	0.647	249.1	1317
1681	97	3.28	0	561	1.55	10.1	7.63	0.043	0.77	1.95	0.382	10.12	3.84	45.3	17.7	89.2	22.9	244	47.2	11980	1.29	23.64	0.75	359	1601
1681	220	2.02	1	529	1.95	11.9	9.8	0.35	2	1.56	0.36	8.01	3.12	39.8	15.8	82.7	21.4	235	46.4	12360	2.03	14.97	0.452	180.2	1034
1681	151	2.44	0.75	708	2.22	0.67	9.53	0.182	1.66	2.04	0.532	12.15	4.14	53.7	21.69	109.5	27.4	296	60.7	11430	1.52	19.79	0.665	268	1263
1681	290	2.56	1.8	1193	1.49	1.5	12.8	0.42	3.8	5.05	1.46	26.1	8.52	100.4	38.3	181.4	43.4	443	87.3	11250	0.901	19.25	0.88	336	1245
1681	82.8	1.97	0.37	648	1.78	0	5.42	0.028	0.69	1.46	0.424	10.05	3.54	47.9	19.9	102.2	26.77	291.4	61.7	11470	1.495	16.6	0.459	178.5	1014
1681	337	2.42	0.78	431.1	1.32	1.04	10.08	0.236	1.28	1.28	0.427	7.45	2.45	32.5	13.62	71	18.3	203.1	41.06	11820	0.932	16.32	0.62	222.3	1033
1681	86.2	2.41	0.2	518	1.36	0	6.53	0.0285	0.515	1.36	0.321	9.06	3.14	40.2	16.21	81.4	20.02	215.7	43.8	11700	1.107	20.27	0.638	268.6	1280
1681	97	74	0.172	549	1.58	0	9.17	0.039	0.71	1.86	0.488	9.69	3.38	43.1	17.15	86.9	21.88	235.5	47.6	11320	1.158	21.41	0.898	357	1354
1681	80.6	3.79	0.21	730	2.87	0.025	34.74	0.054	0.83	1.91	0.814	11.46	4.05	52.7	22.25	113.3	29.85	324.9	67.9	10920	1.175	16.91	1.19	503	1087
1681	210	2.23	1.3	593	2.22	0.46	18.5	0.34	2	1.64	0.686	9.87	3.58	46.4	18.63	92.7	23.75	251.5	50.94	11520	1.382	21.49	1.12	413	1322
1681	1736	4.09	1.46	5500	9.28	1.8	16.7	0.61	4.5	9.41	0.75	75.2	31.6	430	175.9	804	176.6	1628	294	12540	4.33	333	18.4	994	2710
1681	1080	2.9	7.5	453	1.37	10.8	27	2.5	11.9	3.3	0.67	9.4	2.81	34.8	14.08	72.2	18.4	207.9	41.6	11950	1.12	18.36	0.81	267	1225
1681	344	6.63	0.55	2250	3.37	0.13	24.2	0.215	4.3	9.1	2.82	49.4	16.1	187	70.3	311	73.2	706	132	10480	1.49	21.76	1.51	540	1344
1681	69.5	2.13	0.32	444	1.08	0.019	5.52	0.0169	0.42	0.97	0.242	6.61	2.46	31.9	13.38	70.9	17.96	198.1	41.5	11650	0.927	11.99	0.512	137.3	722
1681	121	2.84	0.37	715	2.77	0.19	20.15	0.081	0.99	2.23	0.815	12.07	4.21	53.5	22.47	110	27.35	288.6	59.9	11340	1.39	23.46	1.3	487	1464
723	73.6	2.09	0	514	1.41	0	5.55	0.023	0.509	1.29	0.294	7.73	2.9	36.66	15.42	79	20.66	222.5	46.14	12010	1.301	14.32	0.406	165.9	897
723	54.8	1.66	0.33	662	2.99	0	6.2	0.018	0.266	0.92	0.355	8.42	3.28	46.1	20.2	107.5	29	330	72.2	13680	1.818	23.09	0.408	154	1474
723	87.9	2.39	0.27	1421	1.82	0	15.4	0.105	2.28	5.3	1.82	30.2	10.32	125.5	47.8	224	52.8	535	103.1	11840	1.21	23.2	1.27	445	1475
723	134	1.64	0.24	553	1.42	0	4.59	0.0157	0.368	1.28	0.245	7.72	2.86	40.2	16.97	87.2	23.09	244.8	51.7	11610	1.102	17.06	0.395	162.1	1093
723	127.2	1.77	0.22	526	1.52	0	5.37	0.0189	0.36	1.04	0.334	7.11	2.73	38.5	16.43	85.2	22.1	243.6	51.6	11900	1.16	14.64	0.368	139.7	923
723	62.5	2.33	0.25	703	1.15	0	17.7	0.055	1.17	2.43	1	13.5	4.62	57.7	22.8	112	28.3	299	61.5	12110	0.74	11.26	0.74	283	685
723	58.9	1.58	0.167	450.7	1.4	0	6.06	0.0134	0.317	0.99	0.34	6.63	2.4	32.69	13.86	71	18.64	206	43.95	12440	1.147	17.66	0.534	191.1	1128
723	640	1.74	4.4	1226	1.44	3.5	27.2	1.3	7.7	5.8	2.01	26.4	8.71	102.9	39.8	190	45.7	471	94.9	11520	0.934	20.11	1.27	467	1258
723	3800	1.9	27.5	556	1.55	51	121	14.2	62	12.8	1.4	17.4	4.14	46.3	17.38	83.2	21.25	226.2	45.4	12060	1.264	21.2	1.17	301.9	1370
723	77.4	2.5	0	800	1.56	0	18.6	0	1.41	2.84	1.09	15.4	5.08	63	25	124	31.5	340	70.5	11560	0.84	14.5	0.87	334	900
723	840	2.3	4.1	504	1.54	9	27	2.6	12	3.7	0.58	10	3.33	39.3	16.1	78.8	20.64	224	44.5	11990	1.292	17.22	0.64	231.2	1159
723	370	2.18	1.4	500	1.29	2.1	10.2	0.49	2.3	1.93	0.341	7.94	2.89	37.65	14.98	77.1	20.09	219.4	45.2	11300	1.08	18.15	0.629	232	1143
723	103	2.03	0.3	850	4.32	0.032	15.44	0.048	0.58	1.33	0.564	10.97	4.38	60.2	25.5	136.9	36.5	417	95.1	12210	1.51	24.1	0.662	268.8	1564
723	96	3.31	0.51	1072	1.65	0.025	23.2	0.17	2.71	4.85	1.7	23.9	7.36	89.9	34.2	162	39.9	421	80.8	10840	1.02	14.57	1.1	445	976
723	105	2.26	0.54	2740	9.3	0	20.3	0.042	0.96	4.08	1.59	40.1	15.7	196	76.3	362	91	960	203	13160	2.34	79.2	2.53	1120	5000
723	1060	2.42	8.6	614	1.51	11.4	30	2.6	11.3	3.36	0.472	11.26	3.78	47.5	19.23	96.5	24.29	256	52.4	11480	1.373	21.82	0.687	278.2	1364
723	66.1	2.32	0.24	1175	1.43	0	20.71	0.148	2.22	4.19	1.82	21.35	7.03	87.2	35	179	45.5	508	110.3	11150	0.645	21.23	1.42	539	1333
723	69.6	1.98	0.22	558	1.63	0	6.16	0	0.47	0.98	0.394	8.24	3.1	41.8	17.42	90.6	24.02	271.1	55.8	12210	1.462	15.29	0.384	161.3	995
723	92	2.17	0.29	534	1.25	0.21	7.3	0.09	0.73	1.53	0.37	8.26	2.999	39.4	16.44	85.8	22.77	252.1	53.3	11200	1.283	14.58	0.461	174.1	908
723	0	2.95	0	880	1.43	0	19.1	0	0	3.58	1.41	18.6	6.05	72	28.2	139	34.3	367	72.3	11610	0.854	13.6	0.81	365	880
723	72.2	1.87	0	513	1.3	0.008	6.51	0.0169	0.38	1.08	0.306	7.68	2.81	37.3	15.58	81.5	21.01	233	49.1	11870	1.247	12.68	0.439	159.1	798
723	92.2	2.72	0.188	970	2.41	0	13.37	0.066	1.27	3.23	1.04	17.3	5.9	75.6	30.4	154.1	38.5	406	83.3	11360	1.66	20.3	0.776	314	1280
723	3900	2.13	32	607	1.76	45	100	11.5	48	9.9	1.17	15	4.12	47.3	18.7	97.5	25.43	278.2	57.5	11700	1.44	16.01	0.78	197.1	960
723	83.3	3.41	0.35	638	1.49	0.068	17.5	0.078	1.04	2.27	0.86	11.8	3.81	48.9	20.1	99.4	25.7	281	57	11460	0.844	12.65	0.706	278	774
723	84.1	2.31	0.208	606	1.83	0	8	0.0234	0.48	1.48	0.389	9.7	3.31	45.8	18.86	95.3	25.24	273.8	57.4	11560	1.415	15.66	0.465	196	976
723	84	3.54	0.287	1244	1.55	0	26.8	0.17	3.1	5.64	2	27	8.93	104.4	39.9	193	46.5	459	92.8	11140	0.895	20.1	1.7	640	1190
723	84.9	2.66	0.27	844	4.6	0	22.1	0.051	0.78	2.43	0.81	13.8	4.98	65.2	27	136	35.1	391	79.5	11860	1.69	25.9	1.37	553	1710
723	660	2.03	5.1	548	1.51	7.8	21.4	1.91	8.8	2.74	0.381	9.8	3.27	41.4	16.46	86	21.71	237.5	49	11960	1.295	14.21	0.439	162.9	879
723	52.1	1.86	0	442	1.8	0	14.38	0.0239	0.328	1.05	0.483	6.13	2.14	28.47	13.03	70.7	19.08	230.6	54	11900	0.585	18.72	0.753	313.1	1199
723	12200	3.2	98	527	1.53	136	290	35	146	26	2.5	26.5	5.1	48.2	17	79.2	20.27	214.2	42.85	12170	1.19	18.66	1.47	231.6	1203
723	69.3	2.1	0.17	432	1.23	0	5.39	0.0268	0.384	1.22	0.222	7.53	2.66	33	13.55	67.7	17.66	190.7	38.9	11740	1.1	14.35	0.443	168.5	921
723	70.9	2	0.22	536	1.4	0	4.96	0.0151	0.39	1.24	0.29	7.41	2.94	38.3	16.22	86.2	22.73	249.1	53	11900	1.287	14.32	0.374	150	915
723	68.7	2.37	0	698	2.59	0	20.95	0.0215	0.6	1.35	0.681	8.59	3.1	42.9	19.76	108.4	31.17	371.8	86.3	11220	0.995	17.46	0.798	322.1	1103
723	85.5	2.35	0.24	451	1.28	0.02	6.19	0.022	0.52	1.1	0.302	7.34	2.61	33.9	14.05	71	17.82	191.4	39.53	11410	1.003	16.55	0.554	211.5	1052
723	420	2.42	2.6	1040	3.55	3.5	26.6	1.03	5.7	3.97	1.2	18.2	6.55	81.7	34	163.5	40.5	430	85.7	11680	1.83	21.8	1.1	427	1320
723	920	2.22	7.5	485	1.71	7.5	23.9	2.12	9.8	3.23	0.504	9.8	3.03	37.9	15.03	76	19.42	213.3	42.7	12090	1.12	17.8	0.638	249.3	1179
723	144	3.82	0.36	785	2.35	0	26.9	0	1.27	2.11	0.93	13.1	4.53	58.5	24.5	124.4	32	339	71.1	10830	1.17	15.6	0.99	368	948
723	148	2.18	0.89	640	1.93	0.81	7	0.239	1.25	1.57	0.424	9.75	3.39	45.8	19.67	101.2	26.71	291.7	61.4	12050	1.69	18.46	0.488	172.2	1144
723	900	2.12	4.3	650	2.31	4.6	23.6	1.17	5.2	2.59	0.64	11.3	3.92	50.7	20.21	99.6	25.07	265.3	52.7	11750	1.42	23.15	1.19	405	1489
723	1130	1.45	7.7	1032	0.87	13	35	3.6	16	7.3	1.31	25.2	7.58	88.7	33.5	160	39.5	407	78.3	11440	0.814	21.2	1.07	381	1349
723	93.8	3.66	0.28	765	3.42	0	23.4	0.056	0.92	2.09	0.93	12.7	4.66	57.4	24	120	30.6	331	68.5	11060	1.39	18.9	1.05	424	1188
723	63.7	1.99	0.19	457	1.09	0	4.19	0.033	0.45	1.48	0.298	7.51	2.65	34.6	14.25	71	18.58	204	40.65	11660	1.045	11.13	0.315	119.7	685
723	47.7	17.1	15.4	161.3	0.93	0.82	3.7	0.14	0.55	0.39	0.108	2.07	0.737	10.87	4.88	26.7	7.32	82.1	17.87	11950	0.687	9.54	2.86	47.3	394
723	49.8	0	0	561	1.71	0	6.77	0	0	1.07	0.575	7.1	2.77	37.8	16.92	89.6	24.7	285	62.5	12860	1.164	15.99	0.378	163	1028
723	80.9	2.19	0.25	428	1.11	0	7.48	0.0194	0.45	1.12	0.312	7.2	2.46	31.9	13.03	67.2	17.28	192.4	39.76	11810	0.949	17.99	0.543	234.8	1112
723	74	2.49	0.39	636	2.38	0.036	16.78	0.03	0.51	1.24	0.586	7.49	2.87	39.02	18.06	99.5	27.59	332	76.7	11030	0.904	16.18	0.654	274.4	1025
723	96.1	1.82	0.237	1035	2.13	0	11.09	0.08	1.67	3.52	1.03	20.6	6.85	83	34.1	160.5	40	417	82.8	11420	1.42	20.56	0.82	333	1347
723	126	2.14	0.52	548	1.48	0.27	8.13	0.127	0.94	1.25	0.446	8.27	3.16	38.7	16.8	87.1	22.76	248.8	53	11390	1.208	13.69	0.468	183.4	863
723	89.1	1.45	0.338	1334	1.48	0.03	17.2	0.116	2.32	5.42	2.02	28.2	9.18	112.4	43.3	204.1	49.5	503	101	11080	0.957	22.14	1.36	495	1366
723	85.5	2.12	0.31	559	1.5	0	6.07	0.0279	0.48	1.31	0.353	9.37	3.31	42.5	17.65	90.6	22.69	246.5	50.3	11180	1.227	17.09	0.593	217.5	1114
723	106.5	2.83	0.22	621	1.7	0	13.53	0.063	1.09	1.82	0.559	11.15	4.03	48.7	19.4	96.9	24.24	253.1	52	11200	1.28	27.74	1.47	612	1738
723	143	5.34	0.73	1220	4.82	0.053	47.7	0.109	2.17	4.05	1.55	23.1	7.92	99	38.9	187.8	45.5	476	95.7	10490	2.07	29.7	2.59	1010	1840
723	77.8	1.56	0	505	1.49	0	7.09	0	0.51	1.36	0.356	7.73	3.01	37.9	15.59	77.7	20.22	215.9	42.9	12040	1.216	18.79	0.672	238.5	1212
723	0	2.9	0	1084	1.97	0	27.7	0	2.19	4.22	1.72	21.1	7.13	83.3	33.4	164.7	41.3	446	92	10840	0.962	20.22	1.63	605	1268
723	82.2	3.26	0	513	2.1	0	20.9	0.031	0.64	1.34	0.61	7.7	2.93	37.3	15.4	79	21.2	239	49.2	11450	1.1	13.11	0.75	253	752
723	260	2.53	1.9	522	1.58	3.3	15.3	0.59	2.9	1.97	0.424	9.31	3.18	39.7	15.75	80	20.46	220.5	45	12050	1.13	19.76	0.773	303	1288
723	57.5	2.04	0.188	500	1.21	0	5.12	0.0204	0.36	0.98	0.298	6.86	2.78	37	15.49	78.9	20.7	233	46.9	12250	1.23	13.51	0.35	148.5	851
723	79	2.01	0.3	924	1.24	0.075	9.78	0.09	1.27	3.61	1.03	18.9	6.18	76.6	29.7	142.6	34.6	359	69.4	11950	0.83	17.28	0.81	305	1109
723	73.3	2.95	0.29	614	2.37	0	15.21	0.032	0.62	1.48	0.59	9.79	3.6	46.8	19.09	95.5	24.76	271.6	55.3	11990	1.34	20.14	0.96	364	1297
723	380	3.34	1.63	1056	7.02	2.2	25.7	0.67	4.4	4.33	0.85	22.3	7.37	89.4	34.6	163	41.8	440	81.6	12360	3.41	54.3	3.49	1459	3570
723	107	2.31	0	536	1.55	0.21	8.58	0.081	0.87	1.87	0.493	8.19	3.25	40.2	16.66	83.1	21.19	225	45	11960	1.21	20.37	0.62	270.6	1345
723	224	2.14	0.59	476	1.19	10	8.86	0	0.68	1.73	0.309	8.18	2.87	36.1	14.7	75.4	19.87	219.4	42.9	11760	1.22	17.72	0.7	272.8	1172
723	0	2.29	0	732	2.48	0	11.21	0	0	1.97	0.551	11.67	4.35	54.7	22.95	117.8	30.59	327.7	67.1	11160	1.676	20.86	0.796	276.2	1309
723	57	2.27	0.381	1051	1.65	0.036	11.67	0.032	1.12	2.88	1.34	17.5	6.24	77.7	31.7	159	40.9	451	94	12620	0.8	21.7	0.917	373	1360
727	87	1.71	0.171	487	1.55	0.0055	7.82	0.0211	0.52	1.26	0.353	7.59	2.86	35.3	14.43	74.3	17.76	191.8	43.6	10310	1.059	21.2	0.815	327.5	1250
727	85	2.82	0.206	820	1.61	0.06	20.7	0.093	1.72	3.41	1.17	15.2	4.99	60.1	24.6	119.5	28.8	304	69.5	9540	0.822	12.12	0.842	321	669
727	138	1.4	0.49	344	0.97	0.28	6.75	0.144	0.73	0.96	0.21	5.25	1.939	24.1	10.32	54	13.39	143.4	33.3	10270	0.777	14.44	0.464	172.2	826
727	242	2.22	1.51	973	1.13	1.56	14.8	0.49	3.14	4.37	1.21	20.39	6.89	79.4	30.98	146.6	33.95	342.4	74.3	10030	0.74	17.49	0.841	328	1011
727	230	2.22	1.6	454.8	1.23	1.6	10	0.51	2.1	1.74	0.365	7.78	2.66	34.21	13.92	69.9	17.04	185.3	41.39	10160	0.904	17.71	0.641	244	1028
727	170	2.55	0.36	1009	2.34	0.123	12.71	0.084	1.41	2.87	0.952	17.8	6.23	78	31.4	156.6	36.6	375	82.1	9580	1.042	16.54	0.844	314	947
727	61.1	1.51	0.216	382	1.25	0.031	5.83	0.0258	0.372	1.04	0.212	5.98	2.24	27.6	11.67	59.9	14.6	156.5	35.4	10330	0.835	13.28	0.443	172	755
727	53	5.6	0.85	298	1.21	0.096	14.3	0.038	0.41	0.85	0.33	4.5	1.64	21.1	8.81	46	11.51	125.7	29.4	9690	0.604	9.43	1.06	181.9	476
727	64	2	0.305	435	1.26	0.024	5.86	0.029	0.489	1.2	0.302	7.11	2.67	32.8	13.42	66.9	16.38	171.6	39.2	10080	0.962	16.86	0.529	212.2	971
727	80	1.64	0.263	576	1.69	0	7.05	0.037	0.58	1.34	0.355	8.19	3.19	40.7	17.13	89.8	22.63	246.3	58.5	9950	1.291	15.62	0.523	199.2	904
727	57.9	2.53	0.37	379	1.28	0.098	6.51	0.053	0.43	0.9	0.27	6.09	2.13	27.42	11.44	58.5	14.79	159.3	36.9	10600	0.872	14.44	0.579	196.8	834
727	89	1.75	0.42	439.8	1.2	0.33	7.66	0.089	0.7	1.38	0.333	7.35	2.47	31.4	13.19	67.5	16.83	178.1	39.92	10330	0.988	17.74	0.626	261.2	1039
727	104	3.45	0.37	658	2.21	0.111	21.6	0.067	1.03	1.86	0.719	11.2	3.85	47.8	20.24	101.8	24.89	268.2	61.7	9580	1.057	13.68	0.897	327	783
727	67	2.32	0.133	493.8	1.84	0	14	0.0229	0.444	1.33	0.55	8.09	2.79	37.39	15.33	78	19.03	202	46.08	10380	0.995	18.03	0.827	330.1	1034
727	248	3.56	1.34	863	2.13	0.88	18.7	0.31	2.59	3.29	1.07	16.5	5.67	67.3	27	131.5	30.9	325	73.1	8970	1.081	16.44	1.14	408	942
727	77	1.82	0.246	553	1.77	0	7.56	0.0273	0.56	1.41	0.47	8.89	3.29	40.9	16.81	87.2	20.68	220.9	50.6	10000	1.077	16.71	0.618	221.5	941
727	103	2.89	0.39	835	2.96	0.073	23.7	0.08	1.12	2.57	1.037	14.12	4.98	61	25.12	127.9	31.01	331.8	76.9	9810	1.25	18.2	1.03	406	1032
727	900	2.2	5.7	402	1.18	8.2	23.3	2.08	8.6	2.54	0.378	7.56	2.43	28.9	12.29	63.3	15.29	166	37.97	10190	0.856	14.24	0.596	195.8	816
727	2400	1.61	18.2	437.2	1.06	30	74	8.7	36	7.7	0.92	10.8	2.9	33.5	13.6	68.2	16.93	180.6	42.1	10180	0.912	13.81	0.569	151.5	756
727	89	2.57	0.28	570	2.22	0.023	16.1	0.023	0.5	1.16	0.59	8.03	2.94	39.8	17.28	91.2	23.04	251.4	60.4	9970	1.069	12.22	0.542	208	682
727	1490	5.64	9.4	542	1.45	17	44	3.3	14.4	3.98	0.62	10.35	3.5	41.8	17.02	83.3	18.97	197.2	43.8	9600	0.807	9.88	0.679	213.2	514
727	64	1.49	0.213	423	1.19	0	6.64	0.0176	0.374	1.08	0.314	6.58	2.43	30.4	12.85	66.2	16.24	176	40.7	10370	0.962	15.61	0.491	198.6	893
727	540	2.14	4.3	408	0.96	5.6	19.1	1.27	6.7	2.29	0.425	7.05	2.39	30.06	12.51	62.9	15.3	165.4	37.73	10040	0.826	15.53	0.681	244	897
727	73	3.55	0.43	779	2.03	0.059	29.1	0.111	1.5	2.47	1.16	13.57	4.52	55	23.27	118.6	29.7	331	79.2	9410	0.81	20	1.56	571	1107
727	1210	1.66	10.6	424	1.24	10	29	3	12.8	3.4	0.6	8.3	2.57	31.2	13.16	65.9	16.11	173.9	39.2	10500	0.927	18.39	0.596	212	1050
727	234	1.46	1.3	381	1.33	1.49	8.5	0.39	2.1	1.02	0.321	5.37	2.01	25.93	11.21	61.2	15.65	171.4	40.7	11290	0.965	17.44	0.459	164.5	1011
727	95	2.86	0.253	1050	1.38	0.0059	25.5	0.146	2.51	4.99	1.88	23.1	7.43	85.5	33.9	157	35.4	363	78.9	9470	0.765	13.55	1.18	451	775
727	126	1.96	0.55	600	2.39	0.38	16.27	0.114	0.95	1.35	0.424	8.8	3.1	40.2	17.51	92.9	23.76	264.5	64.3	10510	1.097	31.2	1.68	574	1667
727	120	2.54	0.236	838	2.08	0.089	19.93	0.097	1.32	2.82	1.261	15.4	5.24	63.5	25.9	128	31.1	333	75.5	10080	0.949	14.53	0.935	359	801
727	5500	1.75	40	371	1.16	60	147	18.3	80	16	1.95	16.9	3.21	30	11.33	56.6	14.03	154.3	36.1	10620	0.838	12.99	0.77	137.3	715
727	83	1.98	0.312	573	2.08	0.014	11.27	0.031	0.63	1.65	0.517	9.3	3.64	42.4	17.91	88.4	21.01	220.8	49.5	10450	1.208	20.69	0.864	341	1195
727	173	3.36	0.363	1074	2.22	0.079	19.5	0.153	2.37	4.33	1.48	22.1	7.24	85.9	33.5	162.3	37.84	385.5	85.9	9490	1.01	17.6	1.13	446	1013
727	79	1.64	0.246	464	1.3	0	6.01	0.0238	0.544	1.51	0.377	7.76	2.8	34.5	14.2	70.9	16.71	179.3	40.66	10250	0.941	19.52	0.728	257	1101
727	82	1.4	0.254	442	1.27	0	6.98	0.025	0.61	1.49	0.317	7.37	2.54	33.2	13.86	69.1	16.6	174.9	39.4	10300	0.93	18.22	0.688	250.6	1043
727	75.8	1.97	0.24	603.1	1.8	0	6.6	0.0164	0.5	1.46	0.418	8.95	3.42	42.6	18.5	95.6	23.66	257	59.78	9980	1.356	16.06	0.52	184.7	909
727	5600	2.04	43.1	479	1.33	53	123	14.6	63	13	1.44	15.9	3.63	38.7	14.84	73.1	17.22	178.5	40.3	10160	0.879	19.41	0.933	235.9	1068
727	70	2.19	0.206	471	1.95	0	12.74	0.031	0.472	1.25	0.516	7.23	2.75	33.84	14.16	73	17.73	191.2	43.29	10280	1.06	15.83	0.698	277.8	916
727	224	1.79	0.67	441.2	1.05	0.68	6.39	0.23	1.36	1.47	0.311	7.16	2.52	31.48	13.3	69.3	17.05	182.3	42.32	9940	0.882	15.23	0.653	181	852
727	65	2.12	0.204	360	1.09	0	6.69	0.028	0.388	1.04	0.301	5.65	2.007	25.57	10.77	56.1	13.81	150.3	34.88	10410	0.808	14.13	0.474	187.3	817
727	125	2.34	0.4	919	3.59	0.133	16.9	0.068	1.01	2.31	0.803	14.8	5.39	69.3	28.1	142.1	33.9	358	78.7	10310	1.816	21.62	0.988	358	1211
727	43.3	1.53	0.244	376	1.24	0	4.8	0.014	0.356	0.84	0.227	5.36	1.97	26.31	11.17	59.9	14.8	162.8	37.19	10920	0.952	17.19	0.43	159.7	986
727	61	2.57	0.207	472	2.02	0	17.26	0.031	0.56	1.27	0.516	7.73	2.78	34.5	14.36	73	17.69	190.7	44.2	10410	1.008	15.32	0.99	333	858
727	1160	1.64	7.1	360	1.14	11.7	31.8	2.92	12.3	3.01	0.52	6.55	2.05	25.8	10.73	55.7	13.94	151.5	35.82	10490	0.838	15.23	0.562	185.9	865
727	81	1.89	0.219	491	1.43	0	7.46	0.022	0.56	1.3	0.427	7.46	2.86	36.4	14.99	74.9	18.28	193.1	43.7	10300	1.071	17.63	0.566	231.9	1013
727	72	1.69	0.199	504	1.39	0	5.82	0.026	0.521	1.21	0.323	7.99	3.02	37.5	15.72	77.6	18.59	198.1	45.1	10500	1.084	18.82	0.546	214	1090
727	7500	2.25	64	438	1.09	76	161	18.1	74	12.6	1.29	15.9	3.38	35.7	13.7	66.9	15.81	168.6	38.3	10250	0.817	16.36	1.06	195	908
727	4300	4.18	50	998	4.48	64	162	14.2	60	13.3	2.51	24.8	7.16	81.5	31.6	150.9	35.4	367	81.5	9880	1.89	30.32	2.57	897	1718
727	129	1.55	0.53	427	0.93	0.45	7.27	0.17	0.95	1.33	0.345	6.9	2.51	31.15	12.96	66.6	16.04	171.7	39.22	10320	0.868	17.36	0.555	228.2	992
727	285	3.02	0.39	1070	4.08	0	10.15	0.058	1.09	2.77	0.688	18.3	6.95	89.5	32.4	146.2	32.03	312.8	64.9	9840	1.264	51	0.756	232	1000
727	58.5	1.98	0.19	376	1.16	0	5.51	0.0108	0.35	0.95	0.254	5.78	2.062	26.88	11.24	58.9	14.62	160.4	37.8	10630	0.922	15.07	0.391	164.8	861
727	79	3.13	0.19	592	2.41	0	25.6	0.0323	0.75	1.43	0.709	8.96	3.17	40.7	17.57	89.7	22.72	249.1	59.3	9830	1.021	18	1.32	524	1028
727	74	2.07	0.225	401	1.14	0	4.27	0.0124	0.293	0.94	0.24	6.54	2.34	29.7	11.91	60.7	14.99	159.3	35.9	10460	0.878	15.82	0.43	177.8	893
727	620	1.69	3.4	509	1.57	4.3	16.9	1.18	5.5	2.29	0.492	8.55	2.96	37.1	15.24	78.3	18.56	199.6	44.7	10240	1.135	18.2	0.631	238.9	1037
727	380	1.6	3.1	411	1.09	4.9	14.4	1.03	4.9	1.84	0.313	6.85	2.46	30.8	12.58	63.6	15.63	167.6	38.5	10510	0.884	16.58	0.566	193.3	960
727	347	1.77	2.74	383	1.31	2.99	11.8	0.86	4.1	1.44	0.34	6.61	2.225	28.2	11.81	59.4	14.26	154.4	34.92	10630	0.856	13.5	0.393	150.6	782
727	118	2.23	0.222	417	1.13	0.02	6.74	0.047	0.526	1.17	0.294	6.75	2.424	30.9	12.63	64.3	15.8	168	38.6	10170	0.901	17.84	0.65	246	1020
727	72	3.35	0.23	551	2.32	0	17	0.035	0.66	1.58	0.609	8.53	3.12	39.7	16.5	84.7	21.2	231	53.3	10040	1.16	13.8	0.677	249	751
727	4300	1.71	43	450	1.15	62	129	14	54	9.3	1.14	13.3	3.09	35.1	13.72	67.8	16.28	174.8	39.14	10180	0.933	19.32	0.91	246.6	1088
727	156	2.45	0.64	651	2.03	0.63	22.7	0.2	1.5	2.18	0.85	11.5	3.74	47.1	19.9	98.9	24.8	266	62	9800	0.901	13.33	0.81	308	758
727	133	1.92	0.63	369	1.13	0.56	7.4	0.26	1.03	1.22	0.311	5.74	2.15	26.66	11.04	56.6	14.2	155.1	36.53	10410	0.834	14.63	0.505	179.4	845
727	125	2.77	1.06	357	1.23	1.29	10.3	0.42	2.6	1.39	0.296	5.88	2.07	26.2	10.66	55.7	14.07	148.8	34.6	10330	0.807	14.5	0.719	214.4	832
727	80.2	2.87	0.298	1118	1.48	0.025	20.98	0.161	2.53	5.22	1.93	24.5	7.73	90.7	35.3	167.9	39.5	404	89.1	9670	0.777	17.45	1.33	518	1007
727	1070	1.83	6.2	437	1.14	8.4	24	2.06	8.3	2.46	0.434	8.05	2.65	33.5	13.21	67.5	16.4	174.1	39.27	10070	0.827	17.49	0.679	235.1	1007
1687	80	3.29	0.252	426	1.71	0	19.64	0.0298	0.6	1	0.443	6.86	2.36	31	13.09	67	16.27	172.1	39.3	9380	0.922	9.67	0.764	266	517
1687	88.2	3.52	0.241	475.7	1.99	0	22.11	0.0213	0.64	1.46	0.56	7.97	2.891	35.64	14.83	73.9	17.94	190.6	43.52	9710	1.047	11.99	1.04	376.4	661.4
1687	132	3.73	0.57	448	1.65	0.62	22.1	0.19	1.09	1.22	0.54	7.66	2.61	33.32	14.13	70.8	17.19	180.8	40.19	9150	0.917	10.26	0.813	309.3	555.7
1687	111	3.95	0.33	507	1.84	0.11	20.7	0.084	0.6	1.52	0.471	7.74	2.68	34.9	15.45	80.2	20.18	217.1	50.5	9490	1.041	10.23	0.787	268	550
1687	45.2	1.99	0.219	265	0.85	0	12.03	0.0158	0.169	0.417	0.217	3.12	1.137	15.78	7.51	41.9	11.47	140.9	37.53	10320	0.309	9.68	0.615	221	529
1687	810	3.58	4.4	1154	1.88	11.9	44.8	2.53	11.2	4.93	1.38	21.15	7.01	86.2	36.14	181.1	42.84	439.2	96.9	9000	0.858	11.89	1.142	403.5	649
1687	85	3.32	0.191	416.3	1.68	0	18	0.0161	0.52	1.22	0.439	6.97	2.48	31.18	12.97	66.5	16.05	171.5	39.52	9950	0.901	8.61	0.65	236.3	478
1687	120	3.5	0.364	1300	2.54	0.029	25.9	0.121	1.97	3.5	1.17	19.8	7.12	91.9	40	203.7	48.9	506	112.9	8320	0.945	15.2	1.44	527	824
1687	98	3.93	0.201	476	1.59	0	20.03	0.036	0.76	1.43	0.536	8.22	2.86	34.91	14.62	74.4	18.11	189.3	43.13	9470	0.934	10.96	0.842	327.9	601
1687	86.4	4.19	0.199	421	1.58	0.0031	20.18	0.0238	0.563	1.16	0.53	6.8	2.399	30.57	12.73	66.1	16.23	175.4	40.56	9420	0.82	9.28	0.709	254.9	508
1687	174	5.67	0.59	1540	4.96	0.39	53	0.227	3.43	5.87	1.87	30.9	10.2	121	49.3	235	54.1	546	119	8380	1.41	20.1	2.83	980	1101
1687	228	3.59	0.289	406	1.56	0.33	18.75	0.073	0.57	1.07	0.407	6.12	2.21	28.34	12.8	65.3	15.94	175.4	40.8	10040	0.865	9.52	0.828	230.9	506
1687	1920	3.39	10.2	609	2.11	36	83	7.1	28	5.8	0.92	11.5	3.55	43.2	19.13	97.6	24.1	261	58.7	9000	1.123	9.45	0.675	208.5	505
1687	282	4.1	0.97	525	1.91	1.13	26.3	0.26	2.04	1.8	0.621	8.73	3.17	38.8	15.87	80.8	19.51	208.7	47.6	9200	1.021	10.29	0.866	320	575
1687	67.9	2.69	0.191	510	1.41	0	18.01	0.0276	0.476	1.01	0.424	6.22	2.36	32.7	14.89	80.5	21.1	242	61.2	9360	0.499	9.56	0.709	257.2	518
1687	85	3.76	0.182	499	1.76	0.0036	17.79	0.042	0.507	1.24	0.462	7.08	2.63	34	15.23	80	20.16	220.3	52.6	9190	0.913	7.28	0.531	184.9	398.4
1687	1800	3.85	10.6	418	1.69	16.8	53	3.4	14.7	3.32	0.79	8.2	2.47	30.9	12.95	65.4	15.91	168.4	38.8	9550	0.926	10.83	1.56	313	560
1687	133	3.8	0.306	1204	2.51	0.017	30.16	0.128	2.03	4.07	1.246	22.8	7.49	93.7	38.7	187.9	43.8	444	96.7	9220	1.182	11.65	1.179	435	634
1687	136	3.79	0.57	426	1.51	0.55	19.62	0.142	0.95	1.38	0.504	6.47	2.32	31	12.89	66.8	16.28	173.9	40.3	9610	0.867	9.41	0.717	261.8	508
1687	221	5.36	1.32	982	2.54	0.99	30.6	0.28	2.2	3.23	1.24	16.8	6.1	74.7	30.9	150.5	35.4	369	82	9170	0.836	17.06	1.39	409	670
1687	87.9	3.81	0.236	427	1.45	0.094	20.18	0.057	0.61	1.4	0.484	6.85	2.37	30.85	12.9	65.6	16.26	175.3	39.41	9250	0.891	10.15	0.99	283.8	542
1687	179	5.93	0.78	926	2.74	0.253	28.4	0.128	1.52	2.39	0.83	14.3	5.53	68	29	145	34.9	367	83.7	9320	0.94	11.28	1.43	381	592
1687	99	3.57	0.178	531	2.03	0	26.36	0.05	0.78	1.56	0.594	9.52	3.28	40.2	16.67	81.7	19.9	211.1	47.3	9590	1.067	13.05	1.207	437	717
1687	3300	3.62	17	740	1.55	22	67	5.2	18	5.2	1.36	15.3	4.57	56	23.2	115	27.7	298	71.4	9430	0.537	11.37	1.18	335	600
1687	100.8	21	0.202	553	2.07	0.012	25.5	0.0295	0.89	1.76	0.701	9.1	3.45	41.67	17.15	85.8	20.8	218.5	49.29	9600	1.145	12.22	1.049	399.1	677.1
1687	6200	7.86	35	1170	1.01	56	140	15.6	70	19.5	4.01	38.9	9.99	107	38.9	177	39	378	82.1	7150	0.394	5.58	0.99	234	277
1687	105	3.88	0.33	468	1.71	0.13	22.9	0.064	0.75	1.46	0.539	7.66	2.76	33.9	14.47	72.2	17.61	188	42.9	9320	0.951	10.03	0.845	295.1	542
1687	63.9	2.38	0.199	335	1.58	0.003	14.91	0.0247	0.363	0.68	0.309	4.65	1.72	22.5	10.08	52.9	13.38	148.4	35.5	10430	0.824	8.89	0.561	189.9	473
1687	3000	5.83	18.1	1820	5.72	34	87	7.7	31	9.2	1.71	30.9	10.7	135	57.1	281	64.8	659	146	8860	2	60	5.8	2000	3370
1687	113	3.39	0.212	588	2.15	0.035	20.62	0.051	0.77	1.54	0.6	9.57	3.39	43.3	18.34	92.1	22.83	236.7	54.9	9700	1.053	9.93	0.771	279	539
1687	213	8.32	0.224	879	1.31	0.023	16.85	0.075	1.38	3.26	1.35	15.69	5.46	68.8	28.46	135.8	31.31	312.9	68.5	7430	0.498	5	0.418	157.3	261.6
1687	94.9	3.75	0.212	563	2.24	0.0021	23.8	0.049	0.69	1.65	0.623	9.12	3.35	42.4	17.53	87.4	20.88	221.7	50.7	9840	1.043	12.05	1.07	395	672
1687	101	2.52	0.47	445.4	1.75	0.48	18.6	0.16	0.89	1.29	0.415	6.42	2.481	31.47	13.67	69.3	17.34	188	44.18	10380	0.885	10.12	0.615	217.6	545
1687	113	3.78	0.29	447	1.58	0.27	20.39	0.084	0.75	1.5	0.463	6.85	2.571	31.71	13.46	69.3	16.84	184.1	42.35	9490	0.869	9.68	0.66	254.1	526
1687	99.1	4.15	0.47	772	2.16	0.09	24.5	0.095	1.08	2	0.91	12.8	4.34	56.6	23.9	121.4	29.6	315	73.5	9890	0.773	11.35	1.01	359	611
1687	760	4.36	5.8	471	1.74	10.8	39	2.1	8.3	2.14	0.64	8.43	2.75	35	14.48	73.4	17.92	192	43.9	8260	0.905	9.77	0.803	276.5	524.6
1687	101	2.51	0.309	577	1.16	0.037	16.74	0.07	0.75	1.53	0.594	7.85	2.89	38.7	17.6	89	23.5	265	65.4	7520	0.456	9.87	0.774	247	528
1687	90	3.81	0.215	624	2.48	0.0061	25.12	0.044	0.84	1.78	0.629	9.84	3.5	44.8	19.15	95.9	23.78	253.9	58.62	9940	1.218	12.81	1.06	393	692
1687	104	3.85	0.233	547.5	2.1	0	26.42	0.046	0.7	1.62	0.538	8.83	3.28	41.07	17.01	85.7	20.33	215.2	48.95	9660	1.12	11.88	1.017	387	661
1687	68.8	2.99	0.154	420	1.49	0	18.24	0.0239	0.48	1.14	0.479	6.64	2.388	30.28	12.82	65.2	16.11	173	40.1	10080	0.873	9.41	0.66	240.3	518
1687	154	5.31	0.4	571	2.31	0.316	11.8	0.123	1.13	1.62	0.436	10.05	3.59	44.4	17.91	87.7	21.1	222	49.8	9650	1.56	37.6	1.4	168	479
1687	77	3.71	0.215	415	1.58	0.031	17.88	0.032	0.494	1.03	0.406	6.43	2.31	29.7	12.73	64.7	16.11	171.5	40	9600	0.86	7.98	0.538	203.6	423.2
1687	180	4.14	0.77	922	2.43	0.62	27.8	0.26	1.89	2.51	0.92	13.5	4.92	65.1	28.2	144	35.1	373	87.4	9600	0.94	12.4	1.14	378	669
1687	121	3.3	0.38	535	2.04	0.2	20.2	0.105	0.65	1.42	0.48	7.94	2.9	37.7	16.35	83.6	20.9	225	51.2	9810	1.072	8.59	0.568	202.2	463.6
1687	165	6.96	0.72	667	1.97	0.85	20.37	0.32	2.09	2.08	0.82	10.6	3.6	47.4	20.5	106.8	26.3	288.1	66.6	9220	0.612	17.8	1.49	277.7	530
1687	116	21	0.35	593	2.59	0.22	29.01	0.075	1.02	2.25	0.683	10.73	3.62	45	18.55	91.1	21.82	230.6	50.9	9830	1.218	13.93	1.35	519.6	769
1687	87.1	3.68	0.149	582	2.07	0	21.14	0.0314	0.69	1.52	0.62	9.12	3.07	40.7	17.48	91.2	22.65	245	57.2	9160	1.137	9.26	0.623	245	506.2
1687	70	3.34	0.229	861	2.59	0.04	27.9	0.069	1.03	2.06	0.8	12.26	4.24	56.4	25.3	134.8	33.9	372	89.2	9750	0.793	13.74	1.131	431	760
1687	78.5	3.24	0.329	458	1.79	0	20.58	0.031	0.57	1.22	0.499	7.32	2.48	32.8	13.98	71	17.26	185.9	41.89	9840	0.932	9.41	0.686	255.4	505.4
1687	165	5.9	0.89	1038	3.1	0.208	15.9	0.15	1.98	3.59	0.808	21	6.81	80.4	31.5	153.1	35.2	356	77.1	8670	0.925	18.7	2.23	790	1050
1687	183	3.9	0.52	430	1.59	0.5	20.41	0.135	1.06	1.37	0.483	6.62	2.4	31.05	12.95	66.7	16.64	176.2	40.7	9300	0.908	9.34	0.706	255.5	505.7
1687	640	4.93	4.2	891	2.5	9.2	43.7	1.79	7.9	3.81	1.13	15.7	5.26	65.6	27.7	138.3	33	348.4	78.5	9000	0.944	11.56	1.22	402	613
1687	2630	4.96	22.2	467	1.58	39.3	88.2	7.46	29.4	5.46	1.16	10.23	3.19	35.8	14.41	71	16.98	182.8	41.62	9590	0.928	10.92	1.15	363	585
1687	131	2.88	0.269	610	1.64	0.059	18.49	0.052	0.73	1.49	0.558	8.96	3.3	43.1	18.8	97.2	24	263	62.5	9650	0.627	9.16	0.679	230	496
1687	950	4.03	7.1	527	1.96	13.7	47.3	2.8	10.6	3.04	0.805	9.42	3.17	39.1	16.45	81.4	19.7	207.9	46.7	9620	1.066	11.77	1.065	361.3	643
1687	134	3.92	0.34	952	2.18	0.023	20.08	0.069	0.93	2.24	0.75	13.3	5.18	67.5	29.5	149.6	36.4	383	84.8	8960	0.943	9	0.712	247	466
1259	78	4.35	0.36	593	2.3	0	19.25	0.036	0.548	1.53	0.566	8.56	3.12	41.2	17.41	92.3	23.63	253.9	60.3	9150	1.117	8.18	0.555	207	458
1259	71	3.17	0.262	710	1.35	0	18	0.051	1.05	2.17	0.84	12.5	4.34	54	22	110	26	270	60.9	9780	0.713	8.23	0.69	232	452
1259	82.9	3.02	0.227	624	2.25	0	20.74	0.0288	0.5	1.48	0.569	8.77	3.34	43.4	18.94	100	25.04	272.3	63.2	9590	1.232	8.79	0.512	209	486
1259	2330	4.43	18.5	396	1.49	35	85	6.9	27.8	5	0.96	8.88	2.57	29.1	12.24	61.4	14.91	161.6	36.7	9420	0.858	8.64	0.757	221.2	459
1259	92	3.16	0.242	650	2.76	0.0015	25.48	0.05	0.79	1.71	0.674	10.08	3.65	46.1	19.91	102.2	24.85	270.3	61.7	9790	1.33	14.14	1.078	403	791
1259	160	4.03	0.46	617	2.08	0.98	21.1	0.18	1.41	1.61	0.483	9.7	3.56	44.6	19.15	96.5	22.86	233	50.6	9310	1.181	9.84	0.737	256.1	542
1259	371	8.8	2.61	1027	1.85	3.33	22.2	0.71	4.34	4.15	1.13	19.1	6.42	79.2	32.3	159	37.3	386	87	8670	0.738	12.2	1.45	328	635
1259	86.9	2.76	0.208	479	1.88	0.0049	36.4	0.065	1.16	2.05	0.782	9.29	3.1	36.4	15.09	75.2	18.25	193.9	43.8	9840	0.938	2.135	0.195	403.5	691
1259	90	3.15	0.191	522	1.88	0	23.2	0.0253	0.79	1.71	0.631	8.27	3.07	38.02	15.9	79.9	19.53	204.9	46.23	9630	1.045	10.96	0.848	320	605
1259	10700	4.76	64	1440	3.88	114	256	23.9	95	18.8	3.8	32.9	9.2	108	44.7	225	53.9	553	121	9220	1.66	16	2.04	456	809
1259	206	4.2	0.41	557	2.12	0.43	20.64	0.115	0.98	1.58	0.6	8.42	3.03	39.6	16.94	87.8	21.72	235.8	54.9	9250	1.028	8.31	0.651	227.1	452.8
1259	1760	3.99	11.6	1026	2.27	17.8	61	3.7	16.5	5.87	1.68	21.1	6.59	80.3	32.5	159.2	37.5	384	84.1	9260	1.053	12.08	1.179	407	653
1259	102	3.21	0.26	563	2.21	0.37	24.23	0.082	0.98	1.71	0.545	8.73	3.21	41	17.18	88	21.36	224.2	51.8	9970	1.092	11.64	0.829	334.4	650
1259	120	5.21	0.205	913	3.19	0.0051	28.8	0.058	1	2.48	0.731	13.92	4.97	64.2	27.7	143.2	35.1	368	82	9160	1.401	12.12	1.09	387	651
1259	92	3.25	0.221	616	2.25	0.0034	26.5	0.045	0.8	1.83	0.647	10.44	3.73	46.7	19.13	95.9	22.88	238.2	52.3	9560	1.179	12.61	1.103	383	683
1259	61	2.46	0.216	430.2	1.66	0	16.24	0.032	0.3	1.03	0.339	5.69	2.08	27.8	12.76	67.7	17.49	199.8	48.8	10310	0.692	10.46	0.657	233.5	562
1259	128	4.05	0.29	963	2.26	0.21	19.91	0.132	1.58	2.62	0.866	15.18	5.44	69.1	29.3	151.6	36.23	374.8	84	8690	0.884	11.5	0.931	335	615
1259	110	3.79	0.32	796	3.31	0.12	26.8	0.07	1.05	1.8	0.681	10.88	4.03	54.6	23.71	126	32.17	345	80.6	9230	1.44	11.51	0.775	278.3	635
1259	120	3.01	0.32	497	1.75	0.037	20.36	0.047	0.564	1.28	0.457	7.43	2.723	35.45	15.03	77.9	19.18	206.3	46.3	9740	1.005	9.73	0.653	241.8	534.7
1259	110	4.53	0.3	821	1.72	0.279	27.9	0.131	1.33	2.21	0.9	12.1	4.28	56.4	24.6	128	31.9	346	82.9	8810	0.502	11.1	1.25	456	603
1259	101	3.63	0.226	556	1.86	0	24.12	0.052	0.77	1.67	0.622	9.32	3.2	41.5	17.09	87.3	20.73	219.6	48.6	9460	1.051	11.27	0.89	339	624
1259	82	36	0.198	440	1.76	0.027	18.79	0.033	0.54	1.28	0.56	7.18	2.55	32.07	13.77	68.7	16.79	176.9	39.5	9560	0.918	9.88	0.766	274.6	542.2
1259	440	3.32	3.1	538	1.99	5.1	34	1.2	3.4	2.25	0.674	8.6	3.01	38.1	16.34	83	20.66	222.2	51.3	9500	1.054	10.52	0.728	290.3	574
1259	207	3.67	0.272	1538	7.17	0	16.52	0.0327	0.92	2.89	1.06	20.9	8.54	115.9	49.2	244	56.6	563	119.4	9310	2.03	19.2	0.845	318	1069
1259	118	4.05	0.162	553	1.97	0.018	23.9	0.045	0.77	1.49	0.625	9.16	3.17	40.5	16.85	86.2	20.67	217.2	48.26	9380	1.041	12.11	1.002	368.8	658
1259	1080	3.97	8.1	465.3	1.6	14.8	47.4	2.9	11.6	2.98	0.704	8.29	2.84	34.31	14.07	71.8	17.5	187.3	42.24	9520	0.899	9.52	0.848	269.2	519
1259	630	3.51	4.4	608	2.45	7.5	38.5	1.46	6.1	2.36	0.654	9.8	3.4	44.9	18.25	94.1	23.4	248	56.5	9470	1.205	13.56	1.025	386.9	755
1259	195	3.92	0.89	597	2.21	1	29.8	0.25	1.37	1.87	0.624	9.52	3.48	42.8	18.19	93.2	22.37	235.4	52.7	9420	1.157	13.22	1.145	428	724
1259	5500	3.51	45	472	1.57	80	166	15	59	9.7	1.57	13	3.31	35.5	14.24	72.3	17.67	187.9	43.4	9530	0.946	10.01	1.05	260.9	530
1259	146	3.22	0.31	1081	1.68	0.27	23.4	0.138	2.13	3.38	1.29	19.4	6.68	84.7	34.6	169	38.2	393	86.4	9370	0.974	10.25	0.95	339	557
1259	258	4.05	0.45	409	1.43	0.55	20.35	0.165	1.01	1.33	0.535	6.56	2.4	29.7	12.38	63.7	15.78	168.9	38.7	9290	0.905	9.24	0.696	251.8	505
1259	1040	2.97	3.7	819	1.34	12.3	37	1.8	7.5	3.72	0.95	13.6	4.8	58.9	24.4	127.9	30.8	331	77.1	9460	0.655	11.15	0.98	336	602
1259	93	4.09	0.142	525.5	1.65	0	24.52	0.0255	0.71	1.54	0.618	9.01	3.008	38.8	16.22	80.6	19.56	206.9	46.74	9470	1.012	11.29	0.902	353.2	620.9
1259	157	5.27	0.247	1240	3.54	0.067	34.1	0.106	1.55	3.65	1.4	20.1	7.23	92	38.8	195	46.2	477	104.8	9240	1.359	12.17	1.11	421	657
1259	5800	4.95	42.1	533	2.21	90	183	17.3	66	10.8	1.98	14.3	3.62	40.9	16.13	82.6	19.8	214	49.3	9220	1.023	9.75	1.12	270.5	500.6
1259	80	3.96	0.199	477	1.78	0.0017	22.15	0.03	0.74	1.32	0.571	7.59	2.8	34.6	14.52	73.4	18.17	192.5	43.6	9600	0.974	10.96	0.867	322	602
1259	3960	4.36	17.5	797	0.74	69	120	10.5	37	7.3	1.57	16.7	4.81	57	24.4	122	28.7	297	64.1	7700	0.333	6.01	0.74	172	309
1259	76.1	3.55	0.142	441	1.42	0	18.02	0.028	0.59	1.36	0.509	6.78	2.32	31.7	13.47	68.8	16.77	183.7	40.7	9660	0.885	9.07	0.638	233.3	485
1259	870	3.47	6.2	887	1.81	9.2	41	2.3	10.7	4.43	1.34	17.4	5.73	69.3	27.8	137	32.3	330	73.5	9680	0.869	10.51	0.96	337	556
1259	89	3.4	0.132	511	1.82	0	20.77	0.036	0.499	1.45	0.509	7.65	2.76	35.51	15.65	80	20.26	219.6	51.2	9940	1.006	10.31	0.649	249.1	554.2
1259	89	3.19	0.158	665	1.25	0.0113	18.1	0.056	0.89	1.85	0.838	9.66	3.48	45.6	19.8	103.7	26.7	303	74.5	9080	0.378	10.03	0.89	311	528
1259	92	3.1	0.216	562	2.14	0	18.26	0.0247	0.47	1.32	0.49	8.17	2.89	39.4	17.16	90	22.44	249.8	58.3	9460	1.125	8.62	0.588	197.2	466.7
1259	155	4.24	0.61	1121	3.01	0.239	25.51	0.143	1.57	3.29	0.951	18.62	6.75	87.1	35.8	173.8	40.1	407	85.9	9210	1.377	12.8	1.09	392	688
1259	76.9	6	0.23	484	1.7	0	17.58	0.0282	0.52	1.06	0.439	6.93	2.65	34	14.56	76.9	19.28	209	48.5	9430	0.983	7.63	0.487	186.6	417.5
1259	660	3.42	4.1	480	1.53	7.3	35.9	1.37	6.1	2.07	0.656	7.97	2.79	36	14.45	74.1	18.1	192.4	42.7	9570	0.963	10.78	0.904	318	583
1259	190	2.9	1.02	440	1.33	1.4	17.5	0.33	1.43	1.11	0.417	6.03	2.14	28.9	12.8	70.3	18.41	206.3	49.9	9980	0.741	6.75	0.412	142.8	360
1259	95	3.54	0	477.4	1.73	0	19.42	0.036	0.6	1.32	0.474	7.79	2.59	33.49	14.5	74	18.13	193.8	43.57	9530	0.947	9.65	0.716	256	516
1259	106	3.59	0.257	929	2.4	0.028	25.9	0.083	1.12	2.97	1.02	16.2	5.4	69.1	28.7	143.8	34.5	363	81.3	9670	0.923	11.67	0.989	349	636
1259	90	3.71	0.216	630	2.46	0	24.97	0.051	0.66	1.45	0.614	9.24	3.5	44.3	19.44	99.9	24.36	264.2	60.44	9490	1.192	10.97	0.826	313	597
17103	1400	3.57	9	518	1.85	21.4	62.4	4.2	16.5	3.63	0.88	10.11	3.27	38.9	15.8	79.8	19.38	204.7	46.3	9550	1.025	12.07	1.117	364	654
17103	132	3.55	0.259	653	1.71	0	18.6	0.037	0.71	1.55	0.625	9.63	3.5	46.3	20.2	103.4	25.7	278	66.1	9580	0.709	9.92	0.67	242	533
17103	396	4.18	3.01	543	1.97	4.4	32.1	0.83	3.77	2.08	0.68	9.29	3.24	40.9	16.78	84	20.18	211.4	48.3	9600	1.034	13.14	1.184	442.4	719
17103	88.1	4.56	0	455	1.44	0	19.89	0.0288	0.48	1.39	0.556	7.54	2.64	33.6	13.7	71.1	17.19	186.1	42.5	9230	0.904	9.07	0.635	250.8	496
17103	1330	3.85	6.5	982	1.89	13.9	52	3	13.2	5.1	1.59	20.1	6.41	77.2	31.1	149.9	34.8	359	78.2	9470	0.89	11.26	1.18	383	597
17103	480	3.41	2.31	485	1.9	3.8	27.9	0.85	4.1	1.8	0.488	8.4	2.8	35.2	14.8	74.9	18.41	192.4	43.5	9980	0.982	10.88	0.826	281.9	581
17103	820	4.8	6.1	1109	2.95	9.9	43	1.8	7.7	4.36	1.45	19.8	6.76	85.8	34.3	170	40	407	88.3	8510	1.113	13.88	1.54	491	753
17103	78	3.46	0.152	388	1.5	0	16.36	0.034	0.42	1.05	0.407	5.95	2.05	26.6	11.57	61.9	15.66	172	41.2	9480	0.754	8.32	0.524	194	439.1
17103	45	2.8	0.172	445	1.22	0	10.11	0.0237	0.266	0.73	0.273	5.09	2.07	28.8	12.99	70.4	18.5	201.5	48.6	9300	0.649	6.94	0.378	142.6	363.1
17103	388	3.98	1.91	509	1.85	3.3	26.4	0.77	3.6	1.98	0.634	9.21	3.03	38.3	15.77	78.4	18.85	198.5	45	9740	0.963	13.65	1.35	432	678
17103	138	2.84	0.45	1141	2.22	0.66	23.1	0.19	2.19	3.91	1.13	20.7	7.12	88.4	35.6	176	40.6	415	90.3	8980	0.857	12.36	1.13	413	681
17103	74.2	3.93	0.138	484	1.8	0	16.02	0.034	0.5	1.05	0.488	7.23	2.64	33.9	14.38	76	19.37	213.7	50.5	9220	0.957	6.48	0.468	156.9	348
17103	82	10.8	2.28	2090	3.68	0.244	22.1	0.263	3.33	5.75	2.48	30.3	10.4	135	57.2	298	71.2	728	154	7520	0.681	29.4	2.75	793	1590
17103	40	2.23	0.226	291	1.03	0	10.54	0.0075	0.188	0.48	0.223	3.01	1.23	16.7	8.07	46.5	12.69	151.1	39.9	10970	0.44	9.67	0.427	163.7	514
17103	111	4.34	0.34	726	2.17	0.018	21.74	0.067	1.04	1.94	0.652	12.04	4.24	53	22.42	113.4	27.37	288.4	64.3	9260	1.063	12.11	0.968	368.5	646.7
17103	1400	84	9.6	422	1.68	15.2	49	3.5	14.3	3.6	0.78	8.4	2.5	31.7	13.14	65.5	16.01	172.1	39.1	10060	0.923	9.88	0.826	264	522
17103	216	6.1	1.72	942	1.92	0.79	25.5	0.232	1.77	2.45	1.01	14.8	5.39	68.9	29	146.7	35.6	373	83.5	9930	0.82	8.74	1.2	300	461
17103	73	3.27	0.212	393	1.52	0	18.9	0.035	0.44	1.13	0.49	6.11	2.15	29.3	11.82	60.4	14.82	162.8	38.2	10190	0.841	10.74	0.94	313	571
17103	164	5.87	0.227	1380	2.64	0.019	40.1	0.152	2.27	4.4	1.94	25.3	8.79	107	43.2	209	47.4	484	106	8930	0.829	13.45	1.58	582	720
17103	2820	3.75	17.5	470	1.5	39	87	7.7	29	5.4	0.98	9.8	2.84	33.7	14.28	74.7	18.43	203.9	48	9840	0.928	7.57	0.73	179	397
17103	335	3.56	1.45	491	2.08	1.77	22.6	0.42	1.92	1.39	0.534	7.49	2.66	34.5	14.97	76	19.2	207	47.4	9820	0.965	8.45	0.599	214	459
17103	9340	5.25	35.7	565	1.73	170	243	17	51.8	6.15	1.22	11.74	3.29	40.4	17.24	88.6	21.8	233	52.7	9760	0.891	5.94	1.08	129.9	279
17103	98	3.58	0.146	502	1.98	0.027	23.61	0.035	0.67	1.3	0.574	8.01	2.85	37.3	15.14	77.3	18.64	201.3	45.2	9970	1.066	12.25	1.032	378	662
17103	570	2.76	1.65	514	1.8	3.2	24.1	0.63	3.2	1.54	0.482	7.45	2.59	35.56	15.24	80.1	20.21	226.7	54.3	9640	1.015	8.09	0.496	185.4	439
17103	84	4.7	0.317	751	2.22	0.148	22.2	0.083	0.99	1.78	0.6	11.4	4.02	52.3	22.7	117.6	28.5	301	67.9	8750	0.943	11.2	1.15	400	595
17103	830	4.07	6	458	1.56	10	38	1.7	7.7	2.3	0.62	7.72	2.7	33.8	13.92	70.8	16.83	182.2	41.5	10100	0.913	10.43	0.85	287.4	549
17103	140	3.84	0.69	792	1.93	0.42	26.7	0.193	1.73	2.68	0.975	13	4.58	57.1	24.2	123.3	29.7	321	75.8	9560	0.625	11.89	1.17	434	638
17103	91	2.83	0.17	487	1.83	0	18.64	0.035	0.59	1.36	0.517	7.45	2.62	35.9	14.89	75.5	18.33	197	44.9	10150	1.02	10.92	0.766	289.5	593
17103	253	6.3	0.65	2180	3.71	0.59	47.1	0.401	5.26	9.6	3.5	48.4	15.8	184	69.9	314	67.2	652	133	8870	1.159	17.1	2.18	808	938
17103	81	3.35	0.204	408	1.54	0	17.03	0.023	0.515	1.07	0.364	5.86	2.19	28.4	12.11	62.7	15.75	171.2	40.6	10160	0.772	10.44	0.672	258.4	567
17103	108	3.55	0.215	576	1.98	0.018	23.95	0.052	0.85	1.65	0.684	9.67	3.57	43	17.39	86.6	21.02	223.9	49	9790	1.11	13.31	1.218	445.4	729
17103	132	3.46	0.3	981	2.37	0.038	23.8	0.079	1.51	3.24	1.15	17.5	6.06	75.5	31.1	150.1	36	376	85.8	9470	0.847	12.96	1.14	394	683
17103	103	3.83	0.232	674	2.51	0.0089	23.52	0.05	0.87	1.58	0.694	9.4	3.57	47.6	20.18	106.7	26.12	288.2	67.6	9580	1.295	10.52	0.794	289	579.1
17103	124	3.42	0.235	708	1.86	0.017	19	0.06	1.21	1.94	0.81	11.2	4.08	51.7	21.7	109.7	26.9	287	66.7	9710	0.733	9.38	0.691	259	509
17103	107	3.56	0.356	440.7	1.88	0.073	18.97	0.066	0.61	1.32	0.572	7.26	2.55	32.45	13.46	68	16.44	175.8	39.84	10340	1.03	9.43	0.691	266.6	517.5
17103	1820	4.64	11	738	2.72	23.4	70	4.9	18.7	4.4	1.11	13.75	4.39	54	22.28	114	27.49	289.6	64	9540	1.237	12.76	1.18	383	686
17103	709	3.88	2.79	477	1.71	3.91	28.8	0.85	3.56	1.61	0.575	7.82	2.76	34.68	14.67	73.1	17.9	191	42.9	9710	0.93	9.3	0.727	257.4	507
17103	350	4.7	1.6	463	1.92	2.6	28.4	0.55	3.4	1.71	0.607	8.07	2.68	33.4	13.88	71.2	17.41	184.8	41.7	9410	0.955	10.92	0.899	307.5	572
17103	94.4	2.88	0.228	515	2	0	23.62	0.0322	0.57	1.5	0.522	8.17	2.91	36.9	15.6	78.5	19.16	205.4	45.8	10030	1.081	11.98	0.885	350.8	660
17103	270	3.2	0.95	401	1.34	3.9	18.8	0.88	3.8	1.33	0.321	4.97	2.01	26.4	11.72	63.2	16.46	189	46	9610	0.657	8.27	0.466	164.3	448
17103	89	81	0.5	403	1.42	0.11	17.7	0.038	0.492	1.11	0.449	6.41	2.24	28.5	12.26	61.7	15.07	161.7	37	9750	0.855	8.31	0.763	215.4	437
17103	152	4.2	0.51	632	2.05	0.232	23.3	0.098	1.02	1.71	0.73	9.7	3.56	45.4	19	96.6	23.1	246	56.5	9350	0.992	8.44	0.715	244	454
17103	560	4.58	2.2	740	3.67	5.9	32.5	0.97	5	2.32	0.717	10.5	3.87	50.3	22.1	115	28.7	308	69	9640	1.42	15.3	1.04	359	810
17103	71	2.51	0.267	685	1.91	0.014	20.3	0.033	0.84	1.78	0.66	9.9	3.78	47.1	20.8	106.1	27.1	296	69.5	9990	0.882	9.62	0.696	240	521
17103	96	3.95	0.256	526	1.82	0.0076	21.93	0.042	0.68	1.61	0.589	8.71	2.93	37.52	15.94	80.5	19.94	210.7	48.7	9520	0.968	10.21	0.781	293	560
17103	300	3.46	0.81	522	1.92	1.8	25.1	0.37	1.79	1.58	0.532	7.96	2.98	37.6	15.84	81.1	19.91	207	47.4	10170	0.979	10.13	0.653	254.8	556
17103	1740	3.49	11.6	437	1.71	19.3	54.6	3.62	14.3	3	0.733	8.59	2.61	31.8	13.08	68.2	16.84	177.8	41.1	9880	0.895	10.1	0.947	271.5	537
17103	126	3.77	0.36	1284	2.29	0.034	23.2	0.116	2.22	4.26	1.17	23.6	8	100	40.9	201.1	46.2	463	99.3	9110	1.073	12.1	1.026	384	664
17103	1400	3.96	5.5	483	1.72	7.1	35.8	1.73	7.8	2.7	0.723	8.47	2.9	36.1	15.03	74.8	17.92	189.8	42.8	9770	0.954	10.83	0.943	333.3	590
17103	101	3.62	0.306	793	1.87	0.026	15.72	0.055	0.85	1.86	0.585	11.8	4.32	57.5	24.1	124.6	30.1	314	70.4	9330	1.049	9.09	0.572	227	495
17103	212	4.06	0.82	459	1.71	1.39	21.5	0.3	2.09	1.22	0.506	6.84	2.43	32.8	13.51	70.9	17.8	193	44.4	9640	0.868	8.23	0.629	226.5	442
17103	119	3.03	0.41	955	2.11	0.33	20.5	0.133	1.67	2.91	0.99	15.6	5.4	68.5	28.6	148.6	36.3	385	87.7	9370	0.85	11.32	0.915	336	605
17103	4700	3.74	30	506	1.78	48	123	11.6	48	8.1	1.77	13.3	3.41	39	15.64	77.6	18.77	201.6	46.1	10100	1.007	10.74	0.96	289.8	571
17103	104	4	0.31	1155	2.18	0	29.1	0.105	2.15	3.72	1.39	21.29	7.34	87	35.6	175	41.2	431	97.2	9720	0.836	13.31	1.378	503	722
1677	65.7	2.85	0.236	455	1.91	0	17.6	0.031	0.532	1.18	0.504	7.29	2.51	33.26	13.78	70	17.22	185.6	42.93	10110	0.955	13.35	0.8	298.3	741
1677	336	2.69	0.322	2150	3.5	0.051	6.8	0.136	2.99	7.15	0.364	46.5	16.6	201	77.8	342	67.6	595	116.1	9050	1.2	81	8.9	355	520
1677	88	2.6	0.23	559	2.24	0.057	22.61	0.031	0.55	1.37	0.621	8.7	3.17	40.8	17.33	87.8	21.46	229.9	52.7	10210	1.134	15.43	1.69	339.5	801
1677	281	3.09	1.7	619	2.69	1.45	27.8	0.45	2.26	2.08	0.815	10.94	3.89	47.1	19.15	95.6	23.05	241.1	54.4	10040	1.363	19.7	1.41	529.2	1098
1677	76.6	3.08	0.27	577	2.35	0	24.55	0.0325	0.575	1.43	0.688	9.54	3.48	42.7	17.77	89.2	21.46	228.2	51.9	10110	1.162	16.5	1.231	448	891
1677	215	2.53	1.06	548	2.13	1.33	24.4	0.35	1.65	1.72	0.663	9.2	3.19	40.8	16.68	83.9	20.26	213.7	48.3	10340	1.21	15.15	1.099	405	830
1677	87	1210	0.31	562	2.37	0.2	24.07	0.078	0.83	1.5	0.596	9.45	3.26	42.1	17.54	86.7	20.88	219.6	50.39	10100	1.192	14.97	0.983	391.6	813
1677	81.2	2.51	0.35	525	1.96	0	19.59	0.031	0.51	1.33	0.594	8.75	3.06	38.5	16.07	80.2	19.79	208.8	47.7	10360	1.135	14.72	0.86	314.6	814
1677	285	4.8	0.81	788	1.53	0.82	18	0.27	2.46	3.25	1.29	17.4	5.38	63.8	24.9	117.7	27.4	282	63.9	9420	0.528	9.9	0.829	285	526
1677	30	1.42	0.241	431	1.43	0.0015	7.11	0.0064	0.169	0.36	0.22	3.08	1.446	22.7	11.83	70.7	20.2	252	70.7	12290	0.358	21.2	0.577	197.3	1158
1677	560	3.54	3.4	608	2.51	4.4	31.6	1.05	5.2	2.35	0.815	10.85	3.58	44.5	18.61	94.1	22.5	238.1	53.9	10130	1.262	19.09	1.32	463	1051
1677	144	2.83	0.264	598	1.99	0.024	18.41	0.035	0.54	1.55	0.658	8.89	3.34	41.9	18.18	93.6	22.78	245.9	57.8	9740	0.877	9.92	0.679	240.3	551
1677	75	3.3	0.193	606	2.28	0.0018	20.74	0.0296	0.58	1.59	0.635	9.14	3.39	42.9	18.42	94.6	23.41	246.9	58.3	10260	1.173	13.39	0.772	311.2	735
1677	470	5.02	2.2	1016	1.67	3.5	25.7	1.3	5.6	4.58	1.39	19.3	6.41	76.8	31.9	154.8	36.5	376	82.5	8450	0.823	8.18	0.861	275	436
1677	71.3	2.68	0.234	584	2.23	0	23.43	0.037	0.61	1.47	0.65	8.89	3.38	41.9	18.05	90.2	21.83	232.5	53.1	10310	1.154	17.03	1.072	417.7	951
1677	61.2	2.27	0.194	462	1.88	0	14.38	0.0295	0.388	1.11	0.467	6.13	2.521	32.19	14.15	73.7	18.34	198.7	46	10530	0.904	11.56	0.531	208.2	641
1677	125	3.18	0.42	716	2.77	0.92	25.8	0.186	1.37	1.93	0.681	10.21	3.85	49.8	21.69	113.1	28.16	303.7	69.3	9770	1.239	9.56	0.636	244.9	530
1677	135	3.58	0.64	427	1.58	0.73	20.6	0.219	1.19	1.27	0.52	7.18	2.45	30.73	12.97	66.5	16.31	171.9	39.57	10330	0.991	9.96	0.737	260.9	546
1677	4900	7.3	31	1512	3.75	74	184	14.9	58	12.4	2.59	34.2	10.24	121.3	49.3	235	53.2	521	110	8940	1.389	12.72	2.15	470	636
1677	960	2.98	8.1	584	2.32	10.4	44	2.54	11	3.11	0.916	11.07	3.62	43.6	18.18	90.8	22.19	230.8	52.59	8800	1.214	16.76	1.17	402	915
1677	4000	2.82	34	526	2.01	37	98	9.4	40	6.9	1.52	12.5	3.37	39.8	16.08	80	19.46	207.8	47.3	7870	1.049	15.06	1.08	300.2	808
1677	970	2.65	5.7	559	2.34	6.6	35.8	1.87	7.5	2.39	0.822	9.27	3.17	39.73	17.33	87.2	21.54	233.3	54.28	10620	1.166	16.5	0.969	325.2	908
1677	79	3.1	0.301	1202	1.53	0.013	24	0.144	2.72	4.41	1.48	22.05	7.57	91.5	37.1	183.1	43.4	437	95.9	9010	0.785	12.52	1.15	443	686
1677	3000	3.32	21.8	636	2.58	22.3	72	6.6	29.5	6.8	1.53	14.1	3.99	47	19.55	99.3	24.3	260	60.2	10200	1.241	15.31	1.063	351.6	833
1677	86	3.08	0.265	510	1.86	0.035	22.24	0.051	0.69	1.42	0.558	8.69	2.97	37.8	15.52	78.8	19.16	201.7	46.2	10230	1.071	14.26	1.061	404.3	782
1677	81	2.68	0.199	628	2.72	0.03	22.55	0.035	0.67	1.72	0.798	10.31	3.63	45.4	19.26	97.2	23.8	250	56.9	10200	1.394	17.25	1.13	410.5	969
1677	85.7	3.07	0.245	578	2.09	0	21.2	0.039	0.63	1.21	0.68	8.67	3.19	41.5	17.52	90.4	21.9	237	54.5	10100	1.139	15.03	0.949	361.8	821
1677	148	3.32	0.63	1000	1.98	0.93	23.2	0.29	2.7	4.7	1.39	21	6.9	80	31.9	153	35.2	359	79	9840	0.98	13	1.08	418	720
1677	85	2.56	0.278	573	2.05	0	20.46	0.035	0.491	1.37	0.626	8.81	3.03	39.02	16.88	88.9	22.19	243.8	58.3	10780	1.106	19.58	1.036	382.4	1091
1677	141	3.49	0.31	1076	1.83	0	19.7	0.091	1.87	2.83	1.16	17.7	6.28	80.9	34	168	40.4	414	93.1	8800	0.676	9.27	0.926	299	493
1677	78.1	2.31	0.171	513	2.02	0	16.51	0.0216	0.456	1.13	0.558	7.61	2.82	36.9	15.41	80.1	19.87	214.2	49.4	10380	1.076	13.26	0.66	245.7	733
1677	79	2.19	0.187	605	2.11	0	16.17	0.0182	0.348	1.2	0.549	7.44	2.91	40.2	17.77	99.1	25.72	286	69.4	10170	1.282	12.47	0.567	213.1	691
1677	2210	3.66	12.7	720	1.55	27.1	69	4.8	18.4	5.1	1.4	15.7	4.83	55.4	22.6	110	26.8	284	64.6	10090	0.754	10.17	1.16	326	544
1677	91	2.96	0.121	613	2.28	0	20.28	0.0213	0.474	1.37	0.682	9.69	3.34	44	18.6	94.6	23	245	56.6	10130	1.205	13.34	0.764	287.9	744
1677	111	3.14	0.35	999	1.92	0	28	0.13	2.4	4.51	1.62	21.1	6.86	81.4	31.4	151.1	35.6	355	79.8	9700	0.968	13	1.36	502	723
1677	85	2.68	0.266	517	1.74	0	18.5	0.032	0.5	1.4	0.54	7.32	2.82	35.7	15.7	81.2	20.05	214.6	50.7	10490	0.968	16.04	0.996	357.8	901
1677	3770	5.91	22.5	1800	3.71	36	122	8.3	35.9	12.1	3.68	40.2	12.4	151	58.2	268	59.9	596	132	9030	0.94	16.7	3.18	800	873
1677	130	1.84	0.195	545	1.93	0	14.3	0.0141	0.387	0.93	0.468	7.26	2.67	36.2	16.45	87.7	22.07	243.1	58.1	10140	0.87	12.53	0.632	198.1	672
1677	112	2.79	0.22	526	2.29	0.05	19.9	0.043	0.67	1.39	0.572	8.7	3.01	38.7	16.08	82.1	20	209	47.5	10320	1.235	16.48	1.027	380	884
1677	93	2.99	0.138	495	1.76	0	21.46	0.0276	0.76	1.66	0.616	8.26	2.88	37.5	15.43	77.6	18.82	196.8	45	9860	0.988	12.34	0.927	341.8	680
1677	78.6	2.9	0.256	551	2.15	0	19.94	0.033	0.54	1.49	0.634	8.78	3.1	40.1	16.9	84.7	20.8	216	49.7	10100	1.099	13.4	0.827	309.6	748
1677	302	4.41	1.17	979	2.53	0.93	31.7	0.37	2.86	3.66	1.31	19	6.22	75.7	30.6	151.5	35	361	80.8	9510	1.131	12.92	1.2	453	704
1677	77	2.3	0.286	559	2.22	0.0137	20.51	0.0271	0.6	1.4	0.665	8.5	3.17	40.1	17.02	87.5	20.92	221.8	51	10400	1.108	15.96	0.976	383.9	904
1677	119	3.12	0.306	870	1.78	0.074	25.1	0.152	2.17	3.32	1.38	18.3	5.75	70	28.4	140	33.1	342	77.2	10170	0.97	12.3	1.17	430	649
1677	66	2.18	0.197	512	2.21	0	16.57	0.027	0.48	1.29	0.471	7.86	2.83	37.4	15.58	81.1	20.07	217.9	50.5	10380	1.129	13.19	0.789	267	733
1677	95	3.15	0.253	866	1.47	0.045	22.8	0.093	1.67	3.25	1.12	17.1	5.6	67.6	27.5	133.5	31.5	320	71.9	9770	0.812	9.98	0.864	328	557
1677	76	2.96	0.207	560	1.99	0	17.1	0.029	0.384	1.31	0.524	7.45	2.82	37.7	16.6	88.6	22.3	250	62.1	10570	1.05	11.27	0.619	234	617
1677	206	4.78	0.82	956	3.82	1.25	41.1	0.32	2.57	2.86	0.98	16	5.79	71.8	29.7	148	35.2	367	81.2	9510	1.47	15.52	1.493	540	848
1677	97	3.1	0.21	805	2.99	0	21.01	0.0311	0.8	1.99	0.775	12.29	4.48	58.8	24.43	126.4	31.6	330	76.9	10090	1.481	14.07	0.832	311.7	787
1677	420	2.15	1.29	474	1.93	1.25	16.6	0.43	1.82	1.37	0.488	6.81	2.47	31.6	13.82	75.3	18.9	210	49.9	10970	0.984	14.74	0.749	263.4	821
1677	340	2.11	2.2	515	1.6	1.8	11.9	0.66	3.6	1.96	0.459	8.91	3.07	38	15.93	79.9	19.4	203	46.7	10110	1.116	16.62	0.596	219.6	956
1677	71	2.39	0.34	405	1.89	0.065	16.3	0.037	0.48	1.26	0.397	6.67	2.36	29.66	12.45	63.7	15.74	165.1	38.34	10610	0.987	11.01	0.564	242	614
1677	102	3.16	0.48	712	1.65	0.14	17.1	0.091	1.45	2.26	0.734	12.4	4.16	52.8	22.1	110.8	26.9	287	67.6	9480	0.717	11.48	0.914	312	623
1677	1700	2.96	11.6	570	2.29	9.7	43.9	3.06	14.7	4.9	1.08	11.6	3.62	43.3	17.57	86.7	21.24	221.9	50.4	10210	1.166	15.27	1.022	359	824
1677	70.7	2.58	0.359	421	1.72	0.016	13.18	0.0214	0.397	0.86	0.404	6	2.24	29.5	12.95	66.6	16.82	181.7	42.6	10470	1.005	9.2	0.465	163	500

## Sheet: Table 8_Hf-Data
sample	176Hf/177Hf	error	Lu/Hf	epsilon today	epsilon T=27 Ma	average	1stdev
723-37	0.282753	1.2e-05	0.0004	-0.636557	0.854526
723-43	0.282772	1.4e-05	0.0004	0.0353643	1.52657
723-49	0.282757	1.4e-05	0.0004	-0.4951	0.996008
723-51	0.282763	1.6e-05	0.0004	-0.282914	1.20823
723-50	0.282746	1.5e-05	0.0004	-0.884108	0.606932
723-44	0.282667	1.4e-05	0.0004	-3.67789	-2.18734
723-29	0.282683	1.2e-05	0.0004	-3.11206	-1.62141
0723						-1.29332	1.47288
831-35	0.282651	1.6e-05	0.0004	-4.24372	-2.75327
831-45	0.282695	1.5e-05	0.0004	-2.68769	-1.19697
831-44	0.282687	1.2e-05	0.0004	-2.9706	-1.47993
831-36	0.282735	1.5e-05	0.0004	-1.27311	0.217856
831-39	0.282681	1.4e-05	0.0004	-3.18279	-1.69215
831-31	0.282717	1.3e-05	0.0004	-1.90967	-0.418814
831-26	0.282687	1.4e-05	0.0004	-2.9706	-1.47993
831-12	0.282696	1.3e-05	0.0004	-2.65232	-1.16159
0831						-2.73631	0.879536
1361B-19	0.282729	1.6e-05	0.0004	-1.4853	0.00563287
1361B-27R	0.282691	1.8e-05	0.0004	-2.82914	-1.33845
1361B-27C	0.282651	2.2e-05	0.0004	-4.24372	-2.75327
1361B-28	0.282698	1.5e-05	0.0004	-2.58159	-1.09085
1361B-29	0.282765	1.4e-05	0.0004	-0.212186	1.27897
1361B-29-II	0.282694	0.00014	0.0004	-2.72305	-1.23234
1361B-30C	0.282723	1.6e-05	0.0004	-1.69749	-0.20659
1361B-30R	0.282713	1.4e-05	0.0004	-2.05113	-0.560296
1361B-24R	0.282678	1.3e-05	0.0004	-3.28888	-1.79826
1361B-24C	0.282703	1.5e-05	0.0004	-2.40477	-0.914001
1361B						-2.35173	1.09169
1361A-39	0.282705	1.6e-05	0.0004	-2.33404	-0.84326
1361A-26	0.282724	1.7e-05	0.0004	-1.66212	-0.17122
1361A-16	0.282711	1.5e-05	0.0004	-2.12186	-0.631037
1361A-16B	0.282714	1.3e-05	0.0004	-2.01577	-0.524925
1361A-10	0.282686	1.4e-05	0.0004	-3.00597	-1.5153
1361A-6	0.282713	1.7e-05	0.0004	-2.05113	-0.560296
1361A-7	0.282709	1.4e-05	0.0004	-2.19259	-0.701778
1361A-13	0.282705	1.4e-05	0.0004	-2.33404	-0.84326
1361A						-2.21469	0.38459
1681-12	0.282647	1.3e-05	0.0004	-4.38517	-2.89475
1681-12C	0.282704	1.3e-05	0.0004	-2.36941	-0.878631
1681-7	0.282676	1.6e-05	0.0004	-3.35961	-1.86901
1681-1	0.282684	1.5e-05	0.0004	-3.07669	-1.58604
1681-2R	0.282675	1.4e-05	0.0004	-3.39497	-1.90438
1681-2C	0.282669	1.4e-05	0.0004	-3.60716	-2.1166
1681-3	0.282644	1.5e-05	0.0004	-4.49127	-3.00086
1681-9	0.282726	1.4e-05	0.0004	-1.59139	-0.100479
1681-14	0.282621	1.4e-05	0.0004	-5.30465	-3.81439
1681-21	0.282669	2e-05	0.0004	-3.60716	-2.1166
1681						-3.51875	1.06319
727-37	0.282749	1.1e-05	0.0004	-0.778015	0.713044
727-38R	0.282697	9e-06	0.0004	-2.61696	-1.12622
727-38C	0.282737	1.2e-05	0.0004	-1.20239	0.288597
727-39	0.282769	1.1e-05	0.0004	-0.0707286	1.42045
727-40	0.282708	1.1e-05	0.0004	-2.22795	-0.737148
727-35	0.282741	1.2e-05	0.0004	-1.06093	0.430079
727-36	0.282726	1.6e-05	0.0004	-1.59139	-0.100479
727-27	0.282712	1.1e-05	0.0004	-2.08649	-0.595666
727-26	0.282729	1.1e-05	0.0004	-1.4853	0.00563287
727-25	0.282725	1.2e-05	0.0004	-1.62676	-0.135849
0727						-1.47469	0.744249
1259-27	0.282865	1.6e-05	0.0004	3.32424	4.81603
1259-31	0.282796	1.3e-05	0.0004	0.884108	2.37546
1259-32	0.282825	1.2e-05	0.0004	1.90967	3.4012
1259-32C	0.282871	1.6e-05	0.0004	3.53643	5.02825
1259-24	0.282801	1.6e-05	0.0004	1.06093	2.55231
1259-11	0.282875	1.2e-05	0.0004	3.67789	5.16973
1259-9	0.282802	1.4e-05	0.0004	1.09629	2.58768
1259-5	0.282881	1.6e-05	0.0004	3.89007	5.38195
1259-10	0.282838	1.1e-05	0.0004	2.36941	3.86102
1259-15	0.282842	1.7e-05	0.0004	2.51087	4.0025
1259						2.42599	1.15646
1677-33	0.282681	1.2e-05	0.0004	-3.18279	-1.69215
1677-38	0.282725	1.4e-05	0.0004	-1.62676	-0.135849
1677-37	0.282705	1.2e-05	0.0004	-2.33404	-0.84326
1677-36	0.282691	9e-06	0.0004	-2.82914	-1.33845
1677-31	0.282699	1.1e-05	0.0004	-2.54623	-1.05548
1677-30	0.282711	1.1e-05	0.0004	-2.12186	-0.631037
1677-22	0.282707	1.4e-05	0.0004	-2.26332	-0.772519
1677-21	0.282701	1.1e-05	0.0004	-2.4755	-0.984742
1677						-2.42245	0.465721
1687-34	0.282719	1.1e-05	0.0004	-1.83894	-0.348072
1687-33	0.282732	9e-06	0.0004	-1.37921	0.111744
1687-32	0.282743	9e-06	0.0004	-0.990201	0.50082
1687-30	0.282733	9e-06	0.0004	-1.34384	0.147115
1687-28	0.282741	1.1e-05	0.0004	-1.06093	0.430079
1687-29	0.282712	1.5e-05	0.0004	-2.08649	-0.595666
1687-26	0.282724	1.1e-05	0.0004	-1.66212	-0.17122
1687-23	0.282691	1.3e-05	0.0004	-2.82914	-1.33845
1687						-1.64886	0.605469
17103-33	0.282789	1.6e-05	0.0004	0.636557	2.12787
17103-29	0.282839	1.2e-05	0.0004	2.40477	3.89639
17103-28R	0.282835	1.3e-05	0.0004	2.26332	3.75491
17103-27	0.282784	1.5e-05	0.0004	0.459736	1.95101
17103-30	0.282866	1.8e-05	0.0004	3.35961	4.8514
17103-26	0.282783	1.9e-05	0.0004	0.424372	1.91564
17103-19	0.282787	1.7e-05	0.0004	0.565829	2.05712	**
17103						1.44488	1.20385
